# Supplementary material for: Serotonin signaling by maternal neurons upon stress ensures progeny survival
Source: bioRxiv preprint, doi:10.1101/2020.01.20.913038, version 1 (2020-01-21)
Supplement: Supplemental File 2 [file 913038_file03.xlsx]

## Sheet: Changes in Gene_expression on s
Wormbase Gene	baseMean	log2FoldChange	lfcSE	stat	pvalue	padj	external_gene_name	chromosome_name	start_position	end_position	strand
WBGene00000001	9615.73	0.00773095	0.0816083	0.0947324	0.924527	0.999992	aap-1	I	5107833	5110183	1
WBGene00000002	811.333	0.0308123	0.171742	0.17941	0.857616	0.999992	aat-1	IV	9598986	9601695	-1
WBGene00000003	1201.64	0.0295538	0.0929315	0.318017	0.750472	0.999992	aat-2	V	9244402	9246360	-1
WBGene00000004	2090.79	0.0448742	0.0787739	0.569659	0.568909	0.999992	aat-3	X	2552436	2557726	1
WBGene00000005	1279.89	0.0654165	0.105441	0.62041	0.534988	0.999992	aat-4	IV	6272529	6275713	-1
WBGene00000006	665.948	0.0429653	0.236053	0.182015	0.855571	0.999992	aat-5	I	2571782	2576020	-1
WBGene00000007	1250.36	0.037508	0.13726	0.273262	0.784652	0.999992	aat-6	V	11466844	11470663	-1
WBGene00000008	297.814	-0.146935	0.191952	-0.765476	0.443988	0.999992	aat-7	II	1386888	1391567	1
WBGene00000009	117.775	0.129121	0.343641	0.375742	0.707108	0.999992	aat-8	IV	3862129	3865042	-1
WBGene00000010	6009.99	0.0533286	0.0715912	0.744905	0.456329	0.999992	aat-9	I	11388689	11396660	-1
WBGene00000012	46.9312	-0.433725	0.517436	-0.838221	0.401907	0.999992	abf-1	I	3886111	3887080	-1
WBGene00000013	61.6736	0.341971	0.769451	0.444435	0.656728	0.999992	abf-2	I	3885548	3885905	-1
WBGene00000015	6.38923	-0.00157019	1.97769	-0.000793951	0.999367	0.999992	abf-4	V	20557945	20558379	-1
WBGene00000016	282.706	0.203776	0.248064	0.821464	0.411382	0.999992	abf-5	X	12792727	12793386	1
WBGene00000017	344.332	0.190045	0.234746	0.809578	0.418183	0.999992	abf-6	X	12794118	12794870	1
WBGene00000018	3381.7	0.0147394	0.0708708	0.207976	0.835247	0.999992	abl-1	X	10605832	10624185	-1
WBGene00000019	224.175	0.193622	0.244249	0.792726	0.427938	0.999992	abt-1	IV	10206189	10214911	-1
WBGene00000020	2532.13	-0.0300846	0.140544	-0.214058	0.830501	0.999992	abt-2	I	2255923	2272866	-1
WBGene00000021	17.2422	-0.160157	0.861224	-0.185964	0.852473	0.999992	abt-3	IV	12950315	12957128	-1
WBGene00000022	5840.99	-0.0465224	0.138787	-0.335207	0.737469	0.999992	abt-4	V	323774	330725	-1
WBGene00000023	592.272	0.0781339	0.379549	0.20586	0.8369	0.999992	abt-5	I	12011195	12018668	1
WBGene00000024	50.3724	0.0399093	2.64466	0.0150905	0.98796	0.999992	abu-1	V	10380340	10381826	-1
WBGene00000025	10.1205	0.206736	1.17167	0.176446	0.859944	0.999992	abu-2	X	1408836	1410652	-1
WBGene00000027	11.9533	-0.738447	1.33671	-0.552437	0.580649	0.999992	abu-4	V	2274842	2275977	1
WBGene00000029	108.84	0.000181978	1.00224	0.00018157	0.999855	0.999992	abu-6	V	5160671	5161892	-1
WBGene00000030	116.041	-0.11453	0.711953	-0.160868	0.872198	0.999992	abu-7	V	5163396	5164759	-1
WBGene00000031	212.32	-0.0871532	0.576288	-0.151232	0.879793	0.999992	abu-8	V	5163269	5194608	-1
WBGene00000032	31.0354	-0.0122207	0.795923	-0.0153541	0.98775	0.999992	abu-9	X	8322111	8323418	1
WBGene00000033	128.819	-0.0482489	0.635417	-0.0759328	0.939473	0.999992	abu-10	X	3798179	3799741	1
WBGene00000034	172.269	0.0222481	0.586878	0.0379093	0.96976	0.999992	abu-11	II	192531	194558	-1
WBGene00000035	567.81	-0.0848834	0.147618	-0.575021	0.565277	0.999992	ace-1	X	16367229	16373789	1
WBGene00000036	1458.6	-0.0128288	0.108639	-0.118087	0.905999	0.999992	ace-2	I	3302001	3307587	-1
WBGene00000037	275.5	-0.0763865	0.304756	-0.250648	0.802086	0.999992	ace-3	II	14205633	14210214	1
WBGene00000038	64.1124	0.115216	0.323228	0.356454	0.721501	0.999992	ace-4	II	14198046	14205325	1
WBGene00000039	837.942	-0.0422652	0.136378	-0.309912	0.756628	0.999992	acn-1	X	5092458	5097067	-1
WBGene00000040	25473.9	0.00886988	0.113118	0.0784128	0.9375	0.999992	aco-1	X	11339874	11343568	1
WBGene00000041	119994	-0.0351088	0.0522737	-0.671635	0.501816	0.999992	aco-2	III	7973717	7977355	1
WBGene00000042	45.6109	-0.249021	0.634555	-0.392434	0.694737	0.999992	acr-2	X	6702463	6709142	1
WBGene00000043	21.088	0.220988	0.6384	0.346159	0.729223	0.999992	acr-3	X	6709538	6712925	1
WBGene00000044	41.7691	0.314463	0.587404	0.535343	0.592413	0.999992	acr-5	III	6509699	6514768	-1
WBGene00000045	1.58115	1.19313	3.05707	0.390286	0.696325	0.999992	acr-6	I	4359207	4362548	1
WBGene00000046	26.9665	0.0831176	0.618639	0.134356	0.893121	0.999992	acr-7	II	7845662	7849797	-1
WBGene00000047	154.436	0.102438	0.307776	0.332832	0.739261	0.999992	acr-8	X	10412725	10416630	1
WBGene00000048	77.289	-0.00447729	0.284767	-0.0157227	0.987456	0.999992	acr-9	X	13642348	13646898	-1
WBGene00000049	17.6178	-0.124167	0.779878	-0.159213	0.873501	0.999992	acr-10	X	4022273	4025584	1
WBGene00000050	148.615	0.0078912	0.258723	0.0305005	0.975668	0.999992	acr-11	I	6621687	6624894	-1
WBGene00000051	260.421	0.11655	0.218072	0.534458	0.593025	0.999992	acr-12	X	13532871	13536433	1
WBGene00000053	9.46518	-0.647735	1.11897	-0.578868	0.562678	0.999992	acr-14	II	8174845	8177195	-1
WBGene00000054	272.627	0.0302238	0.292048	0.103489	0.917575	0.999992	acr-15	V	8552695	8555388	1
WBGene00000055	304.327	0.095071	0.17977	0.528849	0.59691	0.999992	acr-16	V	8561216	8564345	1
WBGene00000056	94.5847	-0.110307	0.397993	-0.277158	0.781659	0.999992	acr-17	V	2608656	2615247	1
WBGene00000057	214.979	0.0907267	0.233157	0.389123	0.697186	0.999992	acr-18	V	15551155	15559147	-1
WBGene00000058	50.3603	0.126906	0.523687	0.242332	0.808523	0.999992	acr-19	I	9031274	9036695	-1
WBGene00000059	55.9613	-0.179792	0.520422	-0.345473	0.729739	0.999992	acr-20	II	14373831	14377890	-1
WBGene00000060	28.9096	0.0417377	0.555086	0.0751914	0.940062	0.999992	acr-21	III	6581927	6586549	1
WBGene00000061	24.2467	0.12311	0.918534	0.134029	0.89338	0.999992	lgc-11	X	7503823	7506633	-1
WBGene00000062	35.0774	-0.405299	0.487993	-0.830544	0.406231	0.999992	acr-23	V	3651686	3659499	-1
WBGene00000063	188536	0.0109806	0.146175	0.0751197	0.940119	0.999992	act-1	V	11079167	11082497	1
WBGene00000064	212068	-0.023591	0.0983093	-0.239967	0.810356	0.999992	act-2	V	11076723	11078168	-1
WBGene00000065	214855	-0.0714636	0.145021	-0.49278	0.622168	0.999992	act-3	V	11071690	11074498	-1
WBGene00000066	175071	0.0266488	0.158754	0.167862	0.866692	0.999992	act-4	X	4960553	4964416	1
WBGene00000067	57093.2	-0.0408466	0.213706	-0.191134	0.84842	0.999992	act-5	III	13604339	13606067	-1
WBGene00000068	1040.07	-0.0205804	0.12262	-0.167838	0.866711	0.999992	acy-1	III	4722126	4730919	1
WBGene00000069	108.776	-0.0617901	0.266957	-0.231461	0.816957	0.999992	acy-2	V	5976029	5981513	1
WBGene00000070	1521.24	0.0257352	0.137098	0.187714	0.851101	0.999992	acy-3	III	3774896	3786640	-1
WBGene00000071	1019.4	0.0949604	0.129994	0.730499	0.465085	0.999992	acy-4	V	5624727	5630892	-1
WBGene00000072	966.865	0.013157	0.179034	0.0734886	0.941417	0.999992	add-1	X	4854069	4860036	-1
WBGene00000073	2633.04	0.0510685	0.129534	0.394249	0.693397	0.999992	add-2	V	12009537	12013605	-1
WBGene00000074	2931.25	0.018517	0.0707017	0.261903	0.793396	0.999992	adm-2	X	13687973	13695800	1
WBGene00000075	3049.8	0.0204123	0.0671625	0.303924	0.761186	0.999992	adm-4	X	7795046	7798287	-1
WBGene00000079	12434.5	-0.0406689	0.0560328	-0.725806	0.467958	0.999992	adr-1	I	7773180	7777652	1
WBGene00000080	10244	0.00274958	0.0547626	0.050209	0.959956	0.999992	adr-2	III	7230964	7232882	-1
WBGene00000081	22853.6	-0.0511008	0.148458	-0.344211	0.730688	0.999992	ads-1	III	295651	298556	-1
WBGene00000082	318.931	0.057449	0.370896	0.154892	0.876906	0.999992	adt-1	X	12678832	12689279	1
WBGene00000083	6382.77	-0.0124425	0.138309	-0.0899619	0.928318	0.999992	adt-2	X	7585587	7595414	1
WBGene00000084	866.308	0.141698	0.192802	0.734943	0.462374	0.999992	aex-1	I	7602307	7608245	1
WBGene00000085	110.357	-0.0948304	0.332179	-0.28548	0.775276	0.999992	aex-2	X	9650999	9653116	-1
WBGene00000086	1271.73	0.0204263	0.0823936	0.247911	0.804203	0.999992	aex-3	X	751211	759732	-1
WBGene00000088	1680.17	-0.0303261	0.13052	-0.232348	0.816268	0.999992	aex-5	I	14850054	14855827	-1
WBGene00000089	410.62	-0.0155111	0.143169	-0.108342	0.913725	0.999992	aex-6	I	13543079	13545188	-1
WBGene00000090	13196.7	-0.0350572	0.0825907	-0.424468	0.671224	0.999992	age-1	II	11519323	11527062	-1
WBGene00000092	3378.32	-0.0277804	0.126606	-0.219423	0.82632	0.999992	ags-3	X	5289728	5303512	-1
WBGene00000093	2132.6	-0.0446626	0.22759	-0.196242	0.844421	0.999992	agt-1	IV	13368368	13369417	-1
WBGene00000094	2709.38	-0.00238127	0.0914091	-0.0260507	0.979217	0.999992	agt-2	II	5371980	5373433	-1
WBGene00000095	1837.39	0.0389026	0.0745424	0.521886	0.60175	0.999992	aha-1	I	10193925	10197000	-1
WBGene00000096	78.0828	-0.0659693	0.36455	-0.180961	0.856398	0.999992	ahr-1	I	9522578	9531130	1
WBGene00000097	4027.92	0.0148927	0.0790895	0.188302	0.85064	0.999992	aip-1	V	14012333	14013644	1
WBGene00000098	25769	0.0133447	0.0745035	0.179115	0.857848	0.999992	air-1	V	8221410	8223587	1
WBGene00000099	9598.48	-0.0345192	0.059589	-0.579288	0.562395	0.999992	air-2	I	5937477	5938885	1
WBGene00000100	10393.3	0.0295257	0.0606554	0.486777	0.626416	0.999992	ajm-1	X	9078945	9113613	1
WBGene00000101	30624.5	0.0299151	0.124335	0.240601	0.809864	0.999992	aka-1	II	7472729	7478959	-1
WBGene00000102	22914.2	0.00529766	0.0731369	0.0724348	0.942256	0.999992	akt-1	V	10248907	10252895	1
WBGene00000103	924.397	0.0471013	0.197987	0.237901	0.811958	0.999992	akt-2	X	14147700	14152070	1
WBGene00000105	10721.7	0.0971951	0.0856665	1.13457	0.256553	0.999992	alg-1	X	13949114	13956261	1
WBGene00000106	13305.6	-0.00789715	0.0604788	-0.130577	0.89611	0.999992	alg-2	II	873176	879001	1
WBGene00000107	33580.8	-0.0344998	0.0961748	-0.358719	0.719805	0.999992	alh-1	III	5077765	5080665	1
WBGene00000108	16.3519	-0.0986516	0.895016	-0.110223	0.912232	0.999992	alh-2	V	1644169	1647728	1
WBGene00000109	12867.2	-0.0216097	0.0576653	-0.374744	0.707851	0.999992	alh-3	IV	11022603	11025870	1
WBGene00000110	18606.9	-0.00387651	0.0821508	-0.0471877	0.962364	0.999992	alh-4	V	6427212	6429927	-1
WBGene00000111	1033.05	0.0699274	0.147034	0.475587	0.634369	0.999992	alh-5	V	1996100	1999581	-1
WBGene00000112	9449.68	-0.0168443	0.150623	-0.111831	0.910958	0.999992	alh-6	II	1306240	1310133	-1
WBGene00000113	4377.85	-0.0139566	0.108983	-0.128063	0.898099	0.999992	alh-7	II	13485792	13491786	-1
WBGene00000114	101042	-0.0192714	0.0936534	-0.205773	0.836968	0.999992	alh-8	II	11728949	11731226	1
WBGene00000115	22923	-0.0456079	0.15015	-0.303749	0.761319	0.999992	alh-9	III	5856018	5859186	1
WBGene00000116	3101.35	-0.0416224	0.152291	-0.273309	0.784616	0.999992	alh-10	X	7140504	7143641	-1
WBGene00000117	6382.61	-0.0251659	0.0540362	-0.465722	0.641414	0.999992	alh-11	III	774321	778871	-1
WBGene00000118	7952.37	0.0101299	0.129953	0.0779505	0.937867	0.999992	alh-12	III	7454012	7455980	1
WBGene00000120	2068.3	-0.0946142	0.103859	-0.910986	0.362303	0.999992	aly-1	IV	9108931	9109753	1
WBGene00000121	24933.8	-0.0360369	0.0577131	-0.624415	0.532355	0.999992	aly-2	IV	9147468	9148579	1
WBGene00000122	24158.5	-0.0462325	0.107575	-0.429771	0.667362	0.999992	aly-3	IV	12123155	12124807	1
WBGene00000123	37315.8	-0.0341613	0.0838971	-0.407181	0.683875	0.999992	ama-1	IV	4248020	4258173	1
WBGene00000133	1617.06	-0.033069	0.190704	-0.173405	0.862333	0.999992	amt-1	X	4571448	4573914	1
WBGene00000134	41.8581	-0.160641	0.536143	-0.299624	0.764464	0.999992	amt-2	IV	13042391	13046858	1
WBGene00000135	146.768	0.0119053	0.325846	0.0365366	0.970855	0.999992	amt-3	II	8363196	8369159	-1
WBGene00000136	4394.96	-0.0594692	0.0709626	-0.838035	0.402011	0.999992	amt-4	X	4565302	4569393	1
WBGene00000137	1834.28	0.000101891	0.124812	0.000816356	0.999349	0.999992	amx-1	III	3822403	3826261	1
WBGene00000138	1482.77	0.0471596	0.164339	0.286966	0.774138	0.999992	amx-2	I	12759545	12764960	-1
WBGene00000139	447.877	-0.0131841	0.199543	-0.0660715	0.947321	0.999992	amx-3	V	20898840	20903441	-1
WBGene00000140	49518.6	-0.0384426	0.143793	-0.267346	0.789203	0.999992	anc-1	I	4318033	4359080	1
WBGene00000142	11313.7	0.0212182	0.0666451	0.318376	0.7502	0.999992	aos-1	V	10127492	10130295	-1
WBGene00000143	8479.75	0.0450796	0.108895	0.413973	0.678894	0.999992	apc-2	III	8080570	8083701	1
WBGene00000144	1762.18	-0.114804	0.158722	-0.723302	0.469494	0.999992	apc-10	V	10425362	10426399	-1
WBGene00000145	3144.95	-0.0301364	0.0594985	-0.506508	0.6125	0.999992	apc-11	III	4593769	4594426	-1
WBGene00000146	26404.4	0.0192095	0.0553231	0.347223	0.728424	0.999992	ape-1	V	11675942	11685268	1
WBGene00000147	3828.04	0.123569	0.154336	0.80065	0.423334	0.999992	aph-1	I	9232071	9233560	-1
WBGene00000148	7193.06	0.050001	0.14454	0.345932	0.729393	0.999992	aph-2	I	10340997	10345648	1
WBGene00000149	18742	0.00762024	0.0859134	0.0886967	0.929323	0.999992	apl-1	X	5112422	5116866	-1
WBGene00000150	2609.92	0.0298734	0.124468	0.240008	0.810324	0.999992	apm-1	I	5342180	5344724	-1
WBGene00000151	8799.59	-0.013325	0.0612377	-0.217595	0.827745	0.999992	apn-1	II	8047564	8049105	1
WBGene00000155	34952	-0.0224298	0.0400697	-0.55977	0.575637	0.999992	app-1	I	4964667	4967089	-1
WBGene00000156	15854.1	-0.000518769	0.0999137	-0.00519217	0.995857	0.999992	2020-04-01	I	8050043	8055489	1
WBGene00000157	1557.05	-0.0488522	0.0951662	-0.513336	0.607717	0.999992	aps-2	X	4458272	4459264	1
WBGene00000158	13203.7	-0.00127639	0.0442258	-0.0288607	0.976976	0.999992	apg-1	I	14406028	14417942	1
WBGene00000159	5634.7	0.0143093	0.0830756	0.172245	0.863245	0.999992	aps-1	V	6017970	6018886	1
WBGene00000160	13790.1	-0.014587	0.0561873	-0.259614	0.795161	0.999992	apb-1	III	2583953	2597034	-1
WBGene00000161	6757.78	0.0256174	0.0638827	0.401007	0.688415	0.999992	apa-2	X	9336819	9342970	1
WBGene00000162	9158.55	-0.00685616	0.0474403	-0.144522	0.885088	0.999992	apd-3	II	3532527	3546431	-1
WBGene00000163	14123.9	0.0131239	0.094039	0.139558	0.889009	0.999992	apb-3	I	7853750	7857850	1
WBGene00000164	2049.81	0.0281377	0.114116	0.24657	0.805241	0.999992	apm-3	X	954839	957762	1
WBGene00000165	4410.16	0.0530608	0.0788177	0.673208	0.500815	0.999992	aps-3	I	1154511	1156020	-1
WBGene00000166	106.252	-0.0848962	0.265882	-0.319301	0.749499	0.999992	apt-9	X	11068527	11071925	1
WBGene00000168	9909.15	-0.0407569	0.0794477	-0.513003	0.607949	0.999992	apx-1	V	3210189	3223218	1
WBGene00000169	3017.7	-0.0228665	0.152559	-0.149887	0.880854	0.999992	aqp-1	II	7235834	7238349	-1
WBGene00000170	9737.5	-0.0197789	0.130586	-0.151463	0.879611	0.999992	aqp-2	II	9258913	9261994	-1
WBGene00000171	29.2553	0.113175	0.51462	0.21992	0.825933	0.999992	aqp-3	IV	10961355	10966459	-1
WBGene00000172	1326.7	-0.0311769	0.226656	-0.137552	0.890595	0.999992	aqp-4	V	9737556	9739740	1
WBGene00000173	15.3048	0.336128	1.91294	0.175712	0.86052	0.999992	aqp-5	V	10491743	10493268	1
WBGene00000174	50.8859	0.201138	0.373181	0.538983	0.589898	0.999992	aqp-6	V	10648446	10651952	1
WBGene00000175	19253.5	0.0218345	0.162717	0.134187	0.893254	0.999992	aqp-7	X	3025505	3026976	1
WBGene00000176	7135.37	0.0243529	0.121225	0.20089	0.840785	0.999992	aqp-8	X	4702442	4704970	-1
WBGene00000177	491.13	0.167141	0.218024	0.76662	0.443308	0.999992	aqp-9	I	9605896	9609025	1
WBGene00000178	4725.96	-0.0113399	0.0770417	-0.147191	0.882981	0.999992	aqp-10	II	9768357	9769847	-1
WBGene00000179	4546.6	-0.0420641	0.0981453	-0.42859	0.668221	0.999992	aqp-11	III	13673280	13674746	1
WBGene00000180	1581.88	-0.0426904	0.0924712	-0.461661	0.644324	0.999992	arc-1	II	9674978	9677210	1
WBGene00000181	20990.8	-0.0131572	0.105612	-0.124581	0.900855	0.999992	ard-1	IV	11131279	11133785	1
WBGene00000182	40240.8	0.0812241	0.0853828	0.951293	0.341456	0.999992	arf-1.2	III	5714861	5717585	1
WBGene00000183	42959.8	0.00118639	0.0320416	0.0370266	0.970464	0.999992	arf-3	IV	7982526	7983919	1
WBGene00000184	4417.33	-0.026373	0.0621818	-0.424128	0.671472	0.999992	arf-6	IV	16947120	16949734	1
WBGene00000185	1.892	1.55068	2.9561	0.524568	0.599883	0.999992	arg-1	X	1786907	1788405	1
WBGene00000186	5952.93	-0.0292212	0.120842	-0.241813	0.808925	0.999992	ark-1	IV	12622093	12631022	-1
WBGene00000187	4211.52	0.00544384	0.0682456	0.0797684	0.936421	0.999992	arl-1	II	8581945	8583080	1
WBGene00000188	137.024	0.470007	0.371206	1.26616	0.205455	0.999992	arl-3	II	14606472	14608342	1
WBGene00000189	1832.2	0.0295303	0.157461	0.18754	0.851237	0.999992	arl-5	III	9823242	9824132	1
WBGene00000190	98.3944	-0.133107	0.463106	-0.287423	0.773788	0.999992	arf-1.1	IV	7634786	7635710	1
WBGene00000191	52.8948	-0.335962	0.435885	-0.770759	0.44085	0.999992	arl-7	X	14980954	14981675	-1
WBGene00000192	14517.4	0.0378298	0.0931689	0.406035	0.684717	0.999992	arl-8	IV	14798149	14799229	1
WBGene00000193	28.3737	-0.34823	0.646916	-0.538292	0.590375	0.999992	arl-6	III	4813309	4814814	-1
WBGene00000195	1809.44	-0.0835713	0.114002	-0.733072	0.463515	0.999992	arr-1	X	950782	954233	1
WBGene00000196	5783.87	-0.00867719	0.0581535	-0.149212	0.881387	0.999992	aars-1	II	11460215	11464129	-1
WBGene00000197	63062.4	-0.0291074	0.0534775	-0.544292	0.586241	0.999992	aars-2	I	3983171	3986915	1
WBGene00000198	25913.3	-0.00757156	0.100551	-0.0753007	0.939975	0.999992	art-1	II	6970668	6972235	-1
WBGene00000199	12372.2	-0.046935	0.0588664	-0.797314	0.425269	0.999992	arx-1	I	2883546	2893718	-1
WBGene00000200	14611.3	0.0286349	0.0550215	0.520431	0.602764	0.999992	arx-2	V	10335443	10338355	-1
WBGene00000201	10346.1	-0.0154128	0.0734842	-0.209744	0.833868	0.999992	arx-3	III	12052424	12058458	-1
WBGene00000202	7495.63	-0.0447642	0.0654173	-0.684287	0.493794	0.999992	exos-4.2	III	860198	861324	1
WBGene00000203	5308.16	-0.0482863	0.0727739	-0.663511	0.507004	0.999992	arx-5	III	12816789	12818100	-1
WBGene00000204	7114.18	-0.00803927	0.0594916	-0.135133	0.892507	0.999992	arx-6	III	4878658	4879643	1
WBGene00000205	3275.56	-0.00129038	0.0769923	-0.0167599	0.986628	0.999992	arx-7	I	3069325	3070150	-1
WBGene00000206	34286.9	-0.0182359	0.0515571	-0.353702	0.723562	0.999992	asb-1	III	4594543	4595944	-1
WBGene00000207	28704.5	-0.00894112	0.130352	-0.0685924	0.945314	0.999992	asb-2	X	4469743	4471476	1
WBGene00000208	4908.99	0.00719135	0.0625562	0.114958	0.908478	0.999992	trip-4	II	15039404	15048904	1
WBGene00000209	20024.1	-0.0311461	0.0991887	-0.314009	0.753515	0.999992	asg-1	I	8692946	8693468	1
WBGene00000210	12759.6	-0.0151896	0.135494	-0.112106	0.91074	0.999992	asg-2	X	6841258	6842129	1
WBGene00000211	936.776	0.0589629	0.161995	0.36398	0.715873	0.999992	asm-1	II	6910031	6912697	1
WBGene00000212	1265.06	-0.00458383	0.171006	-0.026805	0.978615	0.999992	asm-2	X	11321079	11324251	-1
WBGene00000213	106.3	-0.142251	0.642193	-0.221508	0.824697	0.999992	asm-3	IV	520214	523809	-1
WBGene00000214	260284	-0.0330755	0.07379	-0.448239	0.653981	0.999992	asp-1	V	19049461	19050825	-1
WBGene00000215	71875.3	-0.0301378	0.0456016	-0.660892	0.508681	0.999992	asp-2	V	9203077	9204734	1
WBGene00000216	133411	-0.0476735	0.0649781	-0.733686	0.46314	0.999992	asp-3	X	6791064	6792715	1
WBGene00000217	52499.6	-0.0660173	0.0755626	-0.873678	0.382294	0.999992	asp-4	X	13218977	13221462	-1
WBGene00000218	51959.4	-0.0319561	0.124428	-0.256824	0.797315	0.999992	asp-5	V	8272375	8274046	1
WBGene00000219	180137	-0.0334327	0.126813	-0.263638	0.792059	0.999992	asp-6	V	8267511	8268937	-1
WBGene00000220	574.252	0.143045	0.289538	0.494046	0.621273	0.999992	atf-2	II	8751986	8753939	1
WBGene00000221	8548.33	0.00611372	0.101751	0.0600852	0.952088	0.999992	atf-5	X	14808846	14810849	-1
WBGene00000222	1667.33	0.0381009	0.0972362	0.391838	0.695178	0.999992	atf-6	X	12480948	12484904	1
WBGene00000223	20574.4	0.141235	0.108707	1.29923	0.193865	0.999992	atf-7	III	4491627	4499043	-1
WBGene00000224	4156.79	-0.0169699	0.109483	-0.155	0.876821	0.999992	atgp-1	IV	17269342	17272183	1
WBGene00000225	2962.11	-0.0488242	0.130589	-0.373878	0.708495	0.999992	atgp-2	II	14640096	14644083	-1
WBGene00000226	17906.3	0.0249782	0.158281	0.157809	0.874607	0.999992	atl-1	V	9634861	9645595	-1
WBGene00000227	7705.31	-0.0231575	0.0530602	-0.436439	0.662518	0.999992	atm-1	I	183364	208465	1
WBGene00000228	22795.6	0.0185077	0.110343	0.167729	0.866796	0.999992	atn-1	V	12478413	12484442	1
WBGene00000229	297303	-0.0118417	0.0875368	-0.135277	0.892393	0.999992	atp-2	III	5228417	5230536	1
WBGene00000230	64404.9	0.00617931	0.0717668	0.0861026	0.931385	0.999992	atp-3	I	5428469	5429908	-1
WBGene00000231	31486.2	0.00109535	0.0477266	0.0229506	0.98169	0.999992	atx-2	III	10461389	10468051	1
WBGene00000232	476.71	-0.0134409	0.19821	-0.0678114	0.945936	0.999992	avr-14	I	5967250	5973320	-1
WBGene00000233	1235.16	0.0736321	0.10358	0.710873	0.477163	0.999992	avr-15	V	13498786	13511718	-1
WBGene00000235	9565.69	0.0379558	0.0768986	0.493583	0.621601	0.999992	baf-1	III	9467464	9468058	1
WBGene00000236	4792.41	0.047773	0.0633063	0.754633	0.450469	0.999992	bag-1	I	6563629	6564451	-1
WBGene00000237	2213.78	-0.00986809	0.0878701	-0.112303	0.910583	0.999992	bam-2	I	2949600	2957910	-1
WBGene00000238	1410.16	-0.0311142	0.0809717	-0.38426	0.700785	0.999992	bar-1	X	7166005	7170625	-1
WBGene00000239	2371.44	-0.0780591	0.157165	-0.496668	0.619423	0.999992	bas-1	III	5612274	5614700	1
WBGene00000240	9363.44	-0.0544686	0.106282	-0.512493	0.608306	0.999992	pah-1	II	8762668	8766922	-1
WBGene00000241	56.5285	-0.00376426	0.513745	-0.0073271	0.994154	0.999992	bbs-1	I	14371142	14376025	-1
WBGene00000242	44.905	0.220694	0.528132	0.417877	0.676037	0.999992	bbs-2	IV	7934097	7937746	1
WBGene00000244	117.201	-0.161153	0.386678	-0.416763	0.676852	0.999992	bbs-8	V	6762476	6765072	-1
WBGene00000245	3108.27	-0.0251333	0.0997182	-0.252043	0.801008	0.999992	bca-1	X	6201875	6204922	-1
WBGene00000246	390.885	-0.101662	0.14552	-0.698614	0.484794	0.999992	bcc-1	IV	11086074	11092552	-1
WBGene00000247	3013.69	-0.00148531	0.215873	-0.00688046	0.99451	0.999992	bec-1	IV	5661141	5664425	-1
WBGene00000248	4908.93	-0.0275429	0.0972258	-0.283288	0.776956	0.999992	ben-1	III	3537688	3541628	-1
WBGene00000249	3731.31	0.0281682	0.0954794	0.295019	0.76798	0.999992	bir-1	V	11644760	11645370	1
WBGene00000250	4428.44	0.00135877	0.0923768	0.014709	0.988264	0.999992	bir-2	V	13568850	13570030	1
WBGene00000251	381.784	0.295481	0.558558	0.529006	0.596801	0.999992	bli-1	II	10708765	10712156	1
WBGene00000252	141.013	0.201358	0.872942	0.230666	0.817574	0.999992	bli-2	II	5651394	5652449	-1
WBGene00000253	3162.61	0.00124049	0.0847465	0.0146377	0.988321	0.999992	bli-3	I	146486	154850	-1
WBGene00000254	28988.9	-0.00219513	0.0449421	-0.0488435	0.961044	0.999992	bli-4	I	6342231	6356678	1
WBGene00000255	46.3739	0.236379	0.418731	0.564513	0.572405	0.999992	bli-5	III	13427642	13429713	-1
WBGene00000256	2108	0.0342576	0.749383	0.0457144	0.963538	0.999992	bli-6	IV	6377065	6378195	1
WBGene00000257	17595.7	-0.0801797	0.0899651	-0.891231	0.372805	0.999992	bmk-1	V	14453305	14456998	-1
WBGene00000259	6121.83	0.0294825	0.100854	0.29233	0.770034	0.999992	bpl-1	II	6274115	6279699	1
WBGene00000262	764.343	-0.100211	0.14057	-0.712891	0.475913	0.999992	bra-1	X	13598449	13599687	1
WBGene00000263	20072.3	-0.000390416	0.139808	-0.00279252	0.997772	0.999992	F23H11.5	III	909957	910589	-1
WBGene00000264	5676.32	-0.0020403	0.153101	-0.0133265	0.989367	0.999992	brc-1	III	3853026	3862958	-1
WBGene00000265	6984.32	-0.011701	0.0898704	-0.130199	0.896409	0.999992	brd-1	III	6885204	6889523	-1
WBGene00000266	2613.71	-0.0262916	0.0729773	-0.360271	0.718645	0.999992	bre-1	IV	8987130	8990444	1
WBGene00000267	339.045	0.0130563	0.243125	0.053702	0.957173	0.999992	bre-2	III	13134014	13139614	-1
WBGene00000268	11184.5	0.00960986	0.0705187	0.136274	0.891605	0.999992	bre-3	III	9469920	9485451	-1
WBGene00000269	2439.96	-0.00326444	0.07385	-0.0442036	0.964742	0.999992	bre-4	I	1621346	1628476	-1
WBGene00000270	2340.18	-0.0206283	0.163374	-0.126265	0.899522	0.999992	bre-5	IV	12049862	12051226	-1
WBGene00000271	11471.7	-0.0135285	0.0785506	-0.172227	0.863259	0.999992	brf-1	II	7305861	7308738	1
WBGene00000272	72.5062	-0.163036	0.532112	-0.306393	0.759305	0.999992	bro-1	I	5186926	5188995	1
WBGene00000273	32316.9	-0.0140402	0.152635	-0.0919852	0.92671	0.999992	brp-1	III	12020552	12025325	1
WBGene00000274	13067.8	-0.0424967	0.0538639	-0.788965	0.430132	0.999992	btf-1	II	13200165	13215701	1
WBGene00000275	31600.4	-0.0786121	0.0731836	-1.07418	0.282744	0.999992	bub-1	I	7251941	7255223	1
WBGene00000276	14636.3	-0.0512715	0.0772389	-0.663805	0.506815	0.999992	byn-1	III	6932001	6935862	1
WBGene00000277	6898.87	0.0026216	0.0656586	0.0399278	0.968151	0.999992	cab-1	X	12199655	12213049	-1
WBGene00000279	262.504	-0.00529066	0.280716	-0.018847	0.984963	0.999992	cah-1	III	5083206	5085289	-1
WBGene00000280	97.1845	-0.0238965	0.269883	-0.0885438	0.929444	0.999992	cah-2	II	7480751	7483109	-1
WBGene00000281	4898.41	0.00720366	0.0667969	0.107844	0.914119	0.999992	cah-3	X	16487481	16489397	1
WBGene00000282	10766.3	0.0332518	0.095275	0.349008	0.727083	0.999992	cah-4	X	13542574	13544599	1
WBGene00000283	3412.36	-0.0394393	0.160758	-0.245333	0.806199	0.999992	cah-5	X	7020033	7023950	1
WBGene00000284	316.442	-0.0376282	0.178756	-0.210501	0.833277	0.999992	cah-6	I	3629471	3631112	1
WBGene00000285	352.393	0.0306782	0.197725	0.155156	0.876699	0.999992	cal-1	V	12514875	12517205	-1
WBGene00000286	327.579	-0.0332746	0.191035	-0.17418	0.861724	0.999992	cal-2	II	8960714	8961577	1
WBGene00000287	239.678	0.154976	0.336862	0.460058	0.645475	0.999992	cal-3	IV	3829546	3835165	-1
WBGene00000288	195.54	0.131123	0.337873	0.388084	0.697954	0.999992	cal-4	IV	10521422	10530597	1
WBGene00000289	11029.1	0.0102596	0.0954292	0.10751	0.914385	0.999992	cam-1	II	9295918	9310304	-1
WBGene00000292	12673.4	0.00590431	0.0567734	0.103998	0.917171	0.999992	cap-1	IV	7228403	7230223	-1
WBGene00000293	15288.8	0.0241138	0.0475886	0.506714	0.612356	0.999992	cap-2	II	10869196	10870827	1
WBGene00000294	10661.9	0.0294773	0.080605	0.3657	0.714589	0.999992	cas-1	X	16807461	16813673	-1
WBGene00000295	112.599	0.133603	0.387592	0.344699	0.73032	0.999992	cat-1	X	5705719	5710625	-1
WBGene00000296	51.8669	0.199357	0.486239	0.409999	0.681807	0.999992	cat-2	II	257819	261063	1
WBGene00000298	6056.21	-0.0453973	0.122135	-0.371697	0.710119	0.999992	cat-4	V	10564880	10566445	1
WBGene00000301	10376.1	-0.0845863	0.135693	-0.623368	0.533043	0.999992	cav-1	IV	9772510	9773470	1
WBGene00000302	171.039	-0.0839304	0.242779	-0.345707	0.729563	0.999992	cav-2	V	13557104	13559922	1
WBGene00000366	31271.1	0.0110813	0.0480447	0.230646	0.81759	0.999992	cbp-1	III	9766516	9774825	1
WBGene00000367	1455.49	0.0114223	0.0952138	0.119965	0.904511	0.999992	cca-1	X	7847682	7875954	-1
WBGene00000368	2200.72	0.0379482	0.132007	0.287472	0.773751	0.999992	ccb-1	I	3641668	3647009	-1
WBGene00000369	12224.2	0.0186592	0.0492488	0.378877	0.70478	0.999992	ccf-1	III	11918828	11920237	-1
WBGene00000370	7253.46	-0.0582386	0.13746	-0.423676	0.671802	0.999992	ccg-1	IV	15270160	15275835	-1
WBGene00000371	31429.8	-0.0150707	0.127961	-0.117776	0.906245	0.999992	cox-5B	I	9788749	9790050	1
WBGene00000372	31.9422	0.333935	0.4786	0.697734	0.485344	0.999992	cyp-13A7	II	9803620	9805510	1
WBGene00000373	3343.23	-0.00639938	0.0819552	-0.0780838	0.937761	0.999992	cyp-14A5	V	5421018	5423488	-1
WBGene00000374	2886.98	-0.0121438	0.0734893	-0.165246	0.868751	0.999992	cyp-31A1	IV	9101773	9103851	-1
WBGene00000375	5395.4	-0.0247211	0.0730575	-0.338379	0.735078	0.999992	cyp-44A1	II	5503966	5506115	1
WBGene00000376	31997.7	0.00140816	0.10268	0.013714	0.989058	0.999992	ccr-4	IV	12361542	12371852	1
WBGene00000377	67327.9	-0.0163873	0.0417475	-0.392534	0.694664	0.999992	cct-1	II	8185443	8187601	1
WBGene00000378	54929.1	-0.0379835	0.0498316	-0.762238	0.445918	0.999992	cct-2	II	8927741	8929820	1
WBGene00000379	57749	-0.00761276	0.0409331	-0.185981	0.85246	0.999992	cct-4	II	8283667	8285711	1
WBGene00000380	76621.1	-0.0140144	0.0513118	-0.273123	0.784759	0.999992	cct-5	III	4499191	4508114	-1
WBGene00000381	48198.9	-0.029212	0.0431759	-0.676581	0.498672	0.999992	cct-6	III	5853532	5855687	-1
WBGene00000382	12562.9	0.0153857	0.0692429	0.222199	0.824159	0.999992	cdc-6	I	4268070	4270287	-1
WBGene00000383	19123.6	-0.000900072	0.102169	-0.00880961	0.992971	0.999992	cdc-14	II	5589186	5593628	-1
WBGene00000386	28098.9	-0.0118401	0.0664908	-0.178071	0.858667	0.999992	cdc-25.1	I	6469386	6471995	-1
WBGene00000387	6661.71	-0.0778963	0.182772	-0.426195	0.669966	0.999992	cdc-25.2	V	1567076	1585532	1
WBGene00000388	4274.33	-0.00337204	0.109739	-0.0307279	0.975487	0.999992	cdc-25.3	III	8916351	8917929	-1
WBGene00000389	44.3504	0.021091	0.859734	0.024532	0.980428	0.999992	cdc-25.4	II	10188263	10189469	-1
WBGene00000390	22537.3	0.0424559	0.0796511	0.533023	0.594018	0.999992	cdc-42	II	7616452	7618245	1
WBGene00000391	523.228	-0.0487779	0.247132	-0.197376	0.843533	0.999992	cdd-1	X	8208748	8211149	-1
WBGene00000392	3854.73	-0.0157783	0.0960535	-0.164266	0.869522	0.999992	cdd-2	IV	7547118	7547893	-1
WBGene00000393	2945.96	0.058215	0.0922217	0.631251	0.527877	0.999992	cdf-1	X	6499928	6504613	-1
WBGene00000395	1580.87	0.0446781	0.243084	0.183797	0.854173	0.999992	cdh-3	III	7741326	7754448	-1
WBGene00000396	11498.2	0.0194718	0.126024	0.154508	0.877209	0.999992	cdh-4	III	4520363	4536991	1
WBGene00000397	604.29	-0.0755194	0.211917	-0.356363	0.721568	0.999992	cdh-5	IV	8668941	8676542	1
WBGene00000399	62.1713	0.112254	0.558926	0.200839	0.840824	0.999992	cdh-7	II	14843177	14850905	1
WBGene00000401	237.81	-0.0184996	0.255048	-0.0725336	0.942177	0.999992	cdh-9	X	16595238	16602238	1
WBGene00000402	218.337	0.0571611	0.512034	0.111635	0.911113	0.999992	cdh-10	IV	2436505	2463405	-1
WBGene00000403	4756.21	0.0195939	0.0909066	0.215539	0.829347	0.999992	casy-1	II	5945418	5956683	-1
WBGene00000405	28307.5	-0.0389268	0.0621803	-0.62603	0.531295	0.999992	cdk-1	III	9747432	9748852	1
WBGene00000406	1053.07	0.11109	0.125227	0.887111	0.375019	0.999992	cdk-4	X	13515871	13518911	-1
WBGene00000407	5569.78	-0.0273525	0.096114	-0.284584	0.775963	0.999992	cdk-5	III	13464687	13466390	-1
WBGene00000408	7475.91	0.0142063	0.087569	0.162229	0.871125	0.999992	cdk-7	I	2281504	2291183	-1
WBGene00000409	6677.87	0.0292805	0.109265	0.267976	0.788718	0.999992	cdk-8	I	8702478	8705825	1
WBGene00000410	4094.05	0.00283105	0.0749328	0.0377812	0.969862	0.999992	cdk-9	I	11323527	11333152	1
WBGene00000411	29209.1	-0.0143983	0.0804342	-0.179007	0.857932	0.999992	cdl-1	II	10785452	10787272	1
WBGene00000412	74.6287	0.355748	0.45921	0.774696	0.438519	0.999992	cdr-1	V	15921309	15922818	1
WBGene00000413	8191.06	-0.0299162	0.0747668	-0.400127	0.689063	0.999992	cdt-1	I	3223160	3228104	-1
WBGene00000414	2608.65	-0.000983343	0.0754906	-0.013026	0.989607	0.999992	cec-1	III	8426334	8428583	1
WBGene00000415	10329.3	-0.0247984	0.0462809	-0.535823	0.592081	0.999992	ced-1	I	11851566	11868105	-1
WBGene00000416	7379.59	-0.0299515	0.0826601	-0.362345	0.717094	0.999992	ced-2	IV	1597316	1601620	1
WBGene00000417	23589.4	0.00144253	0.0657371	0.0219439	0.982493	0.999992	ced-3	IV	13198372	13204133	-1
WBGene00000418	5544.69	0.00223166	0.112647	0.0198111	0.984194	0.999992	ced-4	III	4852313	4855177	1
WBGene00000419	16980.3	0.0262797	0.141017	0.186358	0.852164	0.999992	ced-5	IV	10484110	10492952	1
WBGene00000420	6068.59	-0.0178897	0.0692717	-0.258253	0.796211	0.999992	ced-6	III	5595771	5598066	1
WBGene00000421	22099.9	0.0118836	0.110156	0.10788	0.914091	0.999992	ced-7	III	9570394	9580081	-1
WBGene00000422	620.719	0.128066	0.192703	0.664574	0.506323	0.999992	ced-8	X	8414015	8416919	-1
WBGene00000423	7904.6	0.00485997	0.0512831	0.0947676	0.924499	0.999992	ced-9	III	10335172	10337536	1
WBGene00000424	6180.29	0.0098897	0.0530313	0.186488	0.852062	0.999992	ced-10	IV	3506328	3509527	-1
WBGene00000425	1380.75	0.00337383	0.130044	0.0259437	0.979302	0.999992	ced-11	III	9119559	9125153	1
WBGene00000426	9049.72	0.076258	0.0980552	0.777705	0.436743	0.999992	ced-12	I	10222881	10227009	-1
WBGene00000428	30.3865	-0.166278	0.457165	-0.363716	0.71607	0.999992	ceh-1	X	4653434	4654157	-1
WBGene00000429	31.9447	-0.0262557	0.533215	-0.0492403	0.960728	0.999992	ceh-2	I	6046832	6050462	-1
WBGene00000430	64.1703	-0.0296241	0.322961	-0.0917266	0.926915	0.999992	ceh-5	I	9727169	9728034	1
WBGene00000431	204.736	-0.0558036	0.213419	-0.261474	0.793727	0.999992	ceh-6	I	8498114	8502412	-1
WBGene00000432	1.5991	-0.00165576	3.8393	-0.000431266	0.999656	0.999992	ceh-7	II	8703368	8703829	-1
WBGene00000433	29.9718	0.410078	0.756561	0.54203	0.587798	0.999992	ceh-8	I	8245722	8250896	-1
WBGene00000434	2.15341	-0.00125632	3.81069	-0.000329682	0.999737	0.999992	ceh-9	I	565436	566414	-1
WBGene00000435	104.762	-0.137742	0.29436	-0.467937	0.63983	0.999992	ceh-10	III	5799073	5801109	1
WBGene00000437	649.252	-0.112233	0.136738	-0.820786	0.411768	0.999992	ceh-13	III	7555617	7558208	1
WBGene00000438	161.49	0.0907448	0.272993	0.332407	0.739582	0.999992	ceh-14	X	7528616	7532732	-1
WBGene00000439	122.866	-0.0982817	0.321543	-0.305656	0.759866	0.999992	ceh-16	III	8622658	8626312	1
WBGene00000440	15.8471	-0.134845	0.848522	-0.158918	0.873734	0.999992	ceh-17	I	4568962	4570027	-1
WBGene00000441	1150.89	-0.0461085	0.137693	-0.334864	0.737728	0.999992	ceh-18	X	3843367	3857797	-1
WBGene00000442	101.108	-0.0506082	0.286158	-0.176854	0.859623	0.999992	ceh-19	IV	7953509	7955898	-1
WBGene00000443	1617.58	-0.0370735	0.148955	-0.248891	0.803445	0.999992	ceh-20	III	6979884	6981785	1
WBGene00000444	2474.78	0.039543	0.0708146	0.558401	0.57657	0.999992	ceh-21	X	1848795	1852736	-1
WBGene00000445	145.264	0.135442	0.242206	0.5592	0.576026	0.999992	ceh-22	V	10672459	10675644	1
WBGene00000446	19.3105	0.354881	0.648225	0.547465	0.584059	0.999992	ceh-23	III	7839594	7841491	1
WBGene00000447	42.5969	-0.0125891	0.441066	-0.0285425	0.977229	0.999992	ceh-24	V	13813309	13815272	1
WBGene00000448	467.339	0.0215624	0.312725	0.0689501	0.945029	0.999992	pros-1	III	8067289	8071455	1
WBGene00000449	334.194	0.142397	0.295037	0.482641	0.629351	0.999992	ceh-27	V	11661670	11665085	-1
WBGene00000451	96.1353	-0.0800573	0.29617	-0.270309	0.786923	0.999992	ceh-30	X	3063585	3065551	1
WBGene00000452	46.1353	0.329681	0.497494	0.662682	0.507534	0.999992	ceh-31	X	3068650	3070396	-1
WBGene00000453	1349.99	0.0143286	0.129893	0.110311	0.912163	0.999992	ceh-32	V	11701764	11705400	-1
WBGene00000454	30.5747	-0.0429473	0.618363	-0.0694533	0.944629	0.999992	ceh-33	V	5323204	5324616	-1
WBGene00000455	288.972	-0.0708532	0.312381	-0.226817	0.820566	0.999992	ceh-34	V	5315513	5319577	-1
WBGene00000457	239.701	0.0588492	0.17331	0.339559	0.734188	0.999992	ceh-36	X	14183449	14185597	-1
WBGene00000458	681.987	0.0881406	0.298128	0.295647	0.7675	0.999992	ceh-37	X	14197373	14209153	-1
WBGene00000459	16510.1	0.129312	0.125251	1.03243	0.301872	0.999992	ceh-38	II	6951640	6955399	1
WBGene00000460	3083.76	0.076126	0.0904472	0.841662	0.399977	0.999992	ceh-39	X	1853874	1856189	-1
WBGene00000461	515.784	-0.031457	0.190806	-0.164864	0.869051	0.999992	ceh-40	X	12318240	12320777	-1
WBGene00000462	1341.26	0.0611935	0.110569	0.553441	0.579961	0.999992	ceh-41	X	1846608	1848675	-1
WBGene00000463	698.97	0.112883	0.18959	0.595408	0.551571	0.999992	ceh-43	III	4446637	4449943	-1
WBGene00000464	13107	0.00431102	0.0478755	0.0900465	0.92825	0.999992	ceh-44	III	2530615	2546420	1
WBGene00000465	247029	-0.0354862	0.0582186	-0.609534	0.54217	0.999992	cpg-1	III	4489359	4491392	1
WBGene00000466	7002.44	-0.00782137	0.0927282	-0.0843473	0.93278	0.999992	cel-1	I	9665194	9668664	1
WBGene00000467	7545.48	0.0345945	0.119691	0.289032	0.772557	0.999992	cep-1	I	8324120	8328853	1
WBGene00000468	72.8837	-0.0323536	0.374233	-0.0864531	0.931106	0.999992	ces-1	I	8633925	8636044	1
WBGene00000469	563.1	0.0407833	0.250671	0.162697	0.870757	0.999992	ces-2	I	14961501	14965361	1
WBGene00000472	54449.2	0.0144344	0.0763712	0.189003	0.85009	0.999992	cey-1	II	11039348	11041206	-1
WBGene00000473	242242	-0.0540285	0.0824667	-0.655156	0.512367	0.999992	cey-2	I	5619569	5620668	1
WBGene00000474	101072	-0.0559032	0.0628208	-0.889883	0.373528	0.999992	cey-3	I	5571787	5573019	-1
WBGene00000475	59734.7	-0.175215	0.131125	-1.33624	0.181471	0.999992	cey-4	III	10866870	10868727	-1
WBGene00000476	226.631	0.0499454	0.235991	0.211641	0.832387	0.999992	cfi-1	I	9994731	9999928	-1
WBGene00000477	221.213	0.00918533	0.171638	0.0535158	0.957321	0.999992	cft-1	V	5538800	5545766	1
WBGene00000478	844.728	0.0486449	0.0978272	0.497253	0.61901	0.999992	cfz-2	V	3441504	3444877	-1
WBGene00000479	310037	-0.0127013	0.0572141	-0.221996	0.824317	0.999992	cgh-1	III	7495320	7497832	-1
WBGene00000480	15849.1	-0.0238783	0.0461359	-0.517563	0.604763	0.999992	cgp-1	V	118043	122966	-1
WBGene00000481	236.965	0.0360649	0.20269	0.177932	0.858777	0.999992	cha-1	IV	3613934	3624697	-1
WBGene00000482	8306.45	0.00973086	0.0707645	0.137511	0.890627	0.999992	chd-3	X	12846437	12852601	-1
WBGene00000483	7.9955	-0.000407912	3.39306	-0.000120219	0.999904	0.999992	che-1	I	6517575	6520879	-1
WBGene00000484	54.9831	0.234816	0.616232	0.381051	0.703165	0.999992	che-2	X	481378	486504	1
WBGene00000485	241.637	-0.0256265	0.297049	-0.0862704	0.931251	0.999992	che-3	I	8062059	8081671	-1
WBGene00000487	15.183	-0.447137	0.938868	-0.476251	0.633896	0.999992	che-6	IV	2104056	2111408	-1
WBGene00000488	77.2784	-0.224058	0.421313	-0.531809	0.594858	0.999992	che-7	V	7961539	7968899	-1
WBGene00000490	70.1014	-0.0579443	0.617955	-0.0937679	0.925294	0.999992	che-11	V	12144295	12150689	-1
WBGene00000491	112.973	-0.203236	0.382057	-0.531954	0.594758	0.999992	che-12	V	10299473	10307354	-1
WBGene00000492	65.4458	0.177574	0.423272	0.419527	0.674831	0.999992	che-13	I	10507000	10515506	-1
WBGene00000493	206.152	0.0383137	0.321141	0.119305	0.905034	0.999992	che-14	I	5746633	5754278	1
WBGene00000496	50747.6	-0.0176502	0.107907	-0.163569	0.87007	0.999992	chs-1	I	7554855	7559916	1
WBGene00000497	1078.42	-0.0364769	0.137897	-0.264522	0.791377	0.999992	chs-2	II	196985	211941	1
WBGene00000498	6152.58	0.0365081	0.103081	0.35417	0.723212	0.999992	chk-1	V	3757047	3759469	-1
WBGene00000499	2509.33	-0.0801498	0.0884638	-0.906019	0.364926	0.999992	chk-2	V	19908765	19916023	-1
WBGene00000500	7067.67	0.0202323	0.0630521	0.320883	0.748299	0.999992	chn-1	I	6181314	6183913	-1
WBGene00000501	182.606	0.0821771	0.260673	0.31525	0.752572	0.999992	cho-1	IV	13209729	13214566	-1
WBGene00000502	7380.96	-0.0300068	0.0696356	-0.430911	0.666533	0.999992	chp-1	I	5103581	5104956	-1
WBGene00000503	5748.65	-0.00285009	0.0847911	-0.0336131	0.973186	0.999992	cht-1	X	3397613	3400017	-1
WBGene00000506	2203.59	0.0928107	0.200082	0.463862	0.642746	0.999992	cic-1	III	2394325	2401308	-1
WBGene00000507	4695.3	0.0207987	0.0931116	0.223373	0.823245	0.999992	cit-1.1	III	8005935	8009821	-1
WBGene00000508	5904.63	-0.0123162	0.0878737	-0.140158	0.888535	0.999992	cit-1.2	III	8010778	8013774	1
WBGene00000509	7664.88	0.00903633	0.0937368	0.096401	0.923202	0.999992	cka-1	IV	9731737	9737621	-1
WBGene00000510	551.807	0.0484639	0.127343	0.380579	0.703516	0.999992	cka-2	X	4286737	4291494	1
WBGene00000511	470.073	0.104852	0.234029	0.44803	0.654132	0.999992	ckb-1	III	4365285	4367469	1
WBGene00000512	1788.31	-0.025598	0.100939	-0.253599	0.799805	0.999992	ckb-2	III	4367832	4370160	1
WBGene00000513	10.679	0.125751	1.66057	0.0757277	0.939636	0.999992	ckb-3	III	4370885	4372820	1
WBGene00000514	952.561	-0.00785188	0.0993999	-0.0789928	0.937038	0.999992	ckb-4	V	2106398	2109418	-1
WBGene00000515	2331.58	0.0611035	0.101716	0.600724	0.548024	0.999992	ckc-1	X	3576608	3578830	1
WBGene00000516	901.786	-0.0952347	0.171511	-0.555269	0.57871	0.999992	cki-1	II	7811240	7812105	1
WBGene00000517	7054.13	-0.0207943	0.0500861	-0.415172	0.678016	0.999992	cki-2	II	7816509	7820301	1
WBGene00000518	287.541	0.0240523	0.159461	0.150835	0.880106	0.999992	ckk-1	III	5635479	5654558	1
WBGene00000519	8003.6	-0.0184897	0.0600048	-0.308138	0.757978	0.999992	cku-70	III	11154827	11168820	1
WBGene00000520	7130.12	0.0264689	0.12191	0.217118	0.828116	0.999992	cku-80	III	4419848	4423368	1
WBGene00000521	31.1733	0.35323	0.711117	0.496726	0.619382	0.999992	cky-1	V	12736703	12741211	1
WBGene00000522	1265.85	0.0588628	0.268058	0.21959	0.826191	0.999992	clc-1	X	11047446	11049271	1
WBGene00000523	182.91	-0.0675508	0.359967	-0.187658	0.851145	0.999992	clc-2	X	7431472	7433548	1
WBGene00000524	269.919	-0.00357428	0.369422	-0.00967535	0.99228	0.999992	clc-3	X	3373247	3374740	-1
WBGene00000525	8.17105	1.34472	1.20557	1.11542	0.264671	0.999992	clc-4	X	10782996	10783907	-1
WBGene00000526	282.361	0.180086	0.196537	0.916297	0.359511	0.999992	clc-5	X	7433632	7435733	1
WBGene00000527	6327.85	-0.00068001	0.110806	-0.00613693	0.995103	0.999992	cle-1	I	8705670	8724279	-1
WBGene00000528	7488.58	0.0136377	0.0834223	0.163478	0.870142	0.999992	clh-1	II	11846508	11854743	-1
WBGene00000529	277.846	0.0691203	0.209267	0.330297	0.741176	0.999992	clh-2	II	11358447	11370311	1
WBGene00000530	3587.63	0.00621864	0.116952	0.0531725	0.957594	0.999992	clh-3	II	7217955	7225648	-1
WBGene00000531	157.182	-0.0330992	0.321118	-0.103075	0.917903	0.999992	clh-4	X	4094867	4100573	-1
WBGene00000532	14686.3	-0.01157	0.0769057	-0.150445	0.880414	0.999992	clh-5	II	9094710	9098605	-1
WBGene00000533	7785.5	0.0315483	0.0981689	0.321367	0.747932	0.999992	clh-6	V	12060234	12063368	-1
WBGene00000534	9972.3	0.0171231	0.0771965	0.221811	0.824461	0.999992	cpi-2	V	6044028	6045671	1
WBGene00000535	6103.43	-0.0369306	0.123827	-0.298244	0.765517	0.999992	cpi-1	IV	6092603	6093680	-1
WBGene00000536	2872.28	-0.0236333	0.0783558	-0.301615	0.762945	0.999992	clk-1	III	5277894	5279344	1
WBGene00000537	6299.81	-0.0145386	0.117003	-0.124259	0.90111	0.999992	clk-2	III	7515223	7518524	-1
WBGene00000539	843.471	0.103991	0.229528	0.453066	0.650501	0.999992	cln-3.1	V	11263523	11265711	-1
WBGene00000540	1654.5	0.100469	0.190357	0.52779	0.597645	0.999992	cln-3.2	I	5274693	5278708	-1
WBGene00000541	366.546	0.196339	0.224533	0.874433	0.381883	0.999992	cln-3.3	V	8682955	8686160	1
WBGene00000542	21710.3	0.00617515	0.0609296	0.101349	0.919273	0.999992	clp-1	III	7980913	7986327	1
WBGene00000543	6121.5	0.0446421	0.156144	0.285902	0.774953	0.999992	clp-2	III	4700325	4704054	-1
WBGene00000544	636.185	0.0972813	0.322585	0.301568	0.762982	0.999992	clp-3	I	12073143	12084221	-1
WBGene00000545	3317.64	0.0186665	0.125731	0.148463	0.881977	0.999992	clp-4	III	1807740	1818323	-1
WBGene00000546	414.573	-0.0783291	0.398406	-0.196606	0.844136	0.999992	clp-6	IV	1431272	1435039	-1
WBGene00000547	11858.2	0.00724251	0.067854	0.106737	0.914998	0.999992	clp-7	IV	1435465	1446182	-1
WBGene00000548	15825.4	0.0471918	0.128379	0.367598	0.713173	0.999992	clr-1	II	5466363	5473812	1
WBGene00000549	11530	-0.0894585	0.106737	-0.838122	0.401962	0.999992	cls-2	III	9055052	9058882	1
WBGene00000550	44172.9	-0.0472821	0.0851558	-0.555241	0.57873	0.999992	clu-1	III	9516631	9521460	-1
WBGene00000552	32620.9	0.00751782	0.0741057	0.101447	0.919195	0.999992	cmd-1	V	1156271	1158174	1
WBGene00000553	337.362	0.00519208	0.134762	0.0385277	0.969267	0.999992	cmk-1	IV	1824481	1834029	1
WBGene00000554	2907.89	-0.0101714	0.067646	-0.150362	0.880479	0.999992	cnb-1	V	11375742	11377990	1
WBGene00000556	497.5	-0.0571748	0.195327	-0.292714	0.769741	0.999992	cnc-2	V	1449665	1450189	-1
WBGene00000557	684.213	-0.0566224	0.130223	-0.434812	0.663699	0.999992	cnc-3	V	1448004	1448790	1
WBGene00000558	115.968	0.837446	0.562444	1.48894	0.136503	0.999992	cnc-4	V	1447195	1447707	1
WBGene00000561	128.548	0.008445	0.435168	0.0194063	0.984517	0.999992	cnd-1	III	5240593	5242108	-1
WBGene00000562	398.535	-0.070836	0.284688	-0.248819	0.8035	0.999992	cng-1	V	15025740	15031473	-1
WBGene00000563	11.097	0.102585	0.765372	0.134032	0.893377	0.999992	cng-3	IV	9477522	9481037	-1
WBGene00000564	9915.53	-0.00715314	0.0632025	-0.113178	0.909889	0.999992	cnk-1	III	10271257	10278579	1
WBGene00000565	6649.34	0.0230674	0.0604672	0.381486	0.702843	0.999992	cnt-1	II	12072082	12088868	-1
WBGene00000566	10451.8	-0.0275046	0.0925952	-0.297042	0.766435	0.999992	cnt-2	III	10655018	10677521	1
WBGene00000567	22088.2	-0.00983604	0.224391	-0.0438344	0.965036	0.999992	cnx-1	III	9814364	9817137	-1
WBGene00000583	146.197	-0.133515	0.301904	-0.442245	0.658312	0.999992	cof-2	I	6250475	6252834	1
WBGene00000584	112.739	0.0699645	0.328572	0.212935	0.831377	0.999992	cog-1	II	14902493	14907533	1
WBGene00000585	9759.83	0.0502028	0.144348	0.34779	0.727998	0.999992	cogc-2	IV	7036960	7039580	-1
WBGene00000591	3409.74	0.051751	0.10179	0.508412	0.611165	0.999992	coh-1	X	7465193	7475014	-1
WBGene00000592	5766.92	-0.058158	0.0882768	-0.658813	0.510016	0.999992	coh-3	V	14457475	14460136	1
WBGene00000593	23.0564	0.653562	1.22336	0.534236	0.593178	0.999992	col-2	IV	10084454	10085438	-1
WBGene00000594	2506.11	0.0325002	0.845011	0.0384613	0.96932	0.999992	col-3	IV	8824783	8826013	1
WBGene00000596	951.734	0.0160348	0.879019	0.0182417	0.985446	0.999992	col-7	I	7401674	7402753	1
WBGene00000597	148067	-0.0261157	0.170563	-0.153115	0.878308	0.999992	col-8	III	7019583	7020600	-1
WBGene00000598	2.64218	4.83446	3.92333	1.23223	0.217862	0.999992	col-9	X	13590035	13591207	1
WBGene00000599	2428.05	-0.0180332	0.527473	-0.0341879	0.972727	0.999992	col-10	V	9164297	9165307	-1
WBGene00000601	1967	-0.00126245	0.83716	-0.00150801	0.998797	0.999992	col-12	V	10423907	10425092	-1
WBGene00000602	1840.54	-0.00324158	0.774599	-0.00418485	0.996661	0.999992	col-13	V	10420890	10421892	-1
WBGene00000603	625.179	0.0735783	0.819281	0.0898084	0.928439	0.999992	col-14	IV	7753408	7754651	1
WBGene00000606	348.066	0.0383178	0.640593	0.0598161	0.952302	0.999992	col-17	II	4866436	4867576	-1
WBGene00000608	163168	0.00585084	0.221992	0.0263561	0.978973	0.999992	col-19	X	421707	423033	1
WBGene00000609	266461	-0.0240726	0.188769	-0.127524	0.898526	0.999992	col-20	II	4869607	4870791	-1
WBGene00000610	18.4157	0.179136	0.891803	0.200869	0.840801	0.999992	col-33	IV	4263293	4265202	1
WBGene00000611	727.836	-0.043091	0.257895	-0.167088	0.867301	0.999992	col-34	IV	4243548	4244610	-1
WBGene00000612	20.4053	0.0411149	0.668412	0.0615114	0.950952	0.999992	col-35	I	7385907	7386935	-1
WBGene00000615	1082.13	0.0692161	0.872182	0.0793596	0.936747	0.999992	col-38	II	8568035	8569089	-1
WBGene00000616	1503.64	0.0128503	0.828027	0.0155192	0.987618	0.999992	col-39	II	10704902	10706019	1
WBGene00000617	15.1864	0.21641	0.827205	0.261616	0.793617	0.999992	col-40	II	1104945	1106925	-1
WBGene00000618	76.4002	-0.17252	0.494257	-0.349048	0.727053	0.999992	col-41	X	15175035	15176481	-1
WBGene00000620	243.1	0.073124	0.182984	0.39962	0.689437	0.999992	col-43	V	8049744	8050893	-1
WBGene00000621	3.37399	-0.427033	2.82442	-0.151193	0.879823	0.999992	col-44	X	13591498	13592461	1
WBGene00000622	81.4386	0.0899782	0.371765	0.24203	0.808757	0.999992	col-45	I	115739	117438	1
WBGene00000623	12.1362	0.0896498	0.690011	0.129925	0.896626	0.999992	col-46	I	741913	745570	-1
WBGene00000625	342.499	0.0977771	0.507874	0.192522	0.847333	0.999992	col-48	I	3010688	3011648	1
WBGene00000626	371.111	0.0823304	1.09744	0.0750203	0.940199	0.999992	col-49	I	3137185	3138447	1
WBGene00000627	2.99563	-0.00279885	2.16791	-0.00129104	0.99897	0.999992	col-50	I	3651230	3652599	-1
WBGene00000628	3.08594	0.906581	2.80737	0.322929	0.746749	0.999992	col-51	I	3653997	3655265	1
WBGene00000630	146.484	-0.000962318	0.219699	-0.00438016	0.996505	0.999992	col-53	I	5644729	5646370	1
WBGene00000631	20.8993	-0.192814	0.857713	-0.2248	0.822135	0.999992	col-54	I	5842709	5844050	1
WBGene00000633	6.73364	-0.430421	2.67009	-0.161201	0.871935	0.999992	col-56	I	6232777	6234280	1
WBGene00000634	60.3326	0.0188759	0.612194	0.0308332	0.975403	0.999992	col-58	I	6311229	6312413	1
WBGene00000636	390.182	0.048403	1.09548	0.0441843	0.964757	0.999992	col-60	I	7105302	7106926	1
WBGene00000637	9.79108	-0.115577	2.01841	-0.0572612	0.954337	0.999992	col-61	I	7202242	7203533	-1
WBGene00000638	982.854	-0.00096652	0.869557	-0.00111151	0.999113	0.999992	col-62	I	7403291	7404374	-1
WBGene00000639	568.8	0.166045	0.99574	0.166756	0.867562	0.999992	col-63	I	8243695	8244963	-1
WBGene00000640	56.8545	-0.487681	0.460068	-1.06002	0.289136	0.999992	col-64	I	9893698	9895596	-1
WBGene00000641	274.97	0.0685086	0.61585	0.111242	0.911424	0.999992	col-65	I	11489158	11490630	-1
WBGene00000642	4.07233	-0.00228819	2.05745	-0.00111215	0.999113	0.999992	col-66	I	11559446	11560565	1
WBGene00000644	113.701	-0.0664746	0.373732	-0.177867	0.858827	0.999992	col-68	II	104534	105833	1
WBGene00000645	15.0055	0.409525	0.852883	0.480165	0.63111	0.999992	col-69	II	303924	305530	-1
WBGene00000646	33.758	0.139599	0.847343	0.16475	0.869141	0.999992	H17B01.2	II	1470565	1472260	1
WBGene00000647	1191.62	0.057449	0.921588	0.062337	0.950295	0.999992	col-71	II	3500077	3502449	-1
WBGene00000648	4.54101	0.282324	1.1413	0.24737	0.804622	0.999992	col-72	II	3520703	3524180	-1
WBGene00000649	1443.88	0.0876835	1.08554	0.080774	0.935622	0.999992	col-73	II	4872098	4873127	-1
WBGene00000650	372.563	0.132382	0.580207	0.228163	0.819519	0.999992	col-74	II	5830867	5832014	1
WBGene00000652	1637.03	-0.115636	0.124204	-0.931014	0.351846	0.999992	col-76	II	8204341	8207491	1
WBGene00000653	1282.86	0.0503754	0.913235	0.0551614	0.95601	0.999992	col-77	II	8358228	8359381	-1
WBGene00000655	90.4888	-0.209413	0.664016	-0.315374	0.752478	0.999992	col-79	II	10703596	10704572	1
WBGene00000656	118715	0.0091857	0.207508	0.0442667	0.964692	0.999992	col-80	II	10707201	10708286	1
WBGene00000657	12004.2	0.00255092	0.933057	0.00273394	0.997819	0.999992	col-81	II	11012397	11013820	-1
WBGene00000658	50.1862	0.229205	0.492019	0.465846	0.641326	0.999992	col-83	II	11044135	11045968	-1
WBGene00000659	58.6218	-0.0347816	0.373866	-0.0930325	0.925878	0.999992	col-84	II	11868535	11869688	1
WBGene00000660	11.9607	0.105023	1.20303	0.0872985	0.930434	0.999992	col-85	II	12493800	12495106	-1
WBGene00000661	28.9591	-0.342177	0.584734	-0.585183	0.558425	0.999992	col-86	II	13096009	13098275	-1
WBGene00000662	51.541	-0.248359	0.418129	-0.593978	0.552527	0.999992	col-87	II	14090075	14094690	-1
WBGene00000663	557.901	0.0615958	1.15722	0.0532273	0.957551	0.999992	col-88	III	41061	42021	1
WBGene00000664	109.806	-0.00568669	0.656522	-0.00866184	0.993089	0.999992	col-89	III	4748127	4749164	1
WBGene00000665	106.213	-0.216649	0.761863	-0.284367	0.776129	0.999992	col-90	III	7948838	7950068	1
WBGene00000666	263.322	0.0416578	0.797933	0.0522071	0.958364	0.999992	col-91	III	8262355	8263664	-1
WBGene00000667	23224.6	-0.0305979	0.438476	-0.0697824	0.944367	0.999992	col-92	III	10982166	10983253	-1
WBGene00000668	154350	-0.0492009	0.218648	-0.225023	0.821962	0.999992	col-93	III	10984555	10985609	-1
WBGene00000669	28981.2	-0.0361955	0.267451	-0.135335	0.892347	0.999992	col-94	III	10986826	10987873	-1
WBGene00000670	37136.2	-0.0118901	0.104947	-0.113296	0.909796	0.999992	col-95	III	11703885	11705091	1
WBGene00000671	2358.97	-0.0826468	0.208275	-0.396815	0.691504	0.999992	col-96	III	11705713	11706644	-1
WBGene00000672	636.114	0.00612472	0.592221	0.0103419	0.991748	0.999992	col-97	III	12992405	12993707	-1
WBGene00000673	64759.1	-0.0155049	0.269476	-0.0575373	0.954117	0.999992	col-98	III	13018935	13020226	1
WBGene00000674	890.052	0.0400783	0.107034	0.374444	0.708074	0.999992	col-99	IV	138346	147919	-1
WBGene00000675	99628.4	0.00656944	0.81741	0.0080369	0.993588	0.999992	col-101	IV	325437	326711	-1
WBGene00000676	4.27491	-0.00200103	2.14097	-0.000934639	0.999254	0.999992	col-102	IV	604444	605876	1
WBGene00000677	47436.2	0.0411177	0.249029	0.165112	0.868856	0.999992	col-103	IV	762416	763680	-1
WBGene00000678	567.362	0.0649302	0.915423	0.0709292	0.943454	0.999992	col-104	IV	1353636	1355305	-1
WBGene00000679	17.3274	0.285076	1.3469	0.211653	0.832378	0.999992	col-105	IV	1357816	1359225	-1
WBGene00000680	144819	0.00668847	0.226808	0.0294895	0.976474	0.999992	col-106	IV	1459866	1460786	-1
WBGene00000681	634.894	0.0447767	0.527959	0.0848109	0.932412	0.999992	col-107	IV	1548721	1549714	1
WBGene00000683	322.246	0.156331	0.65206	0.23975	0.810524	0.999992	col-109	IV	1817311	1820253	-1
WBGene00000684	81.9565	-0.0107209	0.664755	-0.0161276	0.987133	0.999992	col-110	IV	4608201	4609679	-1
WBGene00000685	1164.04	0.0103924	0.148548	0.0699598	0.944226	0.999992	col-111	IV	4655776	4657783	-1
WBGene00000687	181.444	0.135882	0.460403	0.295137	0.767889	0.999992	col-113	IV	7150663	7152501	-1
WBGene00000688	8.03465	-0.0314537	0.854118	-0.036826	0.970624	0.999992	col-114	IV	7245505	7246640	-1
WBGene00000689	36.7367	0.335875	0.705958	0.475771	0.634237	0.999992	col-115	IV	7988685	7991425	1
WBGene00000690	358.691	-0.0870606	0.150872	-0.577051	0.563905	0.999992	col-116	IV	8356776	8357854	1
WBGene00000691	2548.11	0.0335919	0.844862	0.0397602	0.968284	0.999992	col-117	IV	8822962	8824195	-1
WBGene00000692	2312.83	0.0356435	0.259228	0.137499	0.890637	0.999992	col-118	IV	8848182	8849673	1
WBGene00000693	277777	-0.0356616	0.165656	-0.215275	0.829553	0.999992	col-119	IV	8978823	8979812	-1
WBGene00000694	381.749	0.0504385	1.12077	0.0450034	0.964105	0.999992	col-120	IV	9260610	9261787	-1
WBGene00000695	346.997	-0.0533321	0.36854	-0.144712	0.884938	0.999992	col-121	IV	9394934	9396218	-1
WBGene00000696	275355	-0.00825217	0.205092	-0.0402364	0.967905	0.999992	col-122	IV	9563360	9564441	1
WBGene00000697	48.5698	-0.607405	0.680694	-0.892333	0.372215	0.999992	col-123	IV	9821895	9823112	1
WBGene00000698	229922	0.00405437	0.263964	0.0153596	0.987745	0.999992	col-124	IV	10216450	10217643	1
WBGene00000699	1481.93	0.0399982	0.83765	0.0477506	0.961915	0.999992	col-125	IV	11225505	11226519	1
WBGene00000700	243.345	-0.0665158	0.88283	-0.0753438	0.939941	0.999992	col-126	IV	11263401	11264331	1
WBGene00000701	243.326	-0.0606328	0.892955	-0.0679013	0.945864	0.999992	col-127	IV	11264947	11265877	-1
WBGene00000702	9.34343	-0.0194181	1.21918	-0.0159272	0.987292	0.999992	col-128	IV	11550002	11551987	-1
WBGene00000703	22482.4	0.0603636	0.834663	0.0723209	0.942347	0.999992	col-129	IV	12108672	12110275	-1
WBGene00000704	338.935	0.005217	0.638573	0.00816978	0.993482	0.999992	col-130	IV	12427506	12428522	-1
WBGene00000705	29.7514	-0.25218	0.767733	-0.328473	0.742554	0.999992	col-131	IV	13065766	13067300	-1
WBGene00000706	30.9437	0.223582	0.463309	0.482578	0.629396	0.999992	col-132	IV	13089578	13091067	-1
WBGene00000707	2046.27	-0.0130765	0.999477	-0.0130834	0.989561	0.999992	col-133	IV	14098325	14099368	-1
WBGene00000708	3805.14	-0.0778511	0.548885	-0.141835	0.88721	0.999992	col-135	IV	15129666	15131797	-1
WBGene00000709	3.23011	-0.000843429	3.77687	-0.000223315	0.999822	0.999992	col-136	IV	16551492	16554348	-1
WBGene00000710	185.755	-0.0443564	0.913921	-0.0485342	0.961291	0.999992	col-137	IV	16601480	16602776	-1
WBGene00000711	856.121	0.0981878	1.08744	0.090293	0.928054	0.999992	col-138	IV	17182798	17183740	-1
WBGene00000712	17740.7	-5.28171e-05	0.917596	-5.75603e-05	0.999954	0.999992	col-139	V	4652863	4654007	-1
WBGene00000713	261069	-0.0112151	0.192011	-0.0584088	0.953423	0.999992	col-140	V	5835855	5836871	-1
WBGene00000714	244.634	-0.04256	0.437457	-0.0972896	0.922496	0.999992	col-141	V	6829666	6830721	1
WBGene00000715	26222.3	0.0149887	0.493035	0.0304009	0.975747	0.999992	col-142	V	6831163	6832256	1
WBGene00000716	122332	0.00954118	0.168268	0.0567023	0.954782	0.999992	col-143	V	6835635	6836700	1
WBGene00000717	2700.2	-0.0162168	0.527525	-0.0307413	0.975476	0.999992	col-144	V	9159642	9160642	-1
WBGene00000718	466.96	0.0364723	1.05198	0.0346702	0.972343	0.999992	col-145	V	9162051	9163005	-1
WBGene00000719	694.102	-0.0128803	0.867607	-0.0148458	0.988155	0.999992	col-146	V	9629943	9631012	1
WBGene00000720	1771.9	0.00909462	0.924715	0.00983505	0.992153	0.999992	col-147	V	9632029	9633338	-1
WBGene00000722	1868.05	-0.000153868	0.779767	-0.000197326	0.999843	0.999992	col-149	V	10291697	10292869	-1
WBGene00000723	734.91	-0.0519462	0.349392	-0.148676	0.881809	0.999992	col-150	V	10293563	10294623	-1
WBGene00000724	20.2401	-0.471047	0.623599	-0.755368	0.450028	0.999992	col-151	V	10393531	10395232	-1
WBGene00000725	64.7858	0.889248	0.618173	1.43851	0.15029	0.999992	col-152	V	10560921	10562150	1
WBGene00000726	558.84	-0.0120995	0.133058	-0.0909345	0.927545	0.999992	col-153	V	10949857	10951821	1
WBGene00000727	1078.33	-0.0187903	0.430798	-0.0436175	0.965209	0.999992	col-154	V	11385360	11386529	1
WBGene00000728	4314.54	-0.0545118	0.240618	-0.226549	0.820775	0.999992	col-155	V	11388852	11389876	-1
WBGene00000729	173.675	0.0983744	0.914893	0.107526	0.914372	0.999992	col-156	V	11449223	11450357	-1
WBGene00000730	323.524	0.0913259	0.731955	0.12477	0.900706	0.999992	col-157	V	11484032	11484998	1
WBGene00000731	464.993	0.0664904	0.331178	0.200769	0.840879	0.999992	col-158	V	11829582	11831220	1
WBGene00000732	12641.1	-0.0281588	0.587431	-0.0479356	0.961768	0.999992	col-159	V	13198230	13199315	-1
WBGene00000733	98385.1	-0.0178503	0.21013	-0.084949	0.932302	0.999992	col-160	V	13200982	13202192	-1
WBGene00000734	957.636	0.00671784	1.04568	0.00642438	0.994874	0.999992	col-161	V	13317028	13318011	-1
WBGene00000735	771.485	0.00445695	0.840476	0.00530288	0.995769	0.999992	col-162	V	13441967	13443402	1
WBGene00000736	24.8337	0.415836	0.608936	0.682889	0.494677	0.999992	col-163	V	20600095	20602474	1
WBGene00000738	373.698	0.0143243	0.571615	0.0250594	0.980008	0.999992	col-165	X	4353618	4354820	1
WBGene00000739	4560.48	-0.0578204	0.248051	-0.233099	0.815684	0.999992	col-166	X	6279801	6281015	1
WBGene00000740	1404.75	0.0103025	0.810369	0.0127133	0.989857	0.999992	col-167	X	6323297	6324539	1
WBGene00000741	1007.18	-0.00973581	0.832192	-0.011699	0.990666	0.999992	col-168	X	6326191	6327375	1
WBGene00000742	267.875	-0.00800616	0.713288	-0.0112243	0.991044	0.999992	col-169	X	6329160	6330127	1
WBGene00000743	741.996	-0.0121245	0.554418	-0.0218689	0.982553	0.999992	col-170	X	6331620	6332686	1
WBGene00000744	1.67726	-0.00420952	2.37051	-0.00177579	0.998583	0.999992	col-171	X	6334298	6335221	1
WBGene00000745	39.9352	-0.164995	0.573241	-0.287828	0.773479	0.999992	col-172	X	6672830	6674407	1
WBGene00000746	63.1288	0.131292	0.667259	0.196763	0.844013	0.999992	col-173	X	6875131	6877536	-1
WBGene00000747	38.057	0.0988287	0.834808	0.118385	0.905763	0.999992	col-174	X	7546842	7548365	1
WBGene00000748	454.141	0.106384	1.16498	0.091319	0.927239	0.999992	col-175	X	9233638	9234618	-1
WBGene00000749	252.747	-0.022007	0.748387	-0.029406	0.976541	0.999992	col-176	X	10077597	10078602	1
WBGene00000750	62.7864	0.0943509	0.383352	0.246121	0.805589	0.999992	col-177	X	10999742	11001850	-1
WBGene00000751	200746	-0.0399024	0.192646	-0.207129	0.835909	0.999992	col-178	X	11199455	11200464	1
WBGene00000752	56458.2	0.00142061	0.199475	0.00712175	0.994318	0.999992	col-179	X	11201465	11202488	1
WBGene00000753	651.149	0.0288445	1.02648	0.0281003	0.977582	0.999992	col-180	X	11711307	11712280	-1
WBGene00000754	285254	-0.00950704	0.206526	-0.0460332	0.963284	0.999992	col-181	X	12104930	12106081	1
WBGene00000755	33.808	0.270975	0.778232	0.348193	0.727695	0.999992	col-182	X	12636153	12637056	-1
WBGene00000757	157548	-0.044593	0.19603	-0.227481	0.82005	0.999992	col-184	X	13469387	13470471	1
WBGene00000759	124.793	-0.0402047	0.479559	-0.0838368	0.933186	0.999992	col-186	X	15951503	15954570	1
WBGene00000760	14.4027	-0.362018	0.759868	-0.476421	0.633774	0.999992	col-187	X	16072903	16074852	1
WBGene00000761	5172.63	-0.0644622	0.0990797	-0.65061	0.515298	0.999992	coq-1	I	5412841	5415629	-1
WBGene00000762	3533.05	0.0165604	0.0555431	0.298153	0.765586	0.999992	coq-2	III	6935967	6939443	1
WBGene00000763	2330.82	-0.0441193	0.131616	-0.335213	0.737464	0.999992	coq-3	IV	14793119	14796375	-1
WBGene00000764	1604.59	-0.0509543	0.085204	-0.598027	0.549822	0.999992	coq-4	I	3869214	3870114	1
WBGene00000765	7672.25	-0.0346257	0.069526	-0.498026	0.618466	0.999992	coq-5	III	7857315	7858457	-1
WBGene00000766	4026.21	-0.00731543	0.0858233	-0.0852383	0.932072	0.999992	coq-6	V	9336762	9338858	1
WBGene00000767	15477.6	-0.0184149	0.0629978	-0.292311	0.770049	0.999992	coq-8	III	4863427	4866949	1
WBGene00000768	1940.18	-0.0172731	0.158741	-0.108813	0.913351	0.999992	cor-1	III	10249111	10254709	1
WBGene00000770	6056.88	-0.0142498	0.0968408	-0.147147	0.883016	0.999992	cpb-1	III	9322316	9324733	1
WBGene00000771	276.743	0.00828408	0.576784	0.0143625	0.988541	0.999992	cpb-2	II	6192784	6195170	1
WBGene00000772	24032.3	-0.0201473	0.0519275	-0.38799	0.698023	0.999992	cpb-3	I	5788634	5791752	-1
WBGene00000773	10025.4	-0.0905382	0.0886875	-1.02087	0.307317	0.999992	cpf-1	II	8600435	8602479	-1
WBGene00000774	7710.25	-0.0448652	0.0622087	-0.721205	0.470783	0.999992	cpf-2	III	13266874	13268897	-1
WBGene00000775	730.19	0.143334	0.171196	0.837252	0.402451	0.999992	cpin-1	IV	9451338	9453372	1
WBGene00000776	206149	0.0238483	0.0498758	0.478154	0.63254	0.999992	cpl-1	V	16592572	16595346	-1
WBGene00000777	27245.9	-0.0305786	0.0812813	-0.376207	0.706763	0.999992	cpn-1	I	8636123	8637971	-1
WBGene00000778	345.71	-0.0264141	0.208311	-0.126801	0.899098	0.999992	cpn-2	II	337339	339248	1
WBGene00000779	39275.4	-0.0445751	0.154313	-0.288861	0.772688	0.999992	cpn-3	I	3987842	3988699	1
WBGene00000780	4498.46	0.0177402	0.133001	0.133384	0.89389	0.999992	cpn-4	I	10924240	10925753	-1
WBGene00000781	66660.1	-0.0219622	0.14158	-0.155122	0.876725	0.999992	cpr-1	V	11975515	11976756	1
WBGene00000782	22.0458	0.394616	0.649678	0.607403	0.543583	0.999992	cpr-2	V	16533004	16534110	-1
WBGene00000783	697.343	0.00559932	0.292196	0.0191629	0.984711	0.999992	cpr-3	V	15296853	15298700	-1
WBGene00000784	52320.7	-0.00615586	0.194684	-0.0316197	0.974775	0.999992	cpr-4	V	6614674	6615845	1
WBGene00000785	44389.1	-0.0410011	0.105452	-0.388814	0.697414	0.999992	cpr-5	V	1132598	1134036	-1
WBGene00000786	140475	-0.0594684	0.102658	-0.579286	0.562397	0.999992	cpr-6	X	6607203	6609045	1
WBGene00000787	5995.39	-0.0181823	0.0467267	-0.389121	0.697187	0.999992	cps-6	I	4446577	4448461	-1
WBGene00000788	55302.3	-0.046688	0.164648	-0.283563	0.776745	0.999992	cpz-1	I	2686639	2689493	-1
WBGene00000789	5900.81	-0.0199156	0.101313	-0.196576	0.844159	0.999992	cpz-2	V	13381189	13383077	1
WBGene00000792	1745.88	-0.0349594	0.0999863	-0.349642	0.726608	0.999992	crb-1	X	17402540	17414014	-1
WBGene00000793	3058.47	0.0259599	0.110602	0.234714	0.814431	0.999992	crh-1	III	11657738	11693837	1
WBGene00000794	18219.3	-0.0518102	0.067742	-0.764817	0.444381	0.999992	crn-1	I	3481987	3484499	1
WBGene00000795	1689.21	-0.0453877	0.0856375	-0.529998	0.596113	0.999992	crn-2	V	5594615	5595842	1
WBGene00000796	19189.9	-0.020426	0.074839	-0.272932	0.784906	0.999992	crn-3	II	10588042	10592652	1
WBGene00000797	1461.85	-0.0402371	0.104644	-0.384514	0.700598	0.999992	crn-4	X	2255852	2258101	-1
WBGene00000798	2624.06	0.0207811	0.0623204	0.333455	0.738791	0.999992	crn-5	II	10592752	10593591	1
WBGene00000799	1450.29	0.0820848	0.0983212	0.834863	0.403795	0.999992	crn-6	III	9367238	9370385	1
WBGene00000800	27181.8	-0.0309902	0.0594572	-0.521218	0.602215	0.999992	cars-1	I	2623102	2628577	-1
WBGene00000801	1326.01	-0.0755749	0.132528	-0.570256	0.568504	0.999992	cars-2	I	2629685	2632320	1
WBGene00000802	125281	-0.0156757	0.0471791	-0.332258	0.739694	0.999992	crt-1	V	6098993	6100553	-1
WBGene00000803	3532.97	-0.0608474	0.0748942	-0.812445	0.416536	0.999992	csb-1	X	15861294	15865918	-1
WBGene00000804	7242.62	0.0118601	0.112065	0.105833	0.915715	0.999992	csc-1	II	13596955	13598068	1
WBGene00000812	10134.2	-0.0116182	0.0521173	-0.222924	0.823595	0.999992	csk-1	I	71425	81071	1
WBGene00000813	9108.5	-0.00731889	0.105533	-0.0693517	0.94471	0.999992	csn-1	V	17861368	17870651	-1
WBGene00000814	10945.5	0.118823	0.197132	0.602757	0.54667	0.999992	csn-2	I	6022660	6026874	1
WBGene00000815	10582	-0.00926477	0.0678053	-0.136638	0.891317	0.999992	csn-3	IV	194745	202586	1
WBGene00000816	8962.08	-0.00224811	0.0609757	-0.036869	0.970589	0.999992	csn-4	IV	1077463	1087013	-1
WBGene00000817	11686	-0.0113521	0.0521729	-0.217586	0.827751	0.999992	csn-5	IV	5649533	5651079	1
WBGene00000818	9246.23	-0.0343817	0.0565544	-0.60794	0.543227	0.999992	csn-6	IV	13300828	13304145	1
WBGene00000819	215.271	-0.206664	0.236049	-0.875513	0.381295	0.999992	csp-1	II	13601204	13605057	1
WBGene00000820	105.368	0.139613	0.519225	0.268887	0.788017	0.999992	csp-2	IV	6307739	6315719	1
WBGene00000821	34.6892	0.487947	0.605777	0.805489	0.420537	0.999992	csp-3	I	11888501	11890558	-1
WBGene00000822	22787.7	-0.000313885	0.133274	-0.00235519	0.998121	0.999992	csq-1	X	14684877	14688322	1
WBGene00000829	47933.8	0.257685	0.188058	1.37024	0.170612	0.999992	ctb-1	MtDNA	4504	5621	1
WBGene00000830	4016.92	-0.0115912	0.0881461	-0.131499	0.89538	0.999992	ctl-1	II	14303612	14306329	-1
WBGene00000831	8993.39	-0.0558951	0.144581	-0.386601	0.699052	0.999992	ctl-2	II	14299553	14302083	-1
WBGene00000832	2658.8	0.0185891	0.0753813	0.246601	0.805217	0.999992	ctn-1	I	2606754	2617360	1
WBGene00000833	96285.8	-0.00238217	0.0751569	-0.031696	0.974715	0.999992	cts-1	III	10214814	10216635	-1
WBGene00000834	15240.3	0.0503449	0.0760971	0.661588	0.508235	0.999992	cua-1	III	13439730	13455307	-1
WBGene00000835	3012.63	0.024295	0.103958	0.2337	0.815218	0.999992	cuc-1	III	7860466	7861004	-1
WBGene00000836	19715.6	-0.0377163	0.0471353	-0.800171	0.423611	0.999992	cul-1	III	10471237	10475245	1
WBGene00000837	26268.5	-0.0143478	0.0616929	-0.232568	0.816097	0.999992	cul-2	III	13687269	13692683	1
WBGene00000838	27289.9	-0.140167	0.110083	-1.27328	0.20292	0.999992	cul-3	V	177421	184966	1
WBGene00000839	10061.3	0.0449545	0.142271	0.315978	0.752019	0.999992	cul-4	II	7302101	7305760	1
WBGene00000840	11474.6	0.0183001	0.111697	0.163837	0.86986	0.999992	cul-5	V	10179535	10183154	1
WBGene00000841	468.234	-0.0263981	0.216511	-0.121925	0.902958	0.999992	cul-6	IV	12586511	12590428	-1
WBGene00000843	12705	-0.00746927	0.0453164	-0.164825	0.869082	0.999992	cup-2	I	10398944	10400195	-1
WBGene00000845	498.489	0.0681304	0.236138	0.28852	0.772949	0.999992	cup-4	III	7866509	7868732	1
WBGene00000846	8961.7	0.0563078	0.126209	0.446147	0.655491	0.999992	cup-5	III	7584181	7591570	1
WBGene00000851	10.544	0.200204	1.94924	0.102709	0.918194	0.999992	cut-1	II	11269124	11271599	1
WBGene00000853	117.965	-0.0232591	0.392777	-0.0592172	0.952779	0.999992	cut-6	III	10911460	10916567	1
WBGene00000854	6642.63	-0.0493386	0.0680551	-0.72498	0.468464	0.999992	cux-7	III	7518628	7520845	-1
WBGene00000857	790.403	-0.025143	0.125216	-0.200797	0.840857	0.999992	cwn-1	II	130983	133598	-1
WBGene00000858	375.17	0.111352	0.244291	0.455819	0.64852	0.999992	cwn-2	IV	10067824	10070251	1
WBGene00000860	1.98242	-4.44846	3.92929	-1.13213	0.25758	0.999992	cwp-2	V	4841940	4842567	-1
WBGene00000862	33.8954	-0.103082	0.457211	-0.225459	0.821623	0.999992	cwp-4	V	5053619	5056473	1
WBGene00000863	12448.6	-0.000513551	0.0651898	-0.00787778	0.993715	0.999992	cya-1	III	9106702	9109272	-1
WBGene00000864	682.075	-0.0658177	0.169004	-0.389444	0.696948	0.999992	cya-2	II	2022673	2023614	-1
WBGene00000865	36872	-0.0384576	0.0700382	-0.549095	0.58294	0.999992	cyb-1	IV	10735259	10737177	1
WBGene00000866	20570.8	-0.0392625	0.0489569	-0.80198	0.422564	0.999992	cyb-2.1	IV	10985985	10987426	1
WBGene00000867	31696.7	-0.0193516	0.0545	-0.355076	0.722533	0.999992	cyb-2.2	I	4114734	4116370	1
WBGene00000868	94591.8	-0.0148715	0.0426239	-0.348901	0.727163	0.999992	cyb-3	V	15395696	15397348	1
WBGene00000869	38288	0.00785171	0.0845125	0.092906	0.925978	0.999992	cyc-1	I	8022674	8024422	-1
WBGene00000870	1588.23	-0.0217856	0.0704761	-0.30912	0.75723	0.999992	cyd-1	II	12980591	12993118	1
WBGene00000871	15165.8	0.0181747	0.140145	0.129685	0.896815	0.999992	cye-1	I	6780806	6784396	1
WBGene00000872	9936.44	-0.0427892	0.0573424	-0.746206	0.455543	0.999992	cyk-1	III	7023642	7029203	-1
WBGene00000874	13666.4	0.0103876	0.0445072	0.233392	0.815457	0.999992	cyk-3	III	6020165	6024659	1
WBGene00000875	27047.2	-0.0409358	0.0683949	-0.598521	0.549492	0.999992	cyk-4	III	13768541	13771242	-1
WBGene00000876	11354.2	0.017188	0.0437622	0.392759	0.694498	0.999992	cyl-1	V	11991011	11993767	-1
WBGene00000877	14785.9	-0.0293867	0.0939271	-0.312867	0.754381	0.999992	cyn-1	V	14356076	14356823	1
WBGene00000878	1206.94	0.00496005	0.683878	0.00725282	0.994213	0.999992	cyn-2	III	13692668	13693811	1
WBGene00000879	35054.8	-0.0414291	0.0943564	-0.43907	0.660611	0.999992	cyn-3	V	15189927	15190926	1
WBGene00000880	7713.46	-0.000756743	0.0887184	-0.00852972	0.993194	0.999992	cyn-4	II	10870779	10872611	-1
WBGene00000881	35593.5	-0.023459	0.108647	-0.21592	0.82905	0.999992	cyn-5	I	15040427	15041274	-1
WBGene00000882	2732.26	-0.121294	0.153871	-0.788283	0.430531	0.999992	cyn-6	III	773403	774159	1
WBGene00000883	158724	-0.0493226	0.0909366	-0.542384	0.587554	0.999992	cyn-7	V	15186582	15187787	-1
WBGene00000884	2246.97	-0.0841333	0.0898052	-0.936842	0.34884	0.999992	cyn-8	X	8911293	8914261	1
WBGene00000885	4796.04	-0.0384887	0.0564251	-0.68212	0.495163	0.999992	cyn-9	III	3697821	3699640	-1
WBGene00000886	4110.48	-0.0281847	0.0626406	-0.449943	0.652752	0.999992	cyn-10	II	6912543	6913365	-1
WBGene00000887	3585.81	-0.0455296	0.0845805	-0.538299	0.590371	0.999992	cyn-11	II	8715132	8716281	-1
WBGene00000888	4620.59	-0.0314294	0.0545832	-0.575806	0.564746	0.999992	cyn-12	IV	7132132	7133217	-1
WBGene00000889	8641.19	-0.170355	0.17069	-0.998036	0.318262	0.999992	cyn-13	IV	17111082	17116666	-1
WBGene00000890	5489.91	0.141776	0.134389	1.05497	0.29144	0.999992	sig-7	I	8646451	8651777	1
WBGene00000891	9148.35	-0.032779	0.0484446	-0.676629	0.498641	0.999992	cyn-15	I	13566258	13572063	-1
WBGene00000892	4899.6	-0.000824386	0.0708211	-0.0116404	0.990713	0.999992	cyn-16	II	12028763	12036742	-1
WBGene00000893	119.352	-0.0871244	0.551784	-0.157896	0.874539	0.999992	cyn-17	V	5799673	5805666	1
WBGene00000894	38565.1	-0.0186091	0.0653688	-0.284679	0.77589	0.999992	dab-1	II	8226132	8229122	1
WBGene00000895	178.411	0.0285055	0.221237	0.128846	0.897479	0.999992	dac-1	III	816145	821730	1
WBGene00000896	12217.1	0.0118864	0.0699902	0.16983	0.865144	0.999992	dad-1	I	6553481	6554290	-1
WBGene00000897	4181.41	-0.00404302	0.100052	-0.040409	0.967767	0.999992	daf-1	IV	132416	138076	1
WBGene00000898	13594.7	-0.0360791	0.052028	-0.693455	0.488024	0.999992	daf-2	III	2995487	3040860	-1
WBGene00000899	2719.34	0.056908	0.1024	0.555742	0.578387	0.999992	daf-3	X	817927	825475	-1
WBGene00000900	5034.95	-0.0524112	0.0916472	-0.571881	0.567403	0.999992	daf-4	III	5625014	5632322	1
WBGene00000901	4325.71	0.0713778	0.0797378	0.895156	0.370704	0.999992	daf-5	II	14033233	14037721	-1
WBGene00000902	70.2627	-0.218791	0.584664	-0.374216	0.708243	0.999992	daf-6	X	14888488	14894297	1
WBGene00000903	352.549	-0.0135177	0.154244	-0.0876386	0.930164	0.999992	daf-7	III	811828	813773	1
WBGene00000904	1335.89	-0.0426016	0.111748	-0.381231	0.703032	0.999992	daf-8	I	8584081	8587505	-1
WBGene00000905	124.739	0.0569878	0.282742	0.201554	0.840265	0.999992	daf-9	X	6196927	6200818	1
WBGene00000906	96.8938	0.176	0.541525	0.325007	0.745176	0.999992	daf-10	IV	9136933	9146210	-1
WBGene00000907	43.3078	0.122561	0.399767	0.306581	0.759163	0.999992	daf-11	V	11718089	11725652	-1
WBGene00000908	2281.41	0.179584	0.163353	1.09936	0.271609	0.999992	daf-12	X	10644409	10666874	1
WBGene00000910	829.372	0.0892441	0.149556	0.596725	0.550691	0.999992	daf-14	IV	10250646	10255844	1
WBGene00000911	21031.6	0.0077538	0.0868429	0.0892854	0.928855	0.999992	daf-15	IV	9386208	9394930	1
WBGene00000912	17755.8	0.0356691	0.0467257	0.763371	0.445242	0.999992	daf-16	I	10750343	10776700	1
WBGene00000913	67100.5	-0.0221617	0.0656425	-0.337613	0.735655	0.999992	daf-18	IV	419938	425181	-1
WBGene00000914	3155.62	0.0181588	0.119354	0.152143	0.879074	0.999992	daf-19	II	10157537	10169346	-1
WBGene00000915	402897	-0.0458191	0.0563503	-0.813112	0.416154	0.999992	hsp-90	V	14684918	14688543	1
WBGene00000917	3368.97	-0.0433111	0.0868074	-0.498934	0.617826	0.999992	daf-25	I	332611	337839	1
WBGene00000920	394.371	0.00110154	0.264568	0.00416354	0.996678	0.999992	daf-28	V	19815133	19816451	1
WBGene00000923	5970.87	0.00565057	0.0638965	0.0884331	0.929532	0.999992	daf-31	IV	8290273	8291496	1
WBGene00000928	1641.24	0.0308207	0.135694	0.227134	0.82032	0.999992	dao-2	II	4562853	4563546	1
WBGene00000929	4395.54	-0.0258916	0.141706	-0.182714	0.855023	0.999992	dao-3	X	8084210	8086550	-1
WBGene00000930	44.7647	0.302494	0.604447	0.500447	0.61676	0.999992	dao-4	X	10075288	10076357	1
WBGene00000931	38822.9	-0.0175863	0.0805803	-0.218245	0.827238	0.999992	dao-5	I	10187515	10190896	-1
WBGene00000932	5.67134	-0.555411	2.03855	-0.272453	0.785274	0.999992	dao-6	III	9735265	9736057	-1
WBGene00000933	7714.31	-0.0346049	0.0600069	-0.576682	0.564154	0.999992	dap-3	II	10581133	10582519	1
WBGene00000934	151.084	0.0749327	0.387596	0.193327	0.846703	0.999992	dat-1	III	9242914	9246802	1
WBGene00000935	35364	-0.0232497	0.0751226	-0.30949	0.756949	0.999992	daz-1	II	5456305	5458609	1
WBGene00000936	464.068	-0.0338883	0.152271	-0.222553	0.823883	0.999992	dbl-1	V	6758135	6760418	1
WBGene00000937	7335.76	-0.0483896	0.0802119	-0.603272	0.546328	0.999992	dbr-1	I	6490716	6492727	-1
WBGene00000938	13984	0.0301326	0.10338	0.291473	0.770689	0.999992	dcp-66	I	7536204	7542157	-1
WBGene00000939	20907.8	0.0117643	0.101497	0.115908	0.907726	0.999992	dcr-1	III	8071916	8080281	-1
WBGene00000940	5500.67	-0.00558828	0.0783165	-0.071355	0.943115	0.999992	dcs-1	V	20087848	20090743	-1
WBGene00000941	4704.65	-0.0312017	0.131597	-0.2371	0.812579	0.999992	ddp-1	III	1859888	1860381	1
WBGene00000942	12347.5	0.0319672	0.119051	0.268516	0.788302	0.999992	deb-1	IV	7085216	7094364	-1
WBGene00000950	339.044	0.0213964	0.151338	0.141382	0.887568	0.999992	deg-1	X	7763187	7774915	1
WBGene00000951	233.325	0.120729	0.199253	0.605906	0.544577	0.999992	deg-3	V	11412870	11415159	-1
WBGene00000952	82.3599	0.0356387	0.316141	0.112731	0.910244	0.999992	del-1	X	14268081	14277040	1
WBGene00000953	81.1566	0.111648	0.387057	0.288455	0.772999	0.999992	del-2	IV	9636980	9642003	-1
WBGene00000955	280.509	0.0262583	0.202196	0.129865	0.896673	0.999992	des-2	V	11415342	11420293	-1
WBGene00000958	770.889	-0.0504303	0.165798	-0.304166	0.761001	0.999992	dgk-1	X	984581	991456	-1
WBGene00000959	2625.7	-0.0256059	0.0946102	-0.270646	0.786663	0.999992	dgk-2	X	4494914	4504388	-1
WBGene00000960	37.5978	-0.30171	0.48701	-0.619516	0.535576	0.999992	dgk-3	III	9163077	9168027	1
WBGene00000961	3777.04	0.087167	0.083902	1.03891	0.298845	0.999992	dgn-1	X	10920533	10928998	-1
WBGene00000962	69204.6	-0.0144894	0.040479	-0.357949	0.720382	0.999992	dhc-1	I	4386785	4401980	1
WBGene00000963	1767.74	0.0350358	0.0803037	0.436291	0.662626	0.999992	dhp-1	I	7238994	7243967	-1
WBGene00000964	987.446	-0.0273047	0.117363	-0.232652	0.816031	0.999992	dhp-2	IV	9978122	9980770	1
WBGene00000965	7363.21	0.00968153	0.0802631	0.120622	0.90399	0.999992	dhs-1	I	5278803	5281526	-1
WBGene00000966	741.597	-0.0871052	0.316081	-0.275579	0.782872	0.999992	dhs-2	I	5354160	5357026	1
WBGene00000967	5608.04	-0.056525	0.149971	-0.376905	0.706244	0.999992	dhs-3	I	8212362	8218361	-1
WBGene00000968	480.995	0.144734	0.257909	0.561181	0.574674	0.999992	dhs-4	I	9647603	9649238	-1
WBGene00000969	830.33	-0.0840012	0.10923	-0.769028	0.441877	0.999992	dhs-5	II	5453847	5455977	1
WBGene00000970	12539.4	-0.0222189	0.0687279	-0.323287	0.746478	0.999992	dhs-6	II	5617122	5619319	-1
WBGene00000971	476.804	0.0294656	0.170772	0.172543	0.86301	0.999992	dhs-7	II	7206990	7208460	-1
WBGene00000972	105.722	0.214578	0.28419	0.75505	0.450219	0.999992	dhs-8	II	14498026	14499755	1
WBGene00000973	2871.47	-0.100435	0.116362	-0.863121	0.388071	0.999992	dhs-9	III	5364512	5368045	-1
WBGene00000974	2948.03	-0.0861338	0.133679	-0.644333	0.519359	0.999992	dhs-11	III	10640828	10642872	-1
WBGene00000975	6465.62	-0.034853	0.0599457	-0.58141	0.560964	0.999992	dhs-12	IV	10145249	10146222	1
WBGene00000976	9999.73	0.00922148	0.0668951	0.13785	0.890359	0.999992	dhs-13	V	1765311	1771734	-1
WBGene00000977	2143.83	-0.0711384	0.137068	-0.519001	0.60376	0.999992	dhs-14	V	2763981	2765274	-1
WBGene00000978	120.542	-0.131451	0.25241	-0.520786	0.602516	0.999992	dhs-15	V	2768419	2769854	-1
WBGene00000979	63.2849	-0.134584	0.528277	-0.254761	0.798908	0.999992	dhs-16	V	5983745	5985473	1
WBGene00000980	1743.95	-0.00630481	0.133712	-0.0471523	0.962392	0.999992	dhs-17	V	6026330	6034923	-1
WBGene00000981	2046.22	-0.0454856	0.156119	-0.291353	0.770781	0.999992	dhs-18	V	11045696	11046899	-1
WBGene00000982	3027.1	-0.0517841	0.0785668	-0.659109	0.509826	0.999992	dhs-19	V	11489050	11490328	-1
WBGene00000983	1099.39	-0.0420007	0.332173	-0.126442	0.899382	0.999992	dhs-20	V	11602294	11604563	-1
WBGene00000984	1776.04	0.0625665	0.165593	0.377833	0.705555	0.999992	dhs-21	V	12731772	12733645	-1
WBGene00000985	12285.2	-0.00299086	0.0596198	-0.0501655	0.959991	0.999992	dhs-22	V	14420071	14421450	-1
WBGene00000986	253.509	-0.126683	0.457482	-0.276913	0.781847	0.999992	dhs-23	V	15381097	15382305	1
WBGene00000987	7129.04	-0.142802	0.168502	-0.847483	0.396726	0.999992	dhs-24	V	19934795	19946629	-1
WBGene00000988	16493.1	-0.0652177	0.233334	-0.279504	0.779858	0.999992	dhs-25	X	1486473	1489326	1
WBGene00000989	2423.53	-0.179596	1.13314	-0.158494	0.874067	0.999992	dhs-26	X	3360722	3362493	-1
WBGene00000990	1054	-0.0558953	0.102025	-0.547856	0.583791	0.999992	dhs-27	X	3412876	3414708	-1
WBGene00000991	17258.1	-0.038168	0.138794	-0.274997	0.783319	0.999992	dhs-28	X	6818438	6820080	1
WBGene00000992	624.638	0.0626892	0.184891	0.33906	0.734564	0.999992	dhs-29	X	7661891	7664919	-1
WBGene00000993	3094.11	-0.0024509	0.127784	-0.0191801	0.984697	0.999992	dhs-30	X	17230719	17235838	-1
WBGene00000994	7123.05	0.0453875	0.108297	0.419103	0.675141	0.999992	dic-1	IV	8692086	8696553	1
WBGene00000995	7585.2	0.114125	0.112343	1.01586	0.309698	0.999992	die-1	II	10061287	10074443	-1
WBGene00000996	13512.9	-0.00104802	0.0863055	-0.0121432	0.990311	0.999992	dif-1	IV	7551550	7553008	-1
WBGene00000998	9563.48	0.0161175	0.118081	0.136495	0.89143	0.999992	dig-1	III	6746308	6794764	1
WBGene00001000	35897.7	0.0159221	0.149907	0.106213	0.915414	0.999992	dim-1	X	8050476	8058220	-1
WBGene00001001	14940.1	-0.0874029	0.0772804	-1.13098	0.258062	0.999992	dis-3	IV	10097196	10106556	1
WBGene00001002	10603.6	-0.0371687	0.0676797	-0.549185	0.582878	0.999992	div-1	III	10245056	10248905	-1
WBGene00001005	31091.5	0.0403054	0.0506272	0.796121	0.425962	0.999992	dlc-1	III	6462907	6463801	-1
WBGene00001006	6044.95	0.00779795	0.0712298	0.109476	0.912825	0.999992	dlg-1	X	5479700	5484941	1
WBGene00001007	9903.15	-0.00121337	0.101667	-0.0119348	0.990478	0.999992	dli-1	IV	13096958	13098836	-1
WBGene00001008	4691.54	-0.00394101	0.102892	-0.0383025	0.969447	0.999992	dlk-1	I	12565804	12572801	-1
WBGene00001016	11684	-0.0180324	0.0666294	-0.270637	0.78667	0.999992	dna-2	II	11778435	11782231	1
WBGene00001017	18640.7	0.00295404	0.0670594	0.0440511	0.964864	0.999992	dnc-1	IV	10926730	10933203	-1
WBGene00001018	7919.64	0.00365088	0.0559974	0.0651973	0.948017	0.999992	dnc-2	III	5924394	5925754	-1
WBGene00001019	8112.91	0.0302957	0.103638	0.292321	0.770041	0.999992	dnj-1	IV	11299008	11304789	1
WBGene00001020	5817.88	0.0170987	0.139692	0.122403	0.90258	0.999992	dnj-2	IV	11312437	11313980	-1
WBGene00001021	987.19	-0.0463234	0.111522	-0.415375	0.677868	0.999992	dnj-3	V	15068678	15069504	1
WBGene00001022	2210.98	0.050538	0.106081	0.47641	0.633782	0.999992	dnj-4	I	5282085	5283944	-1
WBGene00001023	54658	-0.0190503	0.0602477	-0.316199	0.751851	0.999992	dnj-5	II	6853464	6858298	-1
WBGene00001025	4849.04	0.0182996	0.0612115	0.298957	0.764973	0.999992	dnj-7	X	7194564	7198291	1
WBGene00001026	11795.7	0.0415272	0.158053	0.262743	0.792749	0.999992	dnj-8	II	6594382	6598080	-1
WBGene00001027	6870.92	0.0563474	0.0965811	0.58342	0.55961	0.999992	dnj-9	II	4852056	4857880	1
WBGene00001028	7050.39	0.0151123	0.0443867	0.340468	0.733504	0.999992	dnj-10	III	8631165	8633549	1
WBGene00001029	28318.2	-0.0443465	0.0597213	-0.742558	0.457749	0.999992	dnj-11	IV	6585871	6588186	1
WBGene00001030	35652	-0.00545842	0.0368421	-0.148157	0.882219	0.999992	dnj-12	I	14756858	14759354	1
WBGene00001031	15905.6	0.0250943	0.0717099	0.349942	0.726383	0.999992	dnj-13	II	11545563	11547366	1
WBGene00001032	2427.34	0.0242797	0.127143	0.190964	0.848554	0.999992	dnj-14	X	4709772	4711744	-1
WBGene00001033	2799.45	-0.0179085	0.0613127	-0.292084	0.770222	0.999992	dnj-15	IV	4176388	4178364	1
WBGene00001034	6781.21	0.0100594	0.0825702	0.121829	0.903035	0.999992	dnj-16	III	4191141	4193427	1
WBGene00001035	6991.75	-0.0439679	0.0649957	-0.676475	0.498739	0.999992	dnj-17	III	13390850	13393339	-1
WBGene00001036	2486.65	0.0196347	0.151619	0.129501	0.896962	0.999992	dnj-18	III	4697987	4699453	1
WBGene00001037	34625.5	0.00180896	0.0386821	0.0467648	0.962701	0.999992	dnj-19	V	5503033	5504856	-1
WBGene00001038	20645.5	0.0668636	0.0661001	1.01155	0.311753	0.999992	dnj-20	II	9617426	9624176	-1
WBGene00001039	1709.76	-0.0329317	0.140001	-0.235225	0.814034	0.999992	dnj-21	I	5676827	5677646	1
WBGene00001040	7791.39	-0.0237476	0.101278	-0.234479	0.814613	0.999992	dnj-22	V	8461096	8462116	-1
WBGene00001041	9263.9	-0.0132759	0.0526354	-0.252224	0.800868	0.999992	dnj-23	II	9107382	9108600	-1
WBGene00001042	1051.54	0.0209551	0.179621	0.116662	0.907128	0.999992	dnj-24	III	5415556	5419565	-1
WBGene00001043	9337.54	-0.0319179	0.048398	-0.659488	0.509583	0.999992	dnj-25	V	20729948	20744385	-1
WBGene00001044	1839.63	0.113117	0.243244	0.465034	0.641907	0.999992	dnj-26	IV	12251111	12252663	-1
WBGene00001045	4094.24	0.000228485	0.0835926	0.00273331	0.997819	0.999992	dnj-27	I	11877803	11887278	1
WBGene00001046	5776.55	-0.0525844	0.104211	-0.504594	0.613844	0.999992	dnj-28	I	2996401	3001382	1
WBGene00001047	22953.1	0.00733525	0.0733381	0.10002	0.920329	0.999992	dnj-29	I	14104429	14113179	-1
WBGene00001048	4791.49	-0.0464188	0.0598578	-0.775484	0.438054	0.999992	dnj-30	I	2718027	2721475	-1
WBGene00001049	7695.24	0.037516	0.0590303	0.635539	0.525077	0.999992	dog-1	I	15017283	15023017	-1
WBGene00001050	3724.47	-0.0468798	0.134928	-0.347444	0.728258	0.999992	dom-3	I	5003351	5005163	1
WBGene00001051	13625.5	0.0461471	0.0753738	0.612244	0.540377	0.999992	cks-1	IV	8513919	8514725	1
WBGene00001052	175.447	-0.128183	0.333686	-0.384144	0.700872	0.999992	dop-1	X	4411359	4416079	-1
WBGene00001053	266.95	-0.00994983	0.150923	-0.0659265	0.947436	0.999992	dop-2	V	9608562	9614942	1
WBGene00001054	568.454	-0.0471247	0.124622	-0.378142	0.705325	0.999992	dpf-1	V	15471335	15476122	1
WBGene00001055	2658.46	-0.0219446	0.164109	-0.133719	0.893624	0.999992	dpf-2	X	14831824	14838241	1
WBGene00001056	31022.6	-0.014256	0.067597	-0.210896	0.832968	0.999992	dpf-3	I	6838354	6843343	1
WBGene00001057	12767.8	-0.0178629	0.0685932	-0.260418	0.794541	0.999992	dpf-4	III	5859308	5861907	1
WBGene00001058	30223.7	0.00936694	0.0414929	0.225748	0.821397	0.999992	dpf-5	IV	4802702	4806586	-1
WBGene00001059	481.234	-0.267971	0.250889	-1.06808	0.285483	0.999992	dpf-6	III	8038241	8041374	1
WBGene00001060	7497.14	-0.0463706	0.128573	-0.360655	0.718357	0.999992	dpf-7	IV	4799388	4802592	-1
WBGene00001061	13368.5	-0.0134698	0.0847372	-0.15896	0.8737	0.999992	dpl-1	II	9169910	9172565	1
WBGene00001063	186.057	0.0415296	0.272292	0.152519	0.878778	0.999992	dpy-1	III	2035036	2048007	-1
WBGene00001064	642.353	0.0505542	0.28054	0.180203	0.856993	0.999992	dpy-2	II	6714292	6715971	1
WBGene00001065	391.628	0.116109	0.244207	0.475454	0.634464	0.999992	dpy-3	X	2144605	2145647	-1
WBGene00001066	763.634	0.0995835	1.05689	0.0942231	0.924932	0.999992	dpy-4	IV	14985543	14986784	-1
WBGene00001067	808.782	0.0827414	1.05288	0.0785854	0.937362	0.999992	dpy-5	I	5432158	5433054	-1
WBGene00001068	456.966	0.0788207	0.265079	0.297348	0.766201	0.999992	dpy-6	X	8450381	8455640	-1
WBGene00001069	495.684	0.0883945	0.196982	0.448744	0.653616	0.999992	dpy-7	X	7536417	7537792	-1
WBGene00001070	182.763	0.0250396	0.506373	0.049449	0.960562	0.999992	dpy-8	X	5148804	5150476	-1
WBGene00001071	190.695	0.0384563	0.482912	0.0796343	0.936528	0.999992	dpy-9	IV	257384	259204	-1
WBGene00001072	1492.73	-0.0654432	0.282595	-0.231579	0.816865	0.999992	dpy-10	II	6710156	6711866	-1
WBGene00001073	13900.3	-0.00839195	0.0695587	-0.120646	0.903972	0.999992	dpy-11	V	6511588	6515240	-1
WBGene00001074	864.969	0.0661012	1.05331	0.0627559	0.949961	0.999992	dpy-13	IV	4235614	4236710	1
WBGene00001075	4598.09	-0.0416003	0.229911	-0.180941	0.856414	0.999992	dpy-14	I	6843589	6845134	1
WBGene00001076	7398.55	-0.0560899	0.194199	-0.288827	0.772714	0.999992	dpy-17	III	5107330	5108497	1
WBGene00001077	4025.91	-0.0139342	0.0972675	-0.143257	0.886087	0.999992	dpy-18	III	11372886	11377980	-1
WBGene00001078	703.274	0.159252	0.238117	0.668798	0.503624	0.999992	dpy-19	III	8659872	8667482	-1
WBGene00001079	6.72617	-0.239576	1.99769	-0.119927	0.904541	0.999992	dpy-20	IV	11696443	11699895	-1
WBGene00001080	9759.19	-0.000372949	0.0646586	-0.00576797	0.995398	0.999992	dpy-21	V	17936332	17949184	-1
WBGene00001081	8805.42	-0.0433198	0.0724292	-0.598099	0.549774	0.999992	dpy-22	X	9810202	9822273	-1
WBGene00001082	6051.88	0.0118455	0.0629552	0.188158	0.850753	0.999992	dpy-23	X	4389365	4393796	1
WBGene00001085	20303	-0.0229571	0.0532418	-0.431185	0.666334	0.999992	dpy-26	IV	12445801	12451299	-1
WBGene00001086	6939.87	0.0145149	0.0658278	0.220498	0.825484	0.999992	dpy-27	III	3813519	3819679	-1
WBGene00001087	11467.6	-0.0509452	0.0906322	-0.562109	0.574042	0.999992	dpy-28	III	10763131	10777343	1
WBGene00001088	11677.9	-0.0265135	0.0776278	-0.341547	0.732692	0.999992	dpy-30	V	12191519	12192211	1
WBGene00001089	4053.55	-0.0105171	0.0806764	-0.130362	0.89628	0.999992	dre-1	V	6533614	6546491	-1
WBGene00001090	8403.15	-0.0701647	0.0988338	-0.709926	0.47775	0.999992	drh-1	IV	6607376	6613353	-1
WBGene00001091	9834.55	-0.0280145	0.0815892	-0.34336	0.731327	0.999992	drh-2	IV	6613918	6618498	-1
WBGene00001092	4530.47	-0.0505258	0.0763088	-0.662123	0.507892	0.999992	dro-1	III	13342684	13343337	1
WBGene00001093	22917.5	-0.0167578	0.064533	-0.259678	0.795112	0.999992	drp-1	IV	5537981	5541365	1
WBGene00001094	34117.4	-0.00835537	0.0538569	-0.15514	0.876711	0.999992	dars-1	III	9489176	9491236	-1
WBGene00001095	3919.03	0.0440137	0.140698	0.312824	0.754414	0.999992	dars-2	V	12048745	12052182	1
WBGene00001096	8.78166	0.126506	0.791111	0.159909	0.872953	0.999992	dsc-1	X	15031353	15034541	-1
WBGene00001099	6397.75	-0.0277577	0.0645408	-0.43008	0.667138	0.999992	dsc-4	IV	315056	320605	-1
WBGene00001101	3046.37	-0.0210143	0.0906587	-0.231796	0.816696	0.999992	dsh-1	II	5214441	5225377	-1
WBGene00001102	13582.7	-0.0512566	0.0563422	-0.909739	0.36296	0.999992	dsh-2	II	5078235	5081161	-1
WBGene00001103	109.986	-0.123402	0.303369	-0.406773	0.684174	0.999992	dsl-1	IV	1207255	1208102	-1
WBGene00001104	714.101	-0.0654259	0.131956	-0.495816	0.620024	0.999992	dsl-2	IV	1202651	1204970	-1
WBGene00001105	463.012	-0.0441115	0.342639	-0.12874	0.897563	0.999992	dsl-3	IV	1610236	1612915	1
WBGene00001107	5.46869	-0.52869	2.67259	-0.197819	0.843186	0.999992	dsl-5	IV	11619502	11620938	-1
WBGene00001108	146.325	-0.0339984	0.338797	-0.100351	0.920066	0.999992	dsl-6	IV	11396788	11398317	-1
WBGene00001109	116.972	-0.000750382	0.325368	-0.00230625	0.99816	0.999992	dsl-7	V	12993180	12994822	1
WBGene00001110	6314.13	-0.0552382	0.122885	-0.449511	0.653063	0.999992	duo-1	V	11554635	11558127	1
WBGene00001111	23.5447	-0.156797	0.598694	-0.261899	0.793399	0.999992	duo-2	IV	112408	118629	-1
WBGene00001112	13151	0.0100828	0.148638	0.0678342	0.945918	0.999992	duo-3	I	10464328	10471056	-1
WBGene00001113	1691.37	-0.0295832	0.176915	-0.167217	0.867199	0.999992	dur-1	IV	9921955	9928223	-1
WBGene00001115	782.614	-0.0198365	0.0983483	-0.201696	0.840154	0.999992	dyb-1	I	1483083	1490494	1
WBGene00001116	862.077	-0.0102414	0.091506	-0.11192	0.910887	0.999992	dyc-1	X	14049535	14063884	1
WBGene00001117	147.959	0.166705	0.292141	0.570631	0.56825	0.999992	dyf-1	I	4989568	4994675	-1
WBGene00001118	574.527	-0.0414533	0.144786	-0.286308	0.774642	0.999992	dyf-2	III	13674917	13686445	-1
WBGene00001119	3444.33	0.00461836	0.183531	0.0251639	0.979924	0.999992	dyf-3	IV	3396581	3399123	-1
WBGene00001121	83.0371	-0.0956172	0.384082	-0.24895	0.8034	0.999992	dyf-5	I	9359075	9364180	1
WBGene00001122	105.378	0.0967995	0.285777	0.338724	0.734818	0.999992	dyf-6	X	10379693	10386508	-1
WBGene00001123	362.712	-0.028888	0.451483	-0.0639846	0.948983	0.999992	dyf-7	X	9698678	9701679	1
WBGene00001127	53.3152	-0.209295	0.420812	-0.497359	0.618936	0.999992	dyf-11	X	763769	766713	1
WBGene00001129	38.3437	-0.408467	0.585622	-0.697492	0.485495	0.999992	dyf-13	II	7168817	7171355	-1
WBGene00001130	10851.1	0.00347605	0.0443667	0.078348	0.937551	0.999992	dyn-1	X	15568890	15573693	1
WBGene00001131	7772	-0.0316143	0.133438	-0.236922	0.812718	0.999992	dys-1	I	11526918	11557851	-1
WBGene00001132	8046.88	0.022316	0.171012	0.130494	0.896176	0.999992	alp-1	IV	8852500	8862228	1
WBGene00001133	62.303	-0.240431	0.345804	-0.695282	0.486879	0.999992	eat-2	II	14166882	14171648	-1
WBGene00001134	17126.1	0.00636983	0.0659857	0.0965335	0.923097	0.999992	eat-3	II	9324874	9329665	1
WBGene00001135	292.787	0.00781051	0.18061	0.0432453	0.965506	0.999992	eat-4	III	9136916	9141822	1
WBGene00001136	159.23	0.176703	0.246255	0.71756	0.473028	0.999992	eat-5	I	7308603	7311939	-1
WBGene00001137	141178	-0.0276137	0.0709473	-0.389214	0.697118	0.999992	eat-6	V	13126414	13129995	-1
WBGene00001145	1940.47	0.0253541	0.0682517	0.37148	0.71028	0.999992	eat-16	I	9722550	9726282	1
WBGene00001147	128.357	0.0689303	0.366765	0.187941	0.850923	0.999992	eat-18	I	14391960	14395241	1
WBGene00001148	3405.35	-0.00294379	0.0698206	-0.0421622	0.966369	0.999992	eat-20	X	15516655	15524020	1
WBGene00001149	22139.1	0.00578262	0.0983089	0.0588209	0.953095	0.999992	bcat-1	X	12877480	12880328	1
WBGene00001150	281.837	-0.133467	0.251058	-0.531618	0.594991	0.999992	ech-1.1	V	15357696	15360738	-1
WBGene00001151	4629.88	-0.0686376	0.0834134	-0.822861	0.410587	0.999992	ech-2	IV	11854828	11856376	-1
WBGene00001152	1143.82	0.029685	0.112644	0.26353	0.792142	0.999992	ech-3	V	8022218	8023308	1
WBGene00001153	12063.3	0.000230987	0.0559187	0.00413077	0.996704	0.999992	ech-4	II	10821015	10822443	1
WBGene00001154	7886.77	-0.0400785	0.0883872	-0.453442	0.650231	0.999992	ech-5	IV	797023	799922	1
WBGene00001155	61840.5	-0.0151953	0.0722727	-0.21025	0.833472	0.999992	ech-6	III	9751440	9752922	-1
WBGene00001156	7434.81	-0.0120861	0.169901	-0.0711361	0.943289	0.999992	ech-7	I	14367608	14369773	-1
WBGene00001157	1180.82	0.0530616	0.209158	0.253692	0.799733	0.999992	ech-8	IV	10236626	10239176	-1
WBGene00001158	116.581	0.150341	0.55431	0.271223	0.78622	0.999992	ech-9	IV	10233321	10235329	-1
WBGene00001159	295.856	0.0753653	0.158867	0.474392	0.635221	0.999992	eff-1	II	8346690	8350557	1
WBGene00001160	10332.6	0.0436341	0.0866297	0.503685	0.614483	0.999992	efk-1	III	6164909	6168547	-1
WBGene00001161	7691.3	-0.0147352	0.0612483	-0.240582	0.809879	0.999992	efl-1	V	16958657	16965675	-1
WBGene00001162	3126.18	-0.0312575	0.0733172	-0.426332	0.669866	0.999992	efl-2	II	13406160	13411483	1
WBGene00001163	503.986	0.131179	0.152282	0.861421	0.389006	0.999992	efn-2	IV	10576350	10578288	1
WBGene00001164	556.532	-0.0174898	0.176279	-0.0992167	0.920966	0.999992	efn-3	X	13475964	13477456	-1
WBGene00001165	1123.11	0.0308317	0.164674	0.187229	0.851481	0.999992	efn-4	IV	559234	568076	1
WBGene00001166	28732.8	0.0041226	0.0495445	0.0832101	0.933684	0.999992	eftu-2	III	6009550	6012839	1
WBGene00001167	639609	-0.0143254	0.0860518	-0.166474	0.867784	0.999992	eef-2	I	9163531	9166952	1
WBGene00001168	1.10168e+06	-0.0333731	0.0864361	-0.386102	0.699421	0.999992	eef-1A.1	III	6970026	6972003	-1
WBGene00001169	48553.2	-0.0114919	0.111291	-0.103259	0.917757	0.999992	eef-1A.2	X	7823652	7825769	1
WBGene00001170	110.42	0.0425841	0.39801	0.106993	0.914795	0.999992	egl-1	V	14431310	14432359	-1
WBGene00001171	235.577	-0.0557168	0.213209	-0.261325	0.793842	0.999992	egl-2	V	1288841	1299332	-1
WBGene00001172	6005.72	-0.063883	0.112125	-0.569749	0.568848	0.999992	egl-3	V	10169197	10173753	-1
WBGene00001173	39537.7	0.00424968	0.0681972	0.0623145	0.950312	0.999992	egl-4	IV	1847968	1880587	1
WBGene00001174	139.887	-0.137453	0.228692	-0.601039	0.547814	0.999992	egl-5	III	7814380	7817127	1
WBGene00001175	542.501	0.090475	0.201711	0.448538	0.653765	0.999992	egl-6	X	5931122	5934532	1
WBGene00001177	9383.06	-0.0373537	0.0788118	-0.473961	0.635528	0.999992	egl-8	V	20825	43697	1
WBGene00001178	2444.39	-0.00602169	0.0650753	-0.0925341	0.926274	0.999992	egl-9	V	10468411	10476952	1
WBGene00001179	2671.78	0.0247678	0.112098	0.220947	0.825133	0.999992	egl-10	V	12453955	12463008	-1
WBGene00001182	1229.5	-0.0738754	0.101212	-0.729907	0.465447	0.999992	egl-13	X	5663837	5674060	1
WBGene00001184	1157.35	0.0248941	0.118125	0.210743	0.833088	0.999992	egl-15	X	11016410	11023421	1
WBGene00001185	40.5491	0.12996	0.401236	0.3239	0.746014	0.999992	egl-17	X	489695	492273	1
WBGene00001186	4677.8	-0.030474	0.0530159	-0.57481	0.56542	0.999992	egl-18	IV	1902323	1917841	1
WBGene00001187	2393.09	0.0548945	0.120628	0.455071	0.649058	0.999992	egl-19	IV	7405460	7418733	1
WBGene00001188	356.309	0.0400639	0.181835	0.220331	0.825613	0.999992	egl-20	IV	9812444	9815526	-1
WBGene00001189	7055.1	-0.0316284	0.107576	-0.294011	0.768749	0.999992	egl-21	IV	10478450	10481844	-1
WBGene00001190	374.911	0.108089	0.207203	0.521656	0.60191	0.999992	egl-23	IV	13989094	14012026	1
WBGene00001193	1694.37	0.0196468	0.101367	0.193819	0.846318	0.999992	egl-26	II	69654	71279	1
WBGene00001194	22745.4	0.0729013	0.087812	0.830198	0.406427	0.999992	egl-27	II	6835021	6847906	1
WBGene00001196	14986.1	-0.0204037	0.0674534	-0.302486	0.762282	0.999992	egl-30	I	1835631	1841936	1
WBGene00001202	230.097	0.131237	0.293043	0.447843	0.654267	0.999992	egl-36	X	10734326	10744355	1
WBGene00001204	94.8552	0.106148	0.363366	0.292125	0.770191	0.999992	egl-38	IV	10106917	10110412	-1
WBGene00001207	348.381	-0.0563101	0.229558	-0.245298	0.806226	0.999992	egl-43	II	9955185	9962344	1
WBGene00001208	2533.49	0.0939349	0.125612	0.747816	0.454571	0.999992	egl-44	II	5928830	5940815	1
WBGene00001209	48814	0.00307405	0.0516215	0.0595498	0.952514	0.999992	egl-45	III	7824377	7828626	-1
WBGene00001210	753.316	-0.0602736	0.256966	-0.234559	0.814551	0.999992	egl-46	V	6679317	6681573	-1
WBGene00001211	43.7403	0.17693	0.555979	0.318231	0.750309	0.999992	egl-47	V	9899587	9907644	1
WBGene00001214	19832.2	-0.0313063	0.0696304	-0.449607	0.652994	0.999992	ego-1	I	7650418	7656336	-1
WBGene00001215	15081.5	-0.010885	0.0639403	-0.170237	0.864824	0.999992	ego-2	I	11400612	11416427	-1
WBGene00001223	3.85013	-0.379152	1.54839	-0.244868	0.806559	0.999992	ehn-3	IV	5416906	5419195	-1
WBGene00001224	11743.5	-0.0547139	0.0813665	-0.672437	0.501305	0.999992	ehs-1	II	5820712	5823862	1
WBGene00001225	42828.6	-0.0295166	0.0570349	-0.517518	0.604795	0.999992	eif-3.B	II	14795404	14798224	1
WBGene00001226	46546.6	-0.0405542	0.0518066	-0.782799	0.433745	0.999992	eif-3.C	I	9976393	9979662	-1
WBGene00001227	35193.6	-0.0583183	0.0739953	-0.788136	0.430617	0.999992	eif-3.D	III	8969638	8971578	-1
WBGene00001228	26566.7	-0.0214049	0.0383798	-0.557713	0.577041	0.999992	eif-3.E	I	10640465	10642281	-1
WBGene00001229	19772.9	-0.0423834	0.0524564	-0.807974	0.419106	0.999992	eif-3.F	II	9331643	9333925	1
WBGene00001230	15952.1	-0.0348363	0.0639779	-0.544505	0.586094	0.999992	eif-3.G	II	8442765	8444239	1
WBGene00001231	18220.7	-0.0484576	0.0722955	-0.670271	0.502685	0.999992	eif-3.H	I	4444719	4446598	1
WBGene00001232	28438.8	-0.0318751	0.0670229	-0.475586	0.63437	0.999992	eif-3.I	I	2485867	2489780	1
WBGene00001233	12958.1	-0.0467428	0.0562235	-0.831375	0.405762	0.999992	eif-3.K	V	12954002	12955229	1
WBGene00001234	13747.4	-0.0365493	0.10901	-0.335285	0.73741	0.999992	eif-6	I	12968921	12970238	1
WBGene00001235	3888.78	0.0216877	0.104852	0.206841	0.836134	0.999992	elb-1	III	11718834	11719450	-1
WBGene00001236	6579.65	0.0144	0.0709443	0.202976	0.839154	0.999992	elc-1	III	1415152	1417188	-1
WBGene00001237	6.22373	1.57206	2.04183	0.76993	0.441342	0.999992	elc-2	X	1777355	1778146	-1
WBGene00001239	33588.9	-0.0346846	0.108328	-0.320182	0.748831	0.999992	elo-1	IV	9526359	9528350	1
WBGene00001240	25913.5	-0.034746	0.100141	-0.346971	0.728613	0.999992	elo-2	IV	17466060	17467408	-1
WBGene00001241	13730.3	0.00216825	0.075281	0.0288021	0.977022	0.999992	elo-3	IV	7237722	7239976	1
WBGene00001242	186.514	0.151787	0.24146	0.628622	0.529597	0.999992	elo-4	III	9332269	9334274	-1
WBGene00001243	16833.4	-0.0315153	0.0815953	-0.386239	0.699319	0.999992	elo-5	IV	5374598	5377137	-1
WBGene00001244	25911.5	0.00593163	0.0913587	0.0649268	0.948232	0.999992	elo-6	IV	5386629	5388559	-1
WBGene00001245	108.741	0.233755	0.827738	0.282402	0.777635	0.999992	elo-7	IV	9529947	9531378	1
WBGene00001246	149.778	-0.123213	0.686575	-0.17946	0.857576	0.999992	elo-8	III	11230378	11232164	-1
WBGene00001247	879.827	0.0807918	0.172922	0.467216	0.640346	0.999992	elo-9	II	14959675	14964108	-1
WBGene00001248	1098.87	-0.0362304	0.113365	-0.31959	0.749279	0.999992	elp-1	V	20764955	20770161	-1
WBGene00001249	1093	-0.0594658	0.105387	-0.564261	0.572576	0.999992	elt-1	IV	9614970	9620140	1
WBGene00001250	1595.13	-0.0428307	0.143924	-0.297592	0.766014	0.999992	elt-2	X	10481240	10483446	1
WBGene00001251	2120.15	-0.05433	0.111358	-0.487885	0.625631	0.999992	elt-3	X	13934883	13941247	1
WBGene00001252	118.67	-0.0942508	0.292666	-0.322043	0.74742	0.999992	elt-4	X	10475527	10475959	1
WBGene00001253	363.929	-0.159775	0.221835	-0.720242	0.471376	0.999992	elt-6	IV	1917854	1921644	1
WBGene00001258	21674.1	-0.0358284	0.0484092	-0.740116	0.45923	0.999992	emb-4	V	18860287	18894974	-1
WBGene00001259	46780.1	-0.0434271	0.054831	-0.792017	0.428351	0.999992	emb-5	III	4715293	4720670	-1
WBGene00001262	19634.8	-0.00649675	0.0821491	-0.0790849	0.936965	0.999992	emb-8	III	5196678	5199688	-1
WBGene00001263	60197.7	-0.00635773	0.179694	-0.0353809	0.971776	0.999992	emb-9	III	9336881	9344447	-1
WBGene00001281	10378.7	-0.00662183	0.112721	-0.0587452	0.953155	0.999992	emb-27	II	8159865	8162170	-1
WBGene00001284	13190.6	-0.00249804	0.108942	-0.02293	0.981706	0.999992	emb-30	III	9435083	9441539	-1
WBGene00001303	29862.7	-0.0540331	0.116985	-0.461881	0.644166	0.999992	emo-1	V	10896658	10897143	-1
WBGene00001309	8868.85	-0.0047826	0.0518748	-0.092195	0.926543	0.999992	emr-1	I	1842445	1843227	1
WBGene00001310	57.4211	0.108272	0.520039	0.2082	0.835073	0.999992	end-1	V	13985137	13987072	1
WBGene00001311	77.4972	0.220348	0.365075	0.603568	0.546131	0.999992	end-3	V	14014701	14015850	1
WBGene00001320	15964.2	-0.0203199	0.0905754	-0.224342	0.822491	0.999992	ent-1	IV	11653422	11655470	-1
WBGene00001324	18131.3	-0.00182755	0.099019	-0.0184566	0.985275	0.999992	eor-1	IV	4793202	4799378	-1
WBGene00001325	2581.56	-0.0355712	0.0644283	-0.552106	0.580876	0.999992	eor-2	X	14603017	14608655	1
WBGene00001328	20907.9	-0.0338882	0.0911042	-0.371971	0.709914	0.999992	epi-1	IV	10666827	10679289	1
WBGene00001329	12085.1	6.75088e-05	0.0435077	0.00155165	0.998762	0.999992	epn-1	X	14815828	14818507	-1
WBGene00001330	6313.94	0.0163264	0.094125	0.173454	0.862295	0.999992	eps-8	IV	14879490	14900652	1
WBGene00001331	5765.33	-0.0640501	0.0798306	-0.802325	0.422365	0.999992	erd-2.1	X	10156858	10160438	-1
WBGene00001332	6261.85	0.0236174	0.0772696	0.305649	0.759872	0.999992	eri-1	IV	415635	419958	-1
WBGene00001333	41158.6	-0.0161109	0.0544842	-0.295698	0.767461	0.999992	erm-1	I	5284062	5291604	-1
WBGene00001334	9198.18	-0.000450871	0.0465444	-0.00968689	0.992271	0.999992	ero-1	I	14663209	14674822	1
WBGene00001335	1953.33	0.0189085	0.0858817	0.220169	0.825739	0.999992	F35A5.8	X	3800045	3802771	-1
WBGene00001336	25308.3	-0.0174156	0.0450841	-0.386291	0.699281	0.999992	qars-1	IV	15008503	15013183	-1
WBGene00001337	41483.3	-0.0569037	0.0630672	-0.902272	0.366912	0.999992	ears-1	I	10336395	10341178	1
WBGene00001338	2611.39	0.0356629	0.142181	0.250827	0.801948	0.999992	ears-2	IV	388686	390468	-1
WBGene00001340	9008.76	0.00270311	0.0752545	0.0359196	0.971346	0.999992	etr-1	II	162374	170628	1
WBGene00001345	1479.88	0.0142464	0.130787	0.108928	0.913259	0.999992	fos-1	V	6003601	6016087	1
WBGene00001352	15910	0.00663403	0.126876	0.0522877	0.958299	0.999992	evl-14	III	4303096	4313128	-1
WBGene00001358	1604.35	-0.0441605	0.0986551	-0.447625	0.654424	0.999992	evl-20	II	8444307	8445177	1
WBGene00001365	4151.78	-0.0210386	0.0760741	-0.276554	0.782122	0.999992	exc-4	I	14511431	14518719	-1
WBGene00001366	1300.99	0.0305128	0.122374	0.249341	0.803097	0.999992	exc-5	IV	8799089	8813539	-1
WBGene00001368	1164.57	0.10764	0.109676	0.981444	0.326374	0.999992	exc-7	II	9575971	9581490	1
WBGene00001371	2460.26	0.0131471	0.0832055	0.158008	0.874451	0.999992	exl-1	II	14412201	14413516	-1
WBGene00001372	6736.14	-0.0924394	0.107303	-0.861482	0.388973	0.999992	exo-3	I	11907571	11909280	-1
WBGene00001373	48.2466	-0.139182	0.506553	-0.274763	0.783498	0.999992	exp-1	II	6157167	6161094	-1
WBGene00001374	358.856	0.200956	0.221487	0.907305	0.364246	0.999992	exp-2	V	6139836	6143548	1
WBGene00001377	734.145	-0.0681038	0.148017	-0.460108	0.645439	0.999992	eya-1	I	14220783	14231360	-1
WBGene00001385	74749.8	-0.021628	0.140029	-0.154453	0.877253	0.999992	far-1	III	9080371	9081179	-1
WBGene00001386	311655	-0.023936	0.118728	-0.201604	0.840226	0.999992	far-2	III	9081679	9082511	1
WBGene00001387	448.355	0.0254163	0.222446	0.114259	0.909033	0.999992	far-3	V	12996787	12997524	-1
WBGene00001388	41.8742	-0.0934802	0.423065	-0.220959	0.825124	0.999992	far-4	V	12998427	12999659	-1
WBGene00001389	270.803	0.460758	0.40691	1.13234	0.257493	0.999992	far-5	V	12995569	12996836	1
WBGene00001390	3477.43	0.031905	0.136586	0.233589	0.815304	0.999992	far-6	IV	13328359	13329497	1
WBGene00001391	208.866	0.160341	0.223918	0.716067	0.47395	0.999992	far-7	II	319785	321445	1
WBGene00001392	7709.85	0.0139217	0.0756004	0.184149	0.853897	0.999992	far-8	III	842935	843802	1
WBGene00001393	52258.3	0.0253305	0.078795	0.321473	0.747852	0.999992	fat-1	IV	13315644	13318811	1
WBGene00001394	58057.1	0.00201651	0.0691236	0.0291726	0.976727	0.999992	fat-2	IV	13323850	13326394	1
WBGene00001395	12462.5	0.0493293	0.115687	0.426404	0.669813	0.999992	fat-3	IV	9803023	9806119	1
WBGene00001396	26950	0.0764257	0.0930871	0.821013	0.411639	0.999992	fat-4	IV	9799429	9802638	1
WBGene00001397	2494.36	-0.0715336	0.0845665	-0.845885	0.397617	0.999992	fat-5	V	17725004	17726818	1
WBGene00001398	26370.2	0.0264719	0.100274	0.263996	0.791783	0.999992	fat-6	IV	11913691	11915796	-1
WBGene00001399	13635.1	0.030624	0.142746	0.214535	0.83013	0.999992	fat-7	V	7151353	7153146	-1
WBGene00001400	49.8563	-0.0194684	0.441916	-0.0440545	0.964861	0.999992	fax-1	X	3196307	3199321	-1
WBGene00001401	4959.77	-0.110475	0.096864	-1.14052	0.254071	0.999992	fbf-1	II	6078265	6080843	-1
WBGene00001402	3813.63	-0.104341	0.132551	-0.787177	0.431178	0.999992	fbf-2	II	6088866	6091480	-1
WBGene00001403	2603.07	-0.0653565	0.0816643	-0.800307	0.423533	0.999992	fbl-1	IV	9540808	9546250	1
WBGene00001404	19093.6	-0.0463696	0.141161	-0.328487	0.742543	0.999992	fbp-1	I	2580935	2586126	-1
WBGene00001405	10434.6	0.0964096	0.147253	0.654718	0.512649	0.999992	fce-1	I	9711064	9712719	-1
WBGene00001406	2795.52	-0.0153865	0.0663855	-0.231776	0.816712	0.999992	fce-2	V	20425301	20431337	1
WBGene00001410	453.446	0.0754107	0.192669	0.391399	0.695502	0.999992	feh-1	III	2549927	2560684	1
WBGene00001411	8857.4	-0.0172024	0.062611	-0.274751	0.783508	0.999992	fem-1	IV	5533142	5537992	-1
WBGene00001412	13878.4	0.0335978	0.0494614	0.679273	0.496965	0.999992	fem-2	III	631938	634645	-1
WBGene00001413	4162.63	0.136714	0.169455	0.806785	0.41979	0.999992	fem-3	IV	9104966	9107609	1
WBGene00001414	331.754	-0.0401759	0.531597	-0.075576	0.939756	0.999992	fer-1	I	8623017	8631184	-1
WBGene00001423	106331	-0.0397286	0.12235	-0.324714	0.745398	0.999992	fib-1	V	15000653	15002273	-1
WBGene00001424	89.0502	0.300022	1.15142	0.260568	0.794426	0.999992	fis-1	II	6755136	6755965	1
WBGene00001425	1892.77	0.0131349	0.0988459	0.132883	0.894286	0.999992	fis-2	X	8283282	8285219	-1
WBGene00001426	8759.62	-0.0474946	0.0690558	-0.687771	0.491597	0.999992	fkb-1	IV	11036548	11038148	1
WBGene00001427	28939.3	-0.0468093	0.114299	-0.409533	0.682149	0.999992	fkb-2	I	12918722	12919278	1
WBGene00001428	2539.75	-0.0263849	0.16867	-0.156428	0.875695	0.999992	fkb-3	V	7225223	7226320	1
WBGene00001429	197.424	-0.115425	0.346803	-0.332825	0.739267	0.999992	fkb-4	V	12785154	12787126	-1
WBGene00001430	3871.3	-0.156589	0.23344	-0.670786	0.502357	0.999992	fkb-5	I	3898046	3899840	-1
WBGene00001431	27864.9	-0.0376218	0.0467321	-0.805053	0.420789	0.999992	fkb-6	V	20846113	20847727	1
WBGene00001432	254.715	0.0198017	0.427478	0.0463222	0.963053	0.999992	fkb-7	I	10667808	10671301	1
WBGene00001433	380.139	-0.134519	0.191795	-0.70137	0.483072	0.999992	fkb-8	I	12916441	12918108	1
WBGene00001434	180.874	-0.00704797	0.284209	-0.0247985	0.980216	0.999992	fkh-2	X	3740208	3742323	-1
WBGene00001435	838.502	0.0647967	0.110277	0.587579	0.556815	0.999992	fkh-3	X	13421824	13423427	-1
WBGene00001436	633.716	0.0453027	0.196006	0.231129	0.817215	0.999992	fkh-4	X	13427062	13428842	-1
WBGene00001437	57.4332	0.220179	0.491208	0.44824	0.65398	0.999992	fkh-5	III	4844662	4846546	1
WBGene00001438	330.956	-0.181035	0.212974	-0.850034	0.395306	0.999992	fkh-6	II	4379652	4383348	-1
WBGene00001439	1626.51	0.00170691	0.0712889	0.0239435	0.980898	0.999992	fkh-7	IV	5584661	5610368	1
WBGene00001440	69.8253	-0.0986889	0.772408	-0.127768	0.898333	0.999992	fkh-8	II	6189580	6191402	-1
WBGene00001441	3885.57	0.105486	0.12958	0.814058	0.415612	0.999992	fkh-9	X	3816851	3826963	-1
WBGene00001442	22.3875	-0.0237155	0.646935	-0.0366582	0.970758	0.999992	fkh-10	I	10163475	10165135	-1
WBGene00001443	13711.3	-0.000457205	0.112888	-0.00405009	0.996769	0.999992	fli-1	III	8675297	8683732	-1
WBGene00001444	1748.71	-0.0142257	0.171212	-0.0830884	0.933781	0.999992	flp-1	IV	9144692	9146122	1
WBGene00001445	247.937	-0.134552	0.28723	-0.468445	0.639467	0.999992	flp-2	X	10094430	10095245	-1
WBGene00001446	806.6	0.0843054	0.119049	0.708156	0.478849	0.999992	flp-3	X	10091961	10092964	-1
WBGene00001447	243.333	-0.0683022	0.205798	-0.331889	0.739973	0.999992	flp-4	II	10054623	10055594	1
WBGene00001448	559.998	-0.0413925	0.158379	-0.26135	0.793822	0.999992	flp-5	X	8528250	8531033	1
WBGene00001449	1170.11	0.036867	0.0830939	0.443679	0.657274	0.999992	flp-6	V	9471975	9473796	1
WBGene00001450	347.767	-0.0425042	0.262449	-0.161952	0.871344	0.999992	flp-7	X	5885865	5886823	1
WBGene00001451	362.216	-0.0584523	0.251189	-0.232703	0.815992	0.999992	flp-8	X	14881419	14882300	1
WBGene00001452	1183.41	-0.0130711	0.0993881	-0.131516	0.895367	0.999992	flp-9	IV	12754558	12757673	-1
WBGene00001453	717.574	0.290536	0.255807	1.13576	0.256056	0.999992	flp-10	IV	7868907	7870100	1
WBGene00001454	686.463	0.00486325	0.138902	0.0350121	0.97207	0.999992	flp-11	X	4677342	4678129	-1
WBGene00001455	719.445	0.0331759	0.130964	0.253321	0.80002	0.999992	flp-12	X	4591281	4592404	-1
WBGene00001456	681.711	0.0932059	0.123175	0.756697	0.449232	0.999992	flp-13	IV	7696932	7698420	-1
WBGene00001457	1466.13	0.0207918	0.204833	0.101506	0.919149	0.999992	flp-14	III	12910510	12914930	1
WBGene00001458	385.578	-0.0334955	0.187608	-0.17854	0.858299	0.999992	flp-15	III	13663400	13667839	-1
WBGene00001459	501.172	-0.17643	0.176514	-0.999525	0.31754	0.999992	flp-16	II	13235306	13237417	1
WBGene00001460	422.853	0.0940268	0.205664	0.457186	0.647537	0.999992	flp-17	IV	17190177	17191891	-1
WBGene00001461	848.572	-0.103261	0.145616	-0.709134	0.478241	0.999992	flp-18	X	3012190	3018555	-1
WBGene00001462	474.456	0.0937041	0.182	0.514858	0.606652	0.999992	flp-19	X	10604686	10605828	1
WBGene00001463	177.211	0.130525	0.236959	0.550836	0.581746	0.999992	flp-20	X	9349276	9349890	-1
WBGene00001464	164.078	0.130189	0.234412	0.555384	0.578632	0.999992	flp-21	V	7793367	7794025	1
WBGene00001465	636.649	-0.0032559	0.147874	-0.022018	0.982434	0.999992	flr-1	X	13452667	13456658	-1
WBGene00001466	116.286	0.19158	0.413975	0.462781	0.643521	0.999992	flr-2	V	11936505	11937794	-1
WBGene00001468	400.299	0.0810818	0.307831	0.263397	0.792245	0.999992	flr-4	X	15089397	15093585	1
WBGene00001470	6560.17	0.00814722	0.113616	0.0717087	0.942834	0.999992	baz-2	III	7650549	7656032	-1
WBGene00001475	1426.1	-0.0064336	0.305423	-0.0210646	0.983194	0.999992	fmi-1	V	13019068	13033373	1
WBGene00001476	1256.67	-0.00925324	0.240941	-0.0384045	0.969365	0.999992	fmo-1	IV	10661857	10664404	1
WBGene00001477	83.8558	0.220962	0.732747	0.301552	0.762993	0.999992	fmo-2	IV	10682524	10684385	1
WBGene00001478	1646.34	0.00943565	0.134768	0.0700139	0.944183	0.999992	fmo-3	III	10694590	10698861	1
WBGene00001479	2993.64	-0.0546262	0.135125	-0.404264	0.686019	0.999992	fmo-4	V	13603276	13606701	-1
WBGene00001480	1367.91	-0.142396	0.158591	-0.897881	0.369249	0.999992	fmo-5	V	899310	903665	-1
WBGene00001481	2227.29	-0.0287957	0.0821576	-0.350493	0.725969	0.999992	fog-1	I	3211046	3217366	1
WBGene00001482	3602.65	0.0971105	0.190293	0.51032	0.609827	0.999992	fog-2	V	20199262	20200640	1
WBGene00001483	72.971	0.0958035	0.599108	0.15991	0.872952	0.999992	fog-3	I	10016778	10018114	1
WBGene00001484	1971.59	-0.0419224	0.0897655	-0.467022	0.640484	0.999992	fox-1	X	2445500	2455949	-1
WBGene00001485	6806.8	0.02111	0.0625471	0.337505	0.735736	0.999992	fre-1	V	20075935	20087733	-1
WBGene00001486	1326.46	0.140502	0.30537	0.460104	0.645441	0.999992	frh-1	II	5917422	5918564	1
WBGene00001487	196.114	0.000250388	0.493394	0.000507481	0.999595	0.999992	frk-1	IV	10043183	10045739	1
WBGene00001488	26066.3	0.0235417	0.0968998	0.242949	0.808045	0.999992	frm-1	I	14875784	14900213	-1
WBGene00001489	2109.03	-0.015923	0.118253	-0.134652	0.892887	0.999992	frm-2	III	5976781	5982126	-1
WBGene00001490	901.804	0.0368864	0.163133	0.226113	0.821114	0.999992	frm-3	X	11572565	11585126	1
WBGene00001491	12341.7	0.0335313	0.108997	0.307636	0.758359	0.999992	frm-4	I	5402889	5408344	-1
WBGene00001492	3372.72	-0.0347682	0.149472	-0.232607	0.816067	0.999992	frm-5.1	IV	32481	48880	-1
WBGene00001493	9247.83	0.079798	0.0927906	0.859979	0.3898	0.999992	frm-7	V	12302484	12306978	1
WBGene00001494	661.132	0.0283236	0.103912	0.272574	0.785181	0.999992	frm-8	III	3200795	3219150	-1
WBGene00001495	270.6	0.0353986	0.223768	0.158193	0.874305	0.999992	frm-9	X	10816968	10838650	-1
WBGene00001496	8567.62	0.0657121	0.198499	0.331045	0.740611	0.999992	frm-10	V	13463128	13467131	1
WBGene00001497	23721.9	-0.0621605	0.0656465	-0.946899	0.34369	0.999992	fars-1	I	6211986	6214645	-1
WBGene00001498	21018.8	-0.0178565	0.0474032	-0.376695	0.7064	0.999992	fars-3	II	8464848	8467072	1
WBGene00001499	15251	-0.0113159	0.0394593	-0.286775	0.774285	0.999992	fsn-1	III	4937322	4939453	1
WBGene00001500	89.8438	0.096659	0.598884	0.161398	0.87178	0.999992	ftn-1	V	7546468	7548012	-1
WBGene00001501	17379.5	-0.0212336	0.160659	-0.132166	0.894853	0.999992	ftn-2	I	3680178	3680944	-1
WBGene00001502	28189.9	-0.00147651	0.0973374	-0.015169	0.987897	0.999992	ftt-2	X	11603709	11605451	-1
WBGene00001503	33165	0.105084	0.130422	0.805724	0.420402	0.999992	fum-1	III	7465605	7467633	1
WBGene00001505	890.217	0.0457193	0.117937	0.387658	0.698269	0.999992	fut-1	II	8756291	8758723	-1
WBGene00001506	20.817	-0.337586	0.71058	-0.475085	0.634727	0.999992	fut-2	V	6573983	6575797	-1
WBGene00001507	140.191	0.182102	0.270423	0.673397	0.500695	0.999992	fut-4	II	2819435	2822490	-1
WBGene00001508	1083.47	-0.12521	0.131247	-0.954003	0.340082	0.999992	fut-8	V	5987003	5990252	-1
WBGene00001509	11815.2	-0.0286233	0.0459431	-0.623017	0.533273	0.999992	fzo-1	II	5833328	5836203	-1
WBGene00001510	9485.14	0.0130671	0.0885513	0.147566	0.882686	0.999992	fzr-1	II	9640167	9644466	-1
WBGene00001511	25455.9	-0.0589268	0.0657447	-0.896298	0.370094	0.999992	fzy-1	II	5501633	5503908	1
WBGene00001512	57.2471	-0.183239	0.418392	-0.437961	0.661415	0.999992	gab-1	III	12771878	12779726	-1
WBGene00001513	16893.2	-0.066924	0.0826424	-0.809803	0.418053	0.999992	gad-1	V	6431331	6433496	-1
WBGene00001514	20826.1	-0.0708843	0.0809047	-0.876146	0.380951	0.999992	xnd-1	III	5604460	5607549	1
WBGene00001515	509.38	-0.0161037	0.137215	-0.117361	0.906574	0.999992	gap-1	X	2192504	2195348	1
WBGene00001516	5835.67	-0.0444377	0.0650006	-0.683651	0.494196	0.999992	gap-2	X	9472469	9516440	1
WBGene00001517	139.383	0.115651	0.341966	0.338195	0.735216	0.999992	gar-1	X	6479447	6484810	-1
WBGene00001518	294.147	0.0275064	0.244264	0.112609	0.91034	0.999992	gar-2	III	6309378	6320872	1
WBGene00001519	389.324	-0.0995092	0.156268	-0.636786	0.524264	0.999992	gar-3	V	14564752	14579719	-1
WBGene00001520	14125.6	-0.0335222	0.144867	-0.231401	0.817004	0.999992	gas-1	X	15586812	15590397	-1
WBGene00001522	1631.02	-0.0334962	0.110081	-0.304287	0.760909	0.999992	gbh-1	II	10690452	10693863	-1
WBGene00001523	716.834	0.156035	0.206249	0.756538	0.449327	0.999992	gbh-2	II	8485879	8487571	1
WBGene00001526	9974.41	0.00273035	0.0771296	0.0353995	0.971761	0.999992	gck-1	V	8947799	8956294	1
WBGene00001527	14160.5	0.00745503	0.0726954	0.102552	0.918319	0.999992	gcs-1	II	9035562	9038301	-1
WBGene00001529	1.79451	-0.00150083	3.82767	-0.000392101	0.999687	0.999992	gcy-2	II	9507604	9512095	-1
WBGene00001530	2.99563	-0.00279885	2.16791	-0.00129104	0.99897	0.999992	gcy-3	II	9502757	9507281	-1
WBGene00001531	10.5055	-0.0184609	0.89159	-0.0207056	0.98348	0.999992	gcy-4	II	10304139	10308826	-1
WBGene00001532	22.4438	0.0434793	0.677839	0.064144	0.948856	0.999992	gcy-5	II	10310400	10316219	-1
WBGene00001533	2.00924	1.46424	2.95794	0.495019	0.620587	0.999992	gcy-6	V	10308291	10314053	-1
WBGene00001535	111.446	-0.137693	0.34904	-0.39449	0.69322	0.999992	gcy-8	IV	7928159	7933775	1
WBGene00001536	214.947	-0.0337959	0.219529	-0.153948	0.877651	0.999992	gcy-9	X	11332553	11338301	-1
WBGene00001537	400.469	-0.0793448	0.208255	-0.380998	0.703205	0.999992	gcy-11	X	17046261	17055581	-1
WBGene00001538	5718.14	-0.0406134	0.0587878	-0.690848	0.489661	0.999992	gcy-12	II	5312046	5319234	1
WBGene00001539	4.92104	0.635095	2.06028	0.308256	0.757888	0.999992	gcy-13	V	12363754	12369537	-1
WBGene00001540	2.03616	-0.00377276	2.27408	-0.00165902	0.998676	0.999992	gcy-14	V	14863168	14867992	-1
WBGene00001541	380.377	-0.0305223	0.144645	-0.211016	0.832875	0.999992	gcy-15	II	3192420	3197066	-1
WBGene00001542	4.48874	-0.0865975	3.60193	-0.024042	0.980819	0.999992	gcy-17	I	2223307	2233099	-1
WBGene00001543	86.5899	-0.158724	0.464145	-0.34197	0.732374	0.999992	gcy-18	IV	12860137	12865935	1
WBGene00001544	108.957	-0.0082455	0.343122	-0.0240309	0.980828	0.999992	gcy-19	II	3250985	3259354	-1
WBGene00001545	14.6085	-0.150554	0.70404	-0.213843	0.830669	0.999992	gcy-20	V	16248583	16253787	-1
WBGene00001546	246.412	-0.0797096	0.179243	-0.444701	0.656536	0.999992	gcy-21	II	2659670	2665022	1
WBGene00001547	68.8778	-0.0988597	0.701666	-0.140893	0.887955	0.999992	gcy-22	V	20820366	20825028	-1
WBGene00001548	196.182	-0.12834	0.279404	-0.459334	0.645994	0.999992	gcy-23	IV	3282885	3289337	-1
WBGene00001549	13.5824	-0.2671	0.698402	-0.382444	0.702132	0.999992	gcy-25	IV	15872933	15882377	1
WBGene00001551	62.5756	-0.0597433	0.376002	-0.158891	0.873755	0.999992	gcy-31	X	2420462	2427504	-1
WBGene00001552	27.5959	-0.2008	0.473541	-0.424039	0.671537	0.999992	gcy-32	V	13912080	13915436	-1
WBGene00001553	57.0154	-0.406678	0.480731	-0.845957	0.397577	0.999992	gcy-33	V	11995868	12001965	-1
WBGene00001554	34.0655	1.99886	1.01171	1.97574	0.0481845	0.999992	gcy-34	V	13383019	13385898	-1
WBGene00001555	105.095	0.127373	0.271367	0.469376	0.638801	0.999992	gcy-35	I	13325230	13333508	1
WBGene00001556	48.6691	0.0978049	0.512018	0.191019	0.848511	0.999992	gcy-36	X	15479017	15485700	1
WBGene00001557	33.974	0.0471368	0.603191	0.0781458	0.937712	0.999992	gcy-37	IV	2150650	2159162	-1
WBGene00001558	49609.2	-0.015361	0.0554177	-0.277185	0.781638	0.999992	gdi-1	IV	14790818	14792887	-1
WBGene00001559	3139.6	0.00452485	0.101831	0.0444347	0.964558	0.999992	gei-1	III	3344875	3363409	1
WBGene00001560	7997.85	0.0466013	0.106704	0.436735	0.662304	0.999992	gei-3	X	12795216	12813947	-1
WBGene00001561	13635.7	0.0230499	0.0553079	0.416757	0.676856	0.999992	gei-4	III	344307	378250	-1
WBGene00001562	7926.92	0.055621	0.0830441	0.669777	0.503	0.999992	lin-66	IV	13888089	13893985	1
WBGene00001563	14937.8	0.0224302	0.0439483	0.510377	0.609787	0.999992	gei-6	V	7226376	7230848	-1
WBGene00001564	22290.6	0.0386231	0.127615	0.302655	0.762153	0.999992	icl-1	V	724207	728103	-1
WBGene00001565	6850.53	0.0502955	0.0688414	0.730599	0.465024	0.999992	gei-8	III	8111166	8126222	-1
WBGene00001566	7332.83	-0.075318	0.0967035	-0.778855	0.436065	0.999992	acdh-13	IV	8496486	8498871	-1
WBGene00001568	14277.6	0.00346206	0.0397243	0.0871522	0.930551	0.999992	snpc-4	I	8962322	8966129	1
WBGene00001569	9275.61	-0.037247	0.0582281	-0.639674	0.522384	0.999992	meg-3	X	1986429	1989607	-1
WBGene00001570	992.276	0.114433	0.250149	0.45746	0.647341	0.999992	gei-13	III	9631994	9637116	-1
WBGene00001571	11510.6	-0.0196921	0.0912394	-0.215828	0.829121	0.999992	gei-14	II	8273543	8276231	-1
WBGene00001572	1756.22	-0.00928947	0.0913442	-0.101697	0.918997	0.999992	gei-15	X	6820005	6823268	-1
WBGene00001574	17667	0.025447	0.0781513	0.325613	0.744717	0.999992	gei-17	I	9100846	9107939	-1
WBGene00001575	41.5762	-0.0300234	0.372925	-0.080508	0.935833	0.999992	gei-18	IV	13981087	13982525	-1
WBGene00001577	889.534	0.0140664	0.23045	0.061039	0.951328	0.999992	gem-4	IV	11745640	11748640	1
WBGene00001578	3797.94	-0.0295686	0.179924	-0.164339	0.869464	0.999992	ges-1	V	1427653	1432137	-1
WBGene00001579	9524.6	-0.0709578	0.0704993	-1.0065	0.314173	0.999992	gex-2	IV	572723	583577	1
WBGene00001580	13027.4	-0.001259	0.0932989	-0.0134943	0.989233	0.999992	gex-3	IV	12404374	12408697	1
WBGene00001581	86563.2	-0.0170938	0.158862	-0.107601	0.914312	0.999992	gfi-1	V	6392541	6399921	-1
WBGene00001582	14470.8	0.026001	0.0953054	0.272818	0.784993	0.999992	gfi-2	I	9737823	9744190	1
WBGene00001583	3704.24	0.00483027	0.0738405	0.0654149	0.947844	0.999992	gfi-3	X	14480572	14484702	1
WBGene00001584	14207.5	0.0424141	0.135626	0.312728	0.754488	0.999992	nrde-4	IV	7646200	7654262	-1
WBGene00001585	4073.43	-0.011328	0.0967614	-0.117072	0.906803	0.999992	gfl-1	IV	11521290	11522214	1
WBGene00001586	40.8854	-0.0270254	0.433437	-0.0623514	0.950283	0.999992	ggr-1	II	10695013	10702524	1
WBGene00001587	70.8121	-0.00900473	0.413652	-0.0217689	0.982632	0.999992	ggr-2	X	6070497	6081833	1
WBGene00001588	85.0968	0.180471	0.306942	0.587963	0.556557	0.999992	ggr-3	II	5130384	5133215	1
WBGene00001589	9162.04	-0.0294782	0.0602612	-0.489174	0.624719	0.999992	gip-1	III	2347591	2362056	1
WBGene00001590	2022.59	0.04923	0.1809	0.272139	0.785515	0.999992	C45G3.3	I	9226905	9228184	1
WBGene00001591	1855.43	0.0194267	0.153878	0.126248	0.899536	0.999992	glc-1	V	16219541	16221948	1
WBGene00001592	980.131	-0.0211457	0.27481	-0.0769466	0.938666	0.999992	glc-2	I	4885062	4888002	-1
WBGene00001593	39.4911	-0.185371	0.433056	-0.428053	0.668613	0.999992	glc-3	V	5449287	5453715	-1
WBGene00001594	342.726	0.042484	0.307716	0.138062	0.890191	0.999992	glc-4	II	7172204	7174936	-1
WBGene00001595	131170	-0.0159111	0.0652613	-0.243806	0.807381	0.999992	gld-1	I	7695661	7698227	1
WBGene00001596	29431.4	0.0223273	0.0775888	0.287764	0.773527	0.999992	gld-2	I	6369934	6386183	1
WBGene00001597	38763.4	-0.00134791	0.104261	-0.0129283	0.989685	0.999992	gld-3	II	7132643	7137522	1
WBGene00001598	72477.5	-0.0887846	0.128303	-0.691993	0.488942	0.999992	glh-1	I	6854688	6857529	1
WBGene00001599	30660.1	-0.0657982	0.0733665	-0.896842	0.369803	0.999992	glh-2	I	6513928	6517507	1
WBGene00001600	7917.45	0.014274	0.048885	0.291992	0.770293	0.999992	glh-3	I	5792324	5795114	-1
WBGene00001601	22771.5	-0.0798624	0.0918197	-0.869773	0.384424	0.999992	glh-4	I	3726011	3731265	1
WBGene00001602	2563.2	-0.0259802	0.151133	-0.171903	0.863514	0.999992	gln-1	X	6058255	6060242	1
WBGene00001603	920.429	-0.0285838	0.866127	-0.0330018	0.973673	0.999992	gln-2	III	9943243	9944823	-1
WBGene00001604	30730.3	-0.18034	0.264694	-0.681316	0.495672	0.999992	gln-3	IV	16167785	16170859	-1
WBGene00001605	27.7885	-0.377891	0.76397	-0.494641	0.620854	0.999992	gln-4	III	13601760	13603156	-1
WBGene00001606	36287.3	-0.0527414	0.0679565	-0.776106	0.437686	0.999992	gln-5	IV	17272231	17273652	-1
WBGene00001607	92203.1	-0.00200298	0.0588291	-0.0340473	0.972839	0.999992	gln-6	IV	9739219	9740908	-1
WBGene00001608	55.6019	-0.0727593	0.563311	-0.129164	0.897228	0.999992	R07B1.8	X	9870804	9872654	-1
WBGene00001609	28437	-0.0312291	0.0616206	-0.506795	0.612298	0.999992	glp-1	III	9092241	9099698	1
WBGene00001612	65.8872	0.0400966	0.362347	0.110658	0.911888	0.999992	glr-1	III	8584186	8588642	-1
WBGene00001613	110.122	0.0753255	0.274645	0.274265	0.783881	0.999992	glr-2	III	7138683	7144832	-1
WBGene00001614	3.90124	1.50996	1.58985	0.949751	0.342239	0.999992	glr-3	I	7117808	7121545	1
WBGene00001615	402.121	-0.000106709	0.185642	-0.00057481	0.999541	0.999992	glr-4	II	7785100	7794319	-1
WBGene00001616	383.875	-0.00432853	0.203058	-0.0213167	0.982993	0.999992	glr-5	V	8716495	8720893	1
WBGene00001617	712.042	0.029181	0.186133	0.156775	0.875422	0.999992	glr-6	X	6836386	6840615	-1
WBGene00001618	37.9245	0.492363	0.581471	0.846753	0.397133	0.999992	glr-7	X	2413909	2419877	-1
WBGene00001619	32.1076	0.062576	0.834393	0.0749958	0.940218	0.999992	glr-8	X	6506276	6509882	1
WBGene00001620	11919.3	-0.0390088	0.127723	-0.305418	0.760048	0.999992	glt-1	X	3496026	3499165	1
WBGene00001621	365.434	0.17624	0.228646	0.770801	0.440825	0.999992	glt-3	IV	10130257	10133283	1
WBGene00001622	1039.29	0.0126391	0.093179	0.135643	0.892103	0.999992	glt-4	X	6403424	6406981	1
WBGene00001623	296.663	0.095789	0.180638	0.530282	0.595916	0.999992	glt-5	II	9706483	9708885	-1
WBGene00001624	266.538	0.0161022	0.231131	0.0696668	0.944459	0.999992	glt-6	IV	7503622	7506447	1
WBGene00001625	70.7475	0.14189	0.53316	0.26613	0.790139	0.999992	glt-7	IV	532135	535703	1
WBGene00001626	18.4765	-0.261523	0.595417	-0.439227	0.660497	0.999992	gly-1	II	10900042	10902204	-1
WBGene00001627	886.407	0.201267	0.23642	0.851313	0.394596	0.999992	gly-2	I	6507894	6511630	1
WBGene00001628	11801.8	0.0390092	0.0508949	0.766465	0.4434	0.999992	gly-3	III	7914314	7917767	-1
WBGene00001629	5924.4	-0.0557983	0.078011	-0.715262	0.474447	0.999992	gly-4	V	19881374	19895350	-1
WBGene00001630	9941.62	-0.0188876	0.0561894	-0.336142	0.736764	0.999992	gly-5	III	13187392	13204897	1
WBGene00001631	3450.29	-0.0265332	0.112686	-0.235462	0.813851	0.999992	gly-6	III	4324280	4331227	-1
WBGene00001632	15272.1	0.0101946	0.0434242	0.234767	0.81439	0.999992	gly-7	V	1815852	1821323	-1
WBGene00001633	3036.76	0.0146702	0.254324	0.057683	0.954001	0.999992	gly-8	III	11624991	11628238	1
WBGene00001635	12930.1	-0.0120438	0.0460958	-0.261277	0.793879	0.999992	gly-10	IV	13778866	13782396	1
WBGene00001636	680.316	0.0743139	0.137941	0.538739	0.590067	0.999992	gly-11	III	12171353	12177245	-1
WBGene00001637	764.403	-0.0438321	0.146501	-0.299193	0.764793	0.999992	gly-12	X	7485864	7490707	1
WBGene00001638	3222.24	-0.0566141	0.127529	-0.44393	0.657093	0.999992	gly-13	X	9293664	9296622	-1
WBGene00001639	219.241	0.0606286	0.217061	0.279317	0.780002	0.999992	gly-14	III	3490363	3493234	-1
WBGene00001643	46.8941	0.287501	0.662404	0.434027	0.664269	0.999992	gly-18	I	7110240	7112287	1
WBGene00001644	305.954	0.11947	0.317358	0.376453	0.70658	0.999992	gly-19	I	7112903	7115001	1
WBGene00001645	12901.1	0.0208752	0.120432	0.173336	0.862387	0.999992	gly-20	V	11282572	11286039	1
WBGene00001646	463.826	0.0961303	0.15642	0.614566	0.538842	0.999992	gna-1	V	10319535	10320158	-1
WBGene00001647	15070.3	0.0199774	0.155464	0.128502	0.897752	0.999992	gna-2	I	7699543	7700958	1
WBGene00001648	21344.1	0.0237758	0.0727733	0.32671	0.743887	0.999992	goa-1	I	7522116	7526703	1
WBGene00001649	4784.2	-0.0421112	0.0977466	-0.43082	0.666599	0.999992	gob-1	X	15493536	15497504	1
WBGene00001650	4000.59	0.00571233	0.1332	0.0428853	0.965793	0.999992	gon-1	IV	9934767	9953433	-1
WBGene00001651	9443.86	0.00350939	0.0734274	0.047794	0.96188	0.999992	gon-2	I	8549513	8570998	-1
WBGene00001653	13235.3	0.0394505	0.135248	0.291691	0.770523	0.999992	gon-4	IV	10197820	10202993	1
WBGene00001660	3921.06	0.0583606	0.158153	0.369013	0.712118	0.999992	gop-1	III	5254438	5258922	1
WBGene00001661	8337.15	0.00956246	0.0873243	0.109505	0.912802	0.999992	gop-2	III	5259023	5260512	1
WBGene00001662	10355	0.0167558	0.0422576	0.396516	0.691724	0.999992	gop-3	III	5260693	5263837	1
WBGene00001663	242.616	-0.00783269	0.252912	-0.03097	0.975293	0.999992	gpa-1	V	11174567	11177559	-1
WBGene00001664	28.9653	0.304208	0.965056	0.315224	0.752592	0.999992	gpa-2	V	8371014	8374027	1
WBGene00001665	40.6762	-0.00129318	0.433187	-0.00298526	0.997618	0.999992	gpa-3	V	9356750	9359774	-1
WBGene00001666	178.929	0.0597674	0.283251	0.211005	0.832884	0.999992	gpa-4	IV	401695	405346	1
WBGene00001668	22.6533	0.578745	0.714635	0.809847	0.418028	0.999992	gpa-6	X	13191246	13193955	1
WBGene00001669	321.59	0.137056	0.193465	0.708424	0.478682	0.999992	gpa-7	IV	10404012	10408530	1
WBGene00001671	71.2053	-0.263764	0.360504	-0.731652	0.464381	0.999992	gpa-9	V	12646827	12649313	-1
WBGene00001672	16.1407	-0.361604	0.898733	-0.402349	0.687427	0.999992	gpa-10	V	6852568	6854803	-1
WBGene00001673	9.90374	0.88723	1.36051	0.652131	0.514317	0.999992	gpa-11	II	4247197	4255281	1
WBGene00001674	471.789	0.0397593	0.176906	0.224749	0.822175	0.999992	gpa-12	X	9247007	9249103	1
WBGene00001675	55.3406	0.0293402	0.350793	0.0836397	0.933343	0.999992	gpa-13	V	12752762	12754893	-1
WBGene00001676	36.8334	-0.0746951	0.474387	-0.157456	0.874885	0.999992	gpa-14	I	5942419	5945537	1
WBGene00001677	23.9615	0.217465	0.73407	0.296245	0.767043	0.999992	gpa-15	I	8531760	8534527	-1
WBGene00001678	6850.8	0.0327601	0.0558109	0.586983	0.557215	0.999992	gpa-16	I	897286	906077	1
WBGene00001679	22406.7	0.0458572	0.0530981	0.86363	0.387791	0.999992	gpb-1	II	11742814	11748603	-1
WBGene00001680	1276.93	0.0864133	0.122593	0.70488	0.480885	0.999992	gpb-2	I	7318290	7321085	-1
WBGene00001681	138.289	0.0702064	0.231282	0.303554	0.761468	0.999992	gpc-1	X	12881126	12884989	-1
WBGene00001682	3653.26	0.0127465	0.0910047	0.140064	0.888609	0.999992	gpc-2	I	6757763	6758178	1
WBGene00001683	55155.9	-0.0438821	0.0745597	-0.58855	0.556163	0.999992	gpd-1	II	10394114	10395349	1
WBGene00001684	34869.7	-0.0110455	0.165131	-0.0668897	0.94667	0.999992	gpd-2	X	3113434	3114771	-1
WBGene00001685	50136	-0.0346427	0.164012	-0.211221	0.832715	0.999992	gpd-3	X	3112083	3113382	-1
WBGene00001686	38701.4	-0.0477823	0.0770421	-0.62021	0.535119	0.999992	gpd-4	II	10171255	10172497	1
WBGene00001687	179.805	-0.0968006	0.306478	-0.315849	0.752117	0.999992	gpn-1	X	15681693	15687477	1
WBGene00001688	3341.54	-0.0712115	0.0765352	-0.930441	0.352143	0.999992	gpr-1	III	8628926	8630776	1
WBGene00001689	4719.6	-0.0843632	0.0786652	-1.07243	0.283525	0.999992	gpr-2	III	9391270	9393164	-1
WBGene00001690	290.661	-0.0216612	0.242877	-0.0891858	0.928934	0.999992	grd-1	X	11109440	11115887	1
WBGene00001691	10.9154	-0.0308467	0.707753	-0.043584	0.965236	0.999992	grd-2	V	20609794	20613929	1
WBGene00001692	10055	-0.0266434	0.227709	-0.117006	0.906855	0.999992	grd-3	IV	3439655	3440453	1
WBGene00001693	162.381	-0.115861	0.467244	-0.247968	0.804159	0.999992	grd-4	X	8501245	8502289	1
WBGene00001694	6495.43	-0.0398682	0.193706	-0.205818	0.836933	0.999992	grd-5	V	8619032	8619869	1
WBGene00001695	173.477	0.0365791	0.780953	0.0468391	0.962641	0.999992	grd-6	V	9221866	9224354	1
WBGene00001696	10.3768	0.0764407	1.00039	0.0764105	0.939093	0.999992	grd-7	X	7267989	7269479	-1
WBGene00001698	7.5704	1.53946	1.98655	0.774939	0.438376	0.999992	grd-9	V	5895388	5898602	1
WBGene00001699	469.046	0.0144797	0.443017	0.0326843	0.973926	0.999992	grd-10	IV	3441055	3441770	1
WBGene00001700	47.6091	0.101438	0.496491	0.204309	0.838112	0.999992	grd-11	V	20356802	20365718	1
WBGene00001701	11.7261	0.463782	1.28966	0.359616	0.719134	0.999992	grd-12	V	14978505	14980159	1
WBGene00001702	365.032	-0.055786	0.47848	-0.11659	0.907185	0.999992	grd-13	IV	3438312	3439503	1
WBGene00001703	1350.66	0.0198648	0.310898	0.0638948	0.949054	0.999992	grd-14	X	8499664	8501037	1
WBGene00001704	22.848	0.399086	0.584326	0.682986	0.494616	0.999992	grd-15	I	13564567	13566362	1
WBGene00001705	42.6053	0.0166651	0.560552	0.0297298	0.976283	0.999992	grd-16	IV	2476700	2480218	1
WBGene00001706	3.31545	-0.00255354	2.15565	-0.00118458	0.999055	0.999992	grd-17	V	16990810	16991459	1
WBGene00001707	492.618	0.0805846	0.134434	0.599438	0.548881	0.999992	grh-1	I	1259374	1268155	-1
WBGene00001708	3878.69	-0.0274311	0.0702379	-0.390546	0.696133	0.999992	grk-1	X	9991255	9999178	-1
WBGene00001709	1155.52	-0.0140212	0.0979615	-0.14313	0.886188	0.999992	grk-2	III	676122	680253	1
WBGene00001710	50.2168	-0.299352	0.634686	-0.471654	0.637174	0.999992	grl-1	V	5530725	5533845	-1
WBGene00001711	29.8994	0.517877	0.645175	0.802693	0.422152	0.999992	grl-2	V	12944861	12946853	1
WBGene00001712	20.2333	0.334402	0.62637	0.533873	0.593429	0.999992	grl-3	V	11411511	11412769	1
WBGene00001713	2092.47	0.0429237	0.21492	0.19972	0.8417	0.999992	grl-4	IV	7309838	7310760	-1
WBGene00001714	86.7894	-0.163108	0.515451	-0.316438	0.75167	0.999992	grl-5	V	4412748	4414663	-1
WBGene00001715	5.03903	-0.0492249	2.02109	-0.0243557	0.980569	0.999992	grl-6	X	6449959	6450939	-1
WBGene00001716	212.12	0.0124358	0.416487	0.0298588	0.97618	0.999992	grl-7	V	11344831	11347012	-1
WBGene00001717	76.5735	-0.00143461	0.559831	-0.00256258	0.997955	0.999992	grl-8	V	6731831	6733092	-1
WBGene00001718	13.1522	1.25924	0.965833	1.30378	0.192307	0.999992	grl-9	V	6730281	6731694	-1
WBGene00001719	214.014	0.0330833	0.267937	0.123474	0.901732	0.999992	grl-10	V	7774441	7775759	1
WBGene00001723	52.032	0.329731	0.668116	0.493523	0.621643	0.999992	grl-14	V	20825559	20827740	1
WBGene00001724	306.722	-0.0908325	0.279331	-0.325179	0.745046	0.999992	grl-15	III	12232632	12235711	-1
WBGene00001725	881.238	0.00987832	0.917589	0.0107655	0.991411	0.999992	grl-16	I	572177	575120	-1
WBGene00001726	32.4281	-0.0324799	0.435867	-0.0745178	0.940598	0.999992	grl-17	V	13562105	13563913	-1
WBGene00001727	113.607	-0.23557	0.342762	-0.68727	0.491913	0.999992	grl-18	V	5485697	5488866	-1
WBGene00001728	2.25415	-0.499821	3.8088	-0.131228	0.895595	0.999992	grl-19	IV	251970	252554	-1
WBGene00001729	5.26357	0.255141	2.74298	0.0930159	0.925891	0.999992	grl-20	IV	2126145	2128852	-1
WBGene00001730	68.1731	-0.123353	0.451431	-0.273248	0.784663	0.999992	grl-21	IV	10737474	10738189	1
WBGene00001731	111.957	0.0794366	0.260821	0.304563	0.760699	0.999992	grl-22	III	5413137	5413993	-1
WBGene00001733	4.83307	-0.628097	1.99951	-0.314125	0.753426	0.999992	grl-24	IV	17475417	17475838	-1
WBGene00001734	18.1676	0.575271	0.793715	0.724783	0.468585	0.999992	grl-25	III	8962295	8965638	1
WBGene00001735	14.4098	0.157376	0.705382	0.223108	0.823451	0.999992	grl-26	IV	321571	323022	-1
WBGene00001736	99.7128	-0.309877	0.504356	-0.614403	0.538949	0.999992	grl-27	V	3575055	3575874	-1
WBGene00001737	6.1231	-0.181954	1.10374	-0.164853	0.86906	0.999992	grl-28	V	3551346	3551865	-1
WBGene00001740	2217.43	0.0054148	0.162813	0.0332577	0.973469	0.999992	gro-1	III	5265113	5267204	1
WBGene00001743	8741.33	0.0210935	0.0871419	0.242059	0.808735	0.999992	grp-1	III	8085705	8088449	1
WBGene00001744	32858.4	-0.0252443	0.039454	-0.639841	0.522276	0.999992	gars-1	III	5159729	5163627	-1
WBGene00001745	1685.51	0.0293326	0.162613	0.180383	0.856852	0.999992	gsa-1	I	1068484	1075010	1
WBGene00001746	11943.7	-0.00023504	0.076413	-0.00307591	0.997546	0.999992	gsk-3	I	12819216	12825562	1
WBGene00001747	25069.2	0.0257571	0.0591659	0.435337	0.663318	0.999992	gsp-1	V	10682422	10686537	1
WBGene00001748	44295.3	0.00239018	0.0324785	0.0735926	0.941335	0.999992	gsp-2	III	7336587	7338765	1
WBGene00001749	15875.5	-0.040644	0.053038	-0.766318	0.443487	0.999992	gst-1	III	9059314	9060181	1
WBGene00001750	47.3221	0.473425	0.502074	0.94294	0.345712	0.999992	gst-2	IV	10140330	10141513	-1
WBGene00001751	76.5676	-0.026412	0.30506	-0.0865795	0.931006	0.999992	gst-3	IV	10139380	10140285	-1
WBGene00001752	1366.49	0.0279687	0.138518	0.201913	0.839984	0.999992	gst-4	IV	10142135	10143099	1
WBGene00001753	1926.15	-0.0496027	0.205877	-0.240933	0.809607	0.999992	gst-5	II	10950350	10951604	1
WBGene00001754	619.863	-0.0116503	0.101627	-0.114638	0.908732	0.999992	gst-6	II	4879885	4881105	1
WBGene00001755	22796.7	-0.0356681	0.0461224	-0.773336	0.439324	0.999992	gst-7	II	4882062	4883358	1
WBGene00001756	20.2632	-0.452919	1.28171	-0.353372	0.72381	0.999992	gst-8	II	4883749	4884602	1
WBGene00001757	82.5213	0.064813	0.281182	0.230502	0.817702	0.999992	gst-9	II	4891573	4893573	1
WBGene00001758	2849.41	-0.0764043	0.308001	-0.248065	0.804084	0.999992	gst-10	V	2561690	2564701	1
WBGene00001759	75.1884	-0.203677	0.428006	-0.475873	0.634165	0.999992	gst-11	X	3632367	3633747	-1
WBGene00001760	245.898	-0.0110553	0.207744	-0.0532161	0.95756	0.999992	gst-12	II	13616685	13618061	-1
WBGene00001761	2686.28	-0.0503953	0.0701407	-0.718488	0.472456	0.999992	gst-13	II	9231457	9232340	1
WBGene00001762	26.2827	0.00380609	0.768385	0.00495336	0.996048	0.999992	gst-14	II	13614788	13616100	-1
WBGene00001763	203.389	-0.0419332	0.241762	-0.173448	0.862299	0.999992	gst-15	II	13611771	13613196	-1
WBGene00001764	262.226	0.0413983	0.157201	0.263347	0.792283	0.999992	gst-16	II	13622967	13624502	-1
WBGene00001765	42.1068	-0.139305	0.396138	-0.351659	0.725094	0.999992	gst-17	II	13628017	13628774	-1
WBGene00001766	61.1521	-0.0740809	0.31586	-0.234537	0.814568	0.999992	gst-18	II	13629799	13630887	-1
WBGene00001767	6.25719	-0.255493	1.96669	-0.12991	0.896637	0.999992	gst-19	II	13625544	13627141	-1
WBGene00001768	1501.41	0.0232026	0.132827	0.174683	0.861329	0.999992	gst-20	II	13608154	13609824	-1
WBGene00001769	71.2583	0.217188	0.326851	0.664485	0.50638	0.999992	gst-21	V	1730759	1732000	-1
WBGene00001770	560.221	-0.064109	0.306009	-0.2095	0.834058	0.999992	gst-22	V	16231032	16232317	-1
WBGene00001771	37.0284	0.0783458	0.457284	0.171328	0.863966	0.999992	gst-23	V	3243287	3244495	1
WBGene00001772	422.715	0.00552997	0.326041	0.016961	0.986468	0.999992	gst-24	II	13610443	13611349	-1
WBGene00001773	10.2149	0.114691	0.793542	0.144531	0.885081	0.999992	gst-25	I	1451122	1453077	-1
WBGene00001774	3257.5	-0.0488301	0.131779	-0.370546	0.710976	0.999992	gst-26	II	15163808	15164646	-1
WBGene00001775	4488.86	-0.0579948	0.121049	-0.479101	0.631867	0.999992	gst-27	II	15164890	15165731	-1
WBGene00001776	1020.76	0.104833	0.138827	0.755132	0.45017	0.999992	gst-28	II	15166194	15167406	-1
WBGene00001777	51.3349	0.127699	0.415259	0.307517	0.75845	0.999992	gst-29	II	15168538	15169860	-1
WBGene00001778	159.096	-0.169027	0.281982	-0.599427	0.548888	0.999992	gst-30	II	4933883	4935038	-1
WBGene00001779	36.3464	0.184947	0.454162	0.407226	0.683842	0.999992	gst-31	II	15174271	15174965	-1
WBGene00001780	36.8809	0.261028	0.578196	0.451452	0.651664	0.999992	gst-32	II	15177372	15178594	-1
WBGene00001781	108.799	-0.219221	0.414792	-0.528509	0.597146	0.999992	gst-33	V	3467453	3468545	-1
WBGene00001782	20.7673	-0.282618	0.581604	-0.48593	0.627017	0.999992	gst-34	II	15179971	15183232	-1
WBGene00001783	85.5864	0.014284	0.273097	0.0523038	0.958287	0.999992	gst-35	II	15183801	15185385	-1
WBGene00001784	3893.39	-0.0146154	0.161789	-0.0903358	0.92802	0.999992	gst-36	X	9861646	9862960	-1
WBGene00001785	7.45144	-0.388312	2.65884	-0.146046	0.883885	0.999992	gst-37	V	1921621	1922381	1
WBGene00001786	114.563	0.0856075	0.335788	0.254945	0.798765	0.999992	gst-38	V	15915216	15916079	-1
WBGene00001787	714.659	0.0164788	0.229058	0.0719413	0.942649	0.999992	gst-39	II	15171163	15171912	-1
WBGene00001788	73.5444	-0.387176	0.443688	-0.872631	0.382864	0.999992	gst-40	IV	760610	762342	1
WBGene00001789	279.202	0.0472289	0.170109	0.277639	0.781289	0.999992	gst-41	V	7398390	7399302	-1
WBGene00001790	2195.74	0.0272816	0.158932	0.171655	0.863709	0.999992	gst-42	X	11726271	11727936	-1
WBGene00001791	726.509	0.0524307	0.122261	0.428843	0.668038	0.999992	gst-43	I	2901325	2903006	1
WBGene00001792	293.493	0.0166544	0.194865	0.0854667	0.93189	0.999992	gst-44	V	16390891	16392406	1
WBGene00001793	21873.2	-0.0358629	0.0786461	-0.456004	0.648387	0.999992	gsy-1	II	12866448	12878116	-1
WBGene00001794	30993.9	-0.046223	0.126055	-0.36669	0.71385	0.999992	gta-1	IV	10180660	10183939	1
WBGene00001795	4517.01	0.0605702	0.127116	0.476494	0.633722	0.999992	gtl-1	IV	11248884	11259535	-1
WBGene00001796	410.918	-0.00296199	0.177258	-0.0167101	0.986668	0.999992	gtl-2	IV	11273483	11281924	1
WBGene00001803	243.472	-0.035725	0.173994	-0.205323	0.837319	0.999992	lite-1	X	6226131	6230701	-1
WBGene00001804	3.55221	1.20897	2.74349	0.440671	0.659451	0.999992	gur-3	X	10402526	10406303	-1
WBGene00001805	168.167	0.0644898	0.220953	0.291872	0.770385	0.999992	gur-4	II	14104773	14108072	1
WBGene00001806	60.968	0.211827	0.4377	0.483956	0.628417	0.999992	gur-5	II	5285329	5288908	1
WBGene00001808	3033.41	-0.0719328	0.101521	-0.708549	0.478604	0.999992	gut-2	V	13497690	13498819	1
WBGene00001811	983.755	0.0356271	0.118256	0.30127	0.763209	0.999992	haf-1	IV	17376427	17379317	1
WBGene00001812	11736.3	-0.0123159	0.121211	-0.101607	0.919069	0.999992	haf-2	II	7353576	7356426	-1
WBGene00001813	10469.4	-0.0257925	0.0632242	-0.407952	0.683309	0.999992	haf-3	V	15760426	15766172	-1
WBGene00001814	4211.94	-0.0310869	0.143612	-0.216464	0.828626	0.999992	haf-4	I	489969	496150	1
WBGene00001815	9623.32	0.0119103	0.0556087	0.21418	0.830407	0.999992	hmt-1	III	11091548	11099964	-1
WBGene00001816	4951.92	-0.0738939	0.0928291	-0.796021	0.42602	0.999992	haf-6	I	1162880	1175868	-1
WBGene00001817	1578.85	0.0341443	0.0784476	0.43525	0.663381	0.999992	haf-7	V	14773258	14777697	1
WBGene00001819	5061.58	0.0489064	0.129991	0.376229	0.706747	0.999992	haf-9	I	6081782	6085962	1
WBGene00001820	974.833	-0.0506509	0.142243	-0.356087	0.721776	0.999992	ham-1	IV	12542034	12545729	1
WBGene00001821	622.384	0.0912755	0.188494	0.484235	0.628219	0.999992	ham-2	X	4554691	4559404	1
WBGene00001823	2545.82	-0.0513067	0.0735249	-0.697814	0.485293	0.999992	hap-1	III	5263943	5264996	1
WBGene00001824	2855.41	0.101533	0.217559	0.46669	0.640721	0.999992	hbl-1	X	5822277	5827755	1
WBGene00001827	29327.9	0.0119955	0.0554689	0.216255	0.828789	0.999992	hcf-1	IV	7770770	7774275	-1
WBGene00001828	703.379	0.013909	0.209345	0.0664404	0.947027	0.999992	hch-1	X	14696412	14699977	-1
WBGene00001829	48641.4	-0.078096	0.0786968	-0.992366	0.321019	0.999992	hcp-1	V	6594194	6599208	1
WBGene00001830	25784.7	-0.0549772	0.0630423	-0.872068	0.383171	0.999992	hcp-2	V	9645746	9650297	1
WBGene00001831	10200.4	-0.028941	0.0628758	-0.460288	0.645309	0.999992	hcp-3	III	9615306	9616470	-1
WBGene00001832	20137.3	-0.0979922	0.105341	-0.93024	0.352247	0.999992	hcp-4	I	3862775	3865938	-1
WBGene00001833	17523	-0.0393045	0.0693221	-0.566984	0.570725	0.999992	hcp-6	I	5165152	5171313	1
WBGene00001834	29511.8	-0.0324273	0.0686853	-0.472113	0.636846	0.999992	hda-1	V	14525389	14527411	1
WBGene00001835	5462.34	0.0395568	0.111639	0.354329	0.723093	0.999992	hda-2	II	8020780	8022561	-1
WBGene00001836	17587.7	-0.014828	0.0607374	-0.244132	0.807128	0.999992	hda-3	I	11912791	11917719	-1
WBGene00001837	3872.07	0.0546628	0.0749482	0.729342	0.465793	0.999992	hda-4	X	16729559	16744698	1
WBGene00001838	3858.66	-0.0162229	0.081128	-0.199966	0.841507	0.999992	hda-10	II	13882705	13888031	1
WBGene00001839	306.995	0.0951543	0.483582	0.19677	0.844008	0.999992	hdl-1	IV	11946106	11949817	-1
WBGene00001840	74818.5	-0.0188086	0.0536061	-0.350866	0.725689	0.999992	hel-1	II	8326852	8328870	-1
WBGene00001841	46.7544	-0.299518	0.616106	-0.486146	0.626864	0.999992	hen-1	X	7116205	7116996	-1
WBGene00001842	34.038	-0.402615	0.492815	-0.81697	0.413946	0.999992	her-1	V	9697129	9701552	1
WBGene00001843	8300.21	-0.00157912	0.0867249	-0.0182084	0.985473	0.999992	hgo-1	I	9049460	9055457	-1
WBGene00001844	2678.3	0.0199319	0.0810006	0.246071	0.805627	0.999992	hid-1	X	2489044	2494339	1
WBGene00001851	18765.2	-0.0161365	0.0809613	-0.199311	0.842019	0.999992	hif-1	V	20780413	20785259	1
WBGene00001852	391.808	-0.106568	0.226467	-0.470567	0.63795	0.999992	hil-1	V	14949777	14952796	1
WBGene00001853	10575.8	-0.0906791	0.111358	-0.814305	0.41547	0.999992	hil-2	IV	6294234	6295219	1
WBGene00001854	2825.86	-0.0799271	0.10051	-0.795215	0.426489	0.999992	hil-3	X	8159153	8160084	1
WBGene00001855	28694.3	-0.0492696	0.10489	-0.469725	0.638552	0.999992	hil-4	V	4754313	4755469	1
WBGene00001856	24976.5	-0.0156723	0.0964172	-0.162547	0.870875	0.999992	hil-5	I	5774585	5775610	1
WBGene00001857	43.1597	0.255847	0.462086	0.55368	0.579798	0.999992	hil-6	V	2030619	2031475	-1
WBGene00001858	1044.27	-0.0796507	0.374136	-0.212892	0.831411	0.999992	hil-7	IV	6646034	6646936	1
WBGene00001859	208.492	0.0118481	0.355976	0.0332833	0.973449	0.999992	hil-8	I	5463480	5469627	-1
WBGene00001860	34795.9	-0.0455509	0.0601094	-0.7578	0.448571	0.999992	him-1	I	4951570	4957667	-1
WBGene00001862	10234.6	-0.0611047	0.083492	-0.731863	0.464252	0.999992	him-3	IV	6977517	6978943	1
WBGene00001863	8971.28	-0.0205235	0.136694	-0.150141	0.880653	0.999992	him-4	X	9717589	9753764	1
WBGene00001864	1542.64	0.0611325	0.117845	0.518755	0.603932	0.999992	him-5	V	14090719	14092435	1
WBGene00001865	8477.6	-0.0363372	0.0928208	-0.391477	0.695445	0.999992	him-6	IV	12490791	12495298	1
WBGene00001867	4946.59	0.0203209	0.128478	0.158167	0.874325	0.999992	him-8	IV	10561905	10563947	1
WBGene00001869	12158.9	-0.00974808	0.0500306	-0.194842	0.845516	0.999992	him-10	III	5803260	5805112	1
WBGene00001872	4972.27	0.0373465	0.106789	0.349724	0.726546	0.999992	him-14	II	7065020	7069966	-1
WBGene00001874	22004.6	-0.0130178	0.0606475	-0.214647	0.830042	0.999992	him-17	V	13176711	13180189	1
WBGene00001875	12.8333	0.346943	0.970754	0.357395	0.720796	0.999992	his-1	V	16042486	16043013	1
WBGene00001876	30.0693	0.381209	0.666058	0.572337	0.567094	0.999992	his-2	V	16041828	16042283	-1
WBGene00001877	64.297	0.0323175	0.452636	0.0713984	0.943081	0.999992	his-3	V	16040771	16041288	1
WBGene00001878	37.2586	0.0095254	0.543764	0.0175175	0.986024	0.999992	his-4	V	16040029	16040548	-1
WBGene00001879	35.2625	0.19143	0.443078	0.432045	0.665709	0.999992	his-5	V	8535177	8535662	1
WBGene00001880	137.121	-0.0309061	0.386471	-0.0799701	0.936261	0.999992	his-6	V	8534387	8534977	-1
WBGene00001881	59.4871	-0.339279	0.512723	-0.66172	0.508151	0.999992	his-7	V	8533379	8533869	1
WBGene00001882	63.964	0.172651	0.433396	0.398367	0.69036	0.999992	his-8	V	8532540	8533098	-1
WBGene00001883	93.6573	0.0318173	0.282659	0.112565	0.910376	0.999992	his-9	II	13823648	13824058	1
WBGene00001884	38.7984	-0.0489547	0.474284	-0.103218	0.91779	0.999992	his-10	II	13823064	13823375	-1
WBGene00001885	92.3023	0.107356	0.326872	0.328433	0.742585	0.999992	his-11	II	13821778	13822333	1
WBGene00001886	59.6061	0.25058	0.453176	0.552941	0.580304	0.999992	his-12	II	13821198	13821581	-1
WBGene00001887	75.3556	0.00270772	0.372665	0.00726583	0.994203	0.999992	his-13	II	13820210	13820620	1
WBGene00001888	37.7737	0.0316841	0.577393	0.0548744	0.956239	0.999992	his-14	II	13819626	13819937	-1
WBGene00001889	89.5078	0.106596	0.332732	0.320367	0.74869	0.999992	his-15	II	13818371	13818739	1
WBGene00001890	53.0184	0.338617	0.509652	0.664408	0.506429	0.999992	his-16	II	13817759	13818143	-1
WBGene00001891	43.0991	0.016495	0.506708	0.0325533	0.974031	0.999992	his-17	V	8897458	8897992	-1
WBGene00001892	31.1764	0.130988	0.459244	0.285226	0.775471	0.999992	his-18	V	8898195	8898645	1
WBGene00001893	64.9644	0.0991096	0.349463	0.283605	0.776713	0.999992	his-19	V	8895765	8896148	1
WBGene00001894	29.4365	0.20603	0.496158	0.415251	0.677958	0.999992	his-20	V	8895101	8895472	-1
WBGene00001895	59.2409	0.189217	0.384375	0.49227	0.622528	0.999992	his-21	V	8891883	8892266	-1
WBGene00001896	32.2302	0.200271	0.482987	0.414651	0.678397	0.999992	his-22	V	8892559	8892930	1
WBGene00001898	12907.7	-0.0618047	0.0826432	-0.74785	0.45455	0.999992	his-24	X	14490094	14491115	1
WBGene00001899	61.128	0.0578337	0.402961	0.143522	0.885878	0.999992	his-25	II	13824686	13825294	-1
WBGene00001900	19.2168	0.0793216	0.686074	0.115617	0.907956	0.999992	his-26	II	13825532	13825843	1
WBGene00001901	37.7921	0.0206071	0.434946	0.0473786	0.962212	0.999992	his-27	V	8890038	8890448	1
WBGene00001902	16.9146	0.43227	0.671403	0.643831	0.519685	0.999992	his-28	V	8889488	8889799	-1
WBGene00001903	18.6954	0.0463026	0.556836	0.0831531	0.93373	0.999992	his-29	IV	8331044	8331412	-1
WBGene00001904	8.24546	0.263607	0.949476	0.277634	0.781293	0.999992	his-30	IV	8331666	8332049	1
WBGene00001905	44.9675	0.357026	0.4758	0.750369	0.453032	0.999992	his-31	IV	8333557	8334021	-1
WBGene00001906	331.58	0.0950507	0.211306	0.449824	0.652837	0.999992	his-32	IV	8334298	8334862	1
WBGene00001907	8.24546	0.263607	0.949476	0.277634	0.781293	0.999992	his-33	IV	8335335	8335718	-1
WBGene00001908	18.6954	0.0463026	0.556836	0.0831531	0.93373	0.999992	his-34	IV	8335972	8336340	1
WBGene00001909	3829.34	0.352807	0.314783	1.12079	0.262377	0.999992	his-35	V	9544611	9545398	-1
WBGene00001910	2571.11	-0.0635664	0.125573	-0.506209	0.61271	0.999992	C50F4.6	V	9546092	9546838	1
WBGene00001911	3491.04	0.059255	0.12305	0.481552	0.630125	0.999992	his-37	V	9547083	9547607	1
WBGene00001912	169.169	-0.0370892	0.276913	-0.133938	0.893452	0.999992	his-38	X	7309413	7309908	-1
WBGene00001914	162.624	0.0266335	0.262563	0.101437	0.919204	0.999992	his-40	X	7310110	7310698	1
WBGene00001915	3476.61	0.154763	0.178156	0.868696	0.385013	0.999992	his-41	V	9545494	9546264	1
WBGene00001916	20.7899	0.171531	0.6439	0.266394	0.789936	0.999992	his-42	II	13828287	13828697	-1
WBGene00001917	38.9854	0.281802	0.543129	0.518849	0.603866	0.999992	his-43	II	13827326	13827709	1
WBGene00001918	54.3299	0.11326	0.373349	0.303364	0.761613	0.999992	his-44	II	13826730	13827098	-1
WBGene00001919	141.049	0.0297506	0.251165	0.11845	0.905711	0.999992	his-45	IV	11326557	11327090	1
WBGene00001920	89.9525	0.0807054	0.380914	0.211873	0.832206	0.999992	his-46	IV	11326018	11326329	-1
WBGene00001921	188.078	0.114975	0.20228	0.568398	0.569765	0.999992	his-47	IV	11323885	11324470	-1
WBGene00001922	273.392	0.141613	0.185962	0.761514	0.44635	0.999992	his-48	IV	11324719	11325222	1
WBGene00001923	36.7154	0.021373	0.421781	0.0506732	0.959586	0.999992	his-49	V	8847943	8848353	1
WBGene00001924	16.9146	0.43227	0.671403	0.643831	0.519685	0.999992	his-50	V	8847393	8847704	-1
WBGene00001925	58.7265	0.183148	0.390206	0.469363	0.63881	0.999992	his-51	V	8849788	8850171	-1
WBGene00001926	32.2302	0.200271	0.482987	0.414651	0.678397	0.999992	his-52	V	8850464	8850835	1
WBGene00001927	62.1788	0.142926	0.358518	0.39866	0.690144	0.999992	his-53	V	8853670	8854053	1
WBGene00001928	31.8705	0.203209	0.501718	0.405026	0.685459	0.999992	his-54	V	8853006	8853377	-1
WBGene00001929	140.866	0.0458663	0.247109	0.185611	0.85275	0.999992	his-55	IV	11337733	11338295	-1
WBGene00001930	93.0946	0.0924221	0.372754	0.247944	0.804177	0.999992	his-56	IV	11338522	11338833	1
WBGene00001931	291.584	0.23436	0.266109	0.880695	0.378483	0.999992	his-57	IV	11340412	11341703	1
WBGene00001932	261.558	-0.000533228	0.161476	-0.00330222	0.997365	0.999992	his-58	IV	11339630	11340132	-1
WBGene00001933	193.301	0.133977	0.252045	0.53156	0.595031	0.999992	his-59	IV	7488216	7488956	1
WBGene00001934	273.134	0.107409	0.233964	0.459084	0.646173	0.999992	his-60	IV	7487560	7488025	-1
WBGene00001935	278.724	0.0780671	0.160118	0.48756	0.625862	0.999992	his-61	IV	7485733	7486254	-1
WBGene00001936	200.924	0.220773	0.30555	0.722543	0.469961	0.999992	his-62	IV	7486519	7486962	1
WBGene00001937	116.005	0.158396	0.326095	0.485737	0.627154	0.999992	his-63	IV	11406365	11406893	-1
WBGene00001938	59.7679	0.376407	0.441194	0.853154	0.393574	0.999992	his-64	IV	11407084	11407496	1
WBGene00001939	197.108	0.0941843	0.189616	0.49671	0.619394	0.999992	his-65	IV	11401059	11401564	1
WBGene00001940	261.753	0.0297037	0.167451	0.177388	0.859204	0.999992	his-66	IV	11400311	11400812	-1
WBGene00001941	171.559	0.0410524	0.215765	0.190265	0.849102	0.999992	his-67	I	9988341	9988826	-1
WBGene00001942	1534.15	0.049744	0.111526	0.44603	0.655576	0.999992	his-68	I	9989061	9989617	1
WBGene00001943	8.70366	0.462159	1.21015	0.381902	0.702534	0.999992	his-69	III	4058272	4058743	-1
WBGene00001944	85.3342	0.191975	0.605631	0.316984	0.751256	0.999992	his-70	III	4059647	4060172	-1
WBGene00001945	1907.99	-0.041645	0.183261	-0.227245	0.820233	0.999992	his-71	X	7981382	7982070	-1
WBGene00001946	18499.8	-0.0313261	0.0497554	-0.629603	0.528954	0.999992	his-72	III	12367474	12369050	-1
WBGene00001947	40.8393	0.130263	0.669792	0.194483	0.845797	0.999992	his-73	II	13183450	13183845	1
WBGene00001948	403.101	0.0529015	0.168061	0.314775	0.752932	0.999992	hlh-1	II	4518560	4522523	1
WBGene00001949	3451.97	0.0431173	0.107522	0.401009	0.688414	0.999992	hlh-2	I	7190834	7193924	-1
WBGene00001950	358.542	-0.0659386	0.17366	-0.3797	0.704168	0.999992	hlh-3	II	9086608	9087917	1
WBGene00001951	29.8153	-0.0324015	1.04769	-0.0309266	0.975328	0.999992	hlh-4	III	9737469	9738839	-1
WBGene00001952	41.6677	0.0699005	0.575995	0.121356	0.903409	0.999992	hlh-6	II	9613463	9614812	-1
WBGene00001953	34.8432	0.165054	0.542935	0.304004	0.761125	0.999992	hlh-8	X	8116636	8120133	1
WBGene00001954	18.1266	-0.326435	0.908072	-0.359482	0.719235	0.999992	hlh-10	V	9280702	9282154	-1
WBGene00001955	4986.54	0.0141359	0.0505398	0.279697	0.77971	0.999992	hlh-11	III	9619711	9626537	1
WBGene00001956	34.8477	-0.000102391	0.424788	-0.000241041	0.999808	0.999992	hlh-12	IV	8478577	8479446	-1
WBGene00001957	9.01126	-0.228637	0.880496	-0.259669	0.795119	0.999992	hlh-13	X	4249249	4250764	1
WBGene00001958	178.525	0.073821	0.440853	0.16745	0.867016	0.999992	hlh-14	II	5737790	5738888	-1
WBGene00001959	4.2796	0.954918	2.04684	0.466532	0.640835	0.999992	hlh-15	X	2412953	2413377	-1
WBGene00001960	121.522	0.00547788	0.221505	0.0247303	0.98027	0.999992	hlh-16	I	8767019	8768042	-1
WBGene00001961	15.7249	-0.0862851	0.751585	-0.114804	0.9086	0.999992	hlh-17	IV	16254764	16256274	1
WBGene00001962	6.25237	-0.229584	2.72059	-0.0843874	0.932748	0.999992	hlh-19	X	555788	557191	-1
WBGene00001963	164.99	-0.121171	0.214619	-0.564585	0.572356	0.999992	btb-1	III	185652	186922	1
WBGene00001964	27.0131	0.297181	0.503167	0.590622	0.554774	0.999992	hlh-25	II	5535240	5536149	1
WBGene00001965	6.01617	1.07464	2.00204	0.536771	0.591426	0.999992	hlh-26	II	5532857	5533738	-1
WBGene00001966	24.7383	-0.230639	0.820317	-0.281158	0.778589	0.999992	hlh-27	II	5539081	5540211	-1
WBGene00001967	2.26162	-1.11707	2.92059	-0.382481	0.702105	0.999992	hlh-28	X	17551057	17551877	1
WBGene00001968	9.43188	0.0159831	0.765118	0.0208897	0.983334	0.999992	hlh-29	X	17547817	17548637	-1
WBGene00001971	40731.1	-0.0445758	0.0748676	-0.595395	0.55158	0.999992	hmg-1.1	II	14250683	14251448	1
WBGene00001972	6998.3	0.00434003	0.088768	0.0488918	0.961006	0.999992	hmg-1.2	III	6280380	6282411	1
WBGene00001973	19937.8	-0.0158116	0.0635208	-0.24892	0.803422	0.999992	hmg-3	I	5815609	5818132	-1
WBGene00001974	15547.2	-0.0203773	0.0766552	-0.26583	0.79037	0.999992	hmg-4	III	7379143	7381609	-1
WBGene00001975	6999.57	-0.0195663	0.0449419	-0.435367	0.663296	0.999992	hmg-5	IV	7644895	7646219	-1
WBGene00001976	3308.63	-0.0509756	0.0818584	-0.622729	0.533463	0.999992	hmg-11	II	4672798	4673746	1
WBGene00001977	27034.3	-0.0559946	0.121666	-0.460234	0.645348	0.999992	hmg-12	II	11916513	11917643	1
WBGene00001978	16722.5	0.046224	0.113367	0.407738	0.683466	0.999992	hmp-1	V	11845877	11852165	1
WBGene00001979	17091.2	-0.0377867	0.0677877	-0.557427	0.577236	0.999992	hmp-2	I	14738882	14742657	1
WBGene00001980	26106	-0.0201663	0.0724921	-0.278186	0.780869	0.999992	hmr-1	I	11075758	11134667	-1
WBGene00001981	279.173	-0.0239935	0.254748	-0.0941855	0.924962	0.999992	hnd-1	X	11684661	11685778	1
WBGene00001983	22995.8	-0.0164964	0.0425619	-0.387585	0.698323	0.999992	hoe-1	IV	4739490	4744269	-1
WBGene00001984	86.8176	0.0294611	0.258268	0.114072	0.909181	0.999992	hog-1	X	5851954	5854260	-1
WBGene00001985	3602.41	0.088713	0.168674	0.525944	0.598927	0.999992	hop-1	I	4208515	4210341	-1
WBGene00001986	394.521	-0.00371246	0.155286	-0.0239071	0.980927	0.999992	hot-1	V	14621135	14629384	1
WBGene00001987	77.3842	-0.158642	0.488936	-0.324464	0.745587	0.999992	hot-2	V	19174806	19187899	1
WBGene00001988	59.4154	-0.220203	0.541137	-0.406926	0.684062	0.999992	hot-3	II	13930648	13931997	-1
WBGene00001989	73.3514	0.390451	0.40245	0.970184	0.331955	0.999992	hot-4	III	6220537	6224451	1
WBGene00001990	40.6254	0.418664	0.480584	0.871158	0.383668	0.999992	hot-5	I	8683220	8687217	-1
WBGene00001991	213.986	0.0790491	0.33548	0.23563	0.81372	0.999992	hot-6	V	11021069	11022884	-1
WBGene00001992	48.0131	0.0661805	0.617102	0.107244	0.914595	0.999992	hot-7	II	14211439	14213123	1
WBGene00001993	16436.9	-0.000975973	0.0933384	-0.0104563	0.991657	0.999992	hpd-1	III	10535526	10537682	1
WBGene00001994	6678.67	0.0390727	0.0579579	0.674156	0.500212	0.999992	hpk-1	X	4210573	4217290	-1
WBGene00001995	515.32	-0.0696884	0.145801	-0.47797	0.632671	0.999992	hpl-1	X	13245390	13247044	1
WBGene00001996	8650.31	-0.0518204	0.0972066	-0.533095	0.593968	0.999992	hpl-2	III	10752254	10755523	-1
WBGene00001997	3481.31	-0.042126	0.10698	-0.393775	0.693747	0.999992	hpr-9	III	10621541	10626398	1
WBGene00001998	6378.34	-0.00247147	0.0561446	-0.0440197	0.964889	0.999992	hpr-17	II	13153461	13157093	-1
WBGene00001999	43695.8	-0.213845	0.175021	-1.22183	0.221772	0.999992	hrp-1	IV	3336927	3338867	-1
WBGene00002000	65712.9	0.000495716	0.0463491	0.0106953	0.991467	0.999992	hrp-2	I	12060271	12064897	-1
WBGene00002001	16695.1	-0.0258917	0.0483087	-0.535965	0.591983	0.999992	hars-1	IV	10858957	10861295	1
WBGene00002002	5310.1	0.0555832	0.0821328	0.676748	0.498566	0.999992	hsb-1	IV	12565983	12567226	-1
WBGene00002003	8107.97	0.00833135	0.112371	0.0741416	0.940898	0.999992	hse-5	III	4345339	4350079	1
WBGene00002004	12465.5	-0.0298353	0.109568	-0.2723	0.785392	0.999992	hsf-1	I	11953512	11961984	-1
WBGene00002005	424497	-0.0459591	0.0678955	-0.67691	0.498463	0.999992	hsp-1	IV	17278959	17281330	1
WBGene00002006	57.2859	0.0235677	0.363085	0.0649096	0.948246	0.999992	hsp-2	X	3293290	3294369	1
WBGene00002007	77886.6	0.00198869	0.0337991	0.0588384	0.953081	0.999992	hsp-3	X	6089033	6092124	-1
WBGene00002008	57205.8	-0.0614529	0.0619699	-0.991658	0.321365	0.999992	hsp-4	II	7350121	7352636	-1
WBGene00002010	134422	-0.0481092	0.0734919	-0.654619	0.512713	0.999992	hsp-6	V	4824130	4826760	-1
WBGene00002011	3157.2	0.0523218	0.201836	0.25923	0.795458	0.999992	hsp-12.2	III	8138090	8139645	1
WBGene00002012	606.004	-0.0387484	0.155003	-0.249985	0.802599	0.999992	hsp-12.3	IV	9444791	9445507	-1
WBGene00002013	49.9846	-0.0818002	0.415888	-0.196688	0.844072	0.999992	hsp-12.6	IV	9446385	9446884	-1
WBGene00002015	1878.2	0.164143	0.168605	0.973539	0.330286	0.999992	hsp-16.1	V	9087293	9087782	-1
WBGene00002016	75.3038	0.376271	0.531691	0.707688	0.479139	0.999992	hsp-16.2	V	1804334	1804971	-1
WBGene00002017	1940.94	0.164058	0.148062	1.10804	0.267846	0.999992	hsp-16.11	V	9090077	9090604	1
WBGene00002018	95.6199	0.452801	0.447594	1.01163	0.311713	0.999992	hsp-16.41	V	1805178	1805875	1
WBGene00002019	1089.22	1.07339	1.01872	1.05367	0.292036	0.999992	hsp-16.48	V	9088131	9088617	1
WBGene00002020	1089.72	1.07397	1.01734	1.05567	0.291119	0.999992	hsp-16.49	V	9089280	9089766	-1
WBGene00002021	1827.92	0.0131237	0.209504	0.0626417	0.950052	0.999992	hsp-17	V	8384774	8386268	-1
WBGene00002023	8623.27	-0.04508	0.238046	-0.189375	0.849799	0.999992	hsp-25	X	6034463	6039496	-1
WBGene00002024	9873.36	-0.0263595	0.0536143	-0.491651	0.622966	0.999992	hsp-43	X	6233149	6235541	-1
WBGene00002025	58005.5	-0.0712482	0.127729	-0.557807	0.576976	0.999992	hsp-60	III	1619742	1625797	1
WBGene00002026	414.938	0.136776	0.472384	0.289545	0.772164	0.999992	hsp-70	I	9320325	9322534	-1
WBGene00002027	55444.6	-0.0206613	0.0496838	-0.415855	0.677516	0.999992	hsr-9	I	9626241	9630848	1
WBGene00002028	6465.79	0.0162904	0.149004	0.109329	0.912942	0.999992	hst-1	IV	8688273	8691513	-1
WBGene00002029	1162.16	0.0162763	0.107593	0.151276	0.879758	0.999992	hst-2	X	11204117	11207155	-1
WBGene00002030	63.5418	0.0301713	0.508101	0.0593804	0.952649	0.999992	hst-3.1	II	6165721	6169231	-1
WBGene00002031	1324.5	0.00996113	0.146888	0.0678143	0.945933	0.999992	hst-6	X	5275567	5278813	1
WBGene00002032	10490.9	-0.0869968	0.104885	-0.829452	0.406848	0.999992	htp-1	IV	5390184	5391557	-1
WBGene00002033	6748.19	-0.0619299	0.0650007	-0.952756	0.340714	0.999992	htp-2	IV	6419500	6420898	1
WBGene00002034	13755	-0.0384219	0.0858533	-0.447529	0.654493	0.999992	htp-3	I	4827072	4829794	1
WBGene00002035	13202.2	-0.0127303	0.120504	-0.105642	0.915866	0.999992	hum-1	I	8845809	8851116	-1
WBGene00002036	25490.5	-0.0289286	0.0712586	-0.405966	0.684767	0.999992	hum-2	V	9386179	9400062	1
WBGene00002037	4528.78	-0.025385	0.0594772	-0.426802	0.669524	0.999992	hum-4	X	11420474	11433524	-1
WBGene00002038	6837.8	-0.0442179	0.0611674	-0.7229	0.469742	0.999992	hum-5	III	4029115	4036840	-1
WBGene00002039	1869.68	-0.0454069	0.139387	-0.32576	0.744606	0.999992	hum-6	X	2303082	2314914	1
WBGene00002040	2425.14	-0.00551207	0.154223	-0.035741	0.971489	0.999992	hum-7	I	585831	607601	-1
WBGene00002041	3891.89	-0.069209	0.113305	-0.610818	0.54132	0.999992	hum-8	IV	429214	440554	-1
WBGene00002042	2326.25	0.0660954	0.22372	0.295438	0.767659	0.999992	hus-1	I	3698102	3699300	1
WBGene00002043	5938.09	-0.00299325	0.119146	-0.0251225	0.979957	0.999992	hyl-1	IV	8539123	8544403	1
WBGene00002044	5592.74	-0.0182387	0.0656643	-0.277757	0.781199	0.999992	hyl-2	X	4696952	4699461	-1
WBGene00002045	117255	0.0438516	0.0768685	0.570476	0.568355	0.999992	icd-1	II	6587577	6588679	-1
WBGene00002046	6039.93	-0.0101354	0.0599047	-0.169192	0.865645	0.999992	icln-1	IV	9094541	9095653	-1
WBGene00002047	14528.1	-0.052211	0.0967717	-0.539527	0.589523	0.999992	icp-1	I	2304512	2306816	-1
WBGene00002048	3364.61	-0.0477158	0.0852468	-0.559737	0.575659	0.999992	ida-1	III	5755496	5765815	1
WBGene00002050	5583.83	0.0444945	0.160736	0.276818	0.78192	0.999992	ifa-1	X	11271184	11275482	1
WBGene00002051	406.508	0.0336506	0.335997	0.100151	0.920224	0.999992	ifa-3	X	16267257	16270056	-1
WBGene00002052	4434.37	-0.00744821	0.150333	-0.0495448	0.960485	0.999992	ifa-4	X	4912308	4915979	-1
WBGene00002053	15653.3	-0.00393747	0.143004	-0.0275339	0.978034	0.999992	ifb-1	II	5765618	5772084	1
WBGene00002054	14531.9	-0.0243939	0.113334	-0.21524	0.82958	0.999992	ifb-2	II	5750190	5754140	1
WBGene00002055	4519.49	-0.195731	0.278309	-0.703288	0.481876	0.999992	ifc-1	V	2881393	2883753	1
WBGene00002056	15056	0.0178893	0.0987599	0.181139	0.856258	0.999992	ifc-2	X	642156	654903	-1
WBGene00002057	1251.05	-0.105032	0.124048	-0.84671	0.397157	0.999992	ifd-1	X	8820703	8824448	-1
WBGene00002058	2121.53	-0.0448664	0.231598	-0.193725	0.846391	0.999992	ifd-2	X	813852	815929	-1
WBGene00002059	23657.1	-0.0351455	0.106836	-0.328968	0.74218	0.999992	ife-1	III	13343574	13344616	1
WBGene00002060	3361.32	-0.0405702	0.121141	-0.334902	0.737699	0.999992	ife-2	X	381338	382709	-1
WBGene00002061	42292.3	-0.0391126	0.0619922	-0.630927	0.528088	0.999992	ife-3	V	6588	7822	-1
WBGene00002062	792.236	-0.0141194	0.128495	-0.109882	0.912503	0.999992	ife-4	X	1104212	1106247	1
WBGene00002063	2112.02	-0.0574966	0.13094	-0.439107	0.660584	0.999992	ife-5	II	12280662	12284133	1
WBGene00002064	100765	-0.0562705	0.0960574	-0.585801	0.55801	0.999992	iff-1	III	9745864	9747193	-1
WBGene00002065	14011.1	-0.0464706	0.611347	-0.0760135	0.939408	0.999992	iff-2	II	8559394	8561352	-1
WBGene00002066	65326	0.0065159	0.0860117	0.0757559	0.939613	0.999992	ifg-1	II	8217231	8222395	1
WBGene00002067	1324.22	-0.0363442	0.248017	-0.146539	0.883496	0.999992	ifp-1	X	9675844	9680169	-1
WBGene00002068	15525	-0.34451	0.45342	-0.759803	0.447373	0.999992	ify-1	II	5054084	5055338	-1
WBGene00002069	528.246	-0.0945169	0.13794	-0.685205	0.493215	0.999992	ikb-1	I	9685398	9688653	1
WBGene00002070	21533.6	0.00318979	0.0916881	0.0347896	0.972248	0.999992	ile-1	I	9609501	9611620	-1
WBGene00002071	4683.31	0.00204839	0.0668924	0.0306222	0.975571	0.999992	ile-2	X	768596	770776	1
WBGene00002072	14888.1	0.0273561	0.159006	0.172044	0.863403	0.999992	ima-1	V	11239675	11241780	1
WBGene00002073	74641.4	-0.0398821	0.0850496	-0.468927	0.639122	0.999992	ima-2	I	6315233	6317267	1
WBGene00002074	44566.7	-0.00501404	0.0548146	-0.0914727	0.927117	0.999992	ima-3	IV	7558726	7561664	-1
WBGene00002075	19917	0.0360791	0.0680678	0.530047	0.59608	0.999992	imb-1	I	4920707	4926233	-1
WBGene00002076	27205.5	-0.0131999	0.0482299	-0.273687	0.784325	0.999992	imb-2	II	14365705	14373899	1
WBGene00002077	96353.5	-0.0535245	0.0704467	-0.759787	0.447382	0.999992	imb-3	I	310981	314989	-1
WBGene00002078	75697.3	-0.00333261	0.0517258	-0.0644283	0.948629	0.999992	xpo-1	V	7805064	7814656	1
WBGene00002079	34779.3	-0.0285637	0.0507983	-0.562297	0.573914	0.999992	xpo-2	I	318390	323352	-1
WBGene00002080	18156.6	0.0623348	0.166253	0.374939	0.707706	0.999992	xpo-3	IV	7916699	7924129	-1
WBGene00002081	5368.33	-0.0524555	0.096758	-0.54213	0.587729	0.999992	ina-1	III	9168040	9172802	-1
WBGene00002083	93025.1	-0.0289899	0.0444139	-0.652722	0.513935	0.999992	inf-1	III	6930039	6931953	1
WBGene00002084	86.2565	0.046626	0.363696	0.128201	0.89799	0.999992	ins-1	IV	10436708	10438410	1
WBGene00002085	60.147	0.234767	0.540429	0.434409	0.663991	0.999992	ins-2	II	5988526	5989394	1
WBGene00002086	90.1278	-0.0290634	0.312011	-0.0931486	0.925785	0.999992	ins-3	II	5990103	5990818	-1
WBGene00002087	87.942	0.277709	0.484135	0.573619	0.566225	0.999992	ins-4	II	5996370	5997007	1
WBGene00002088	50.5082	0.239229	0.380713	0.62837	0.529762	0.999992	ins-5	II	5997803	5999019	1
WBGene00002089	179.755	0.108179	0.197429	0.547939	0.583734	0.999992	ins-6	II	6000421	6001009	1
WBGene00002090	236.589	0.112392	0.512365	0.219359	0.826371	0.999992	ins-7	IV	9682013	9682826	-1
WBGene00002091	7.90616	-0.438836	0.991209	-0.442728	0.657962	0.999992	ins-8	IV	9680387	9680941	-1
WBGene00002092	1.86507	4.33259	3.93021	1.10238	0.270296	0.999992	ins-9	X	8866238	8866640	-1
WBGene00002093	21.9368	0.336041	0.642334	0.523156	0.600866	0.999992	ins-10	V	14033950	14034393	1
WBGene00002094	4.22132	-0.695725	2.73978	-0.253935	0.799546	0.999992	ins-11	II	5556761	5557088	1
WBGene00002095	32.5912	0.688087	0.644393	1.06781	0.285608	0.999992	ins-12	II	5554617	5555306	1
WBGene00002097	13.2192	0.100059	0.775739	0.128986	0.897369	0.999992	ins-14	II	6745435	6745960	-1
WBGene00002100	578.823	-0.128405	0.142714	-0.899735	0.368261	0.999992	ins-17	III	4476888	4477583	-1
WBGene00002101	106.597	-0.0542011	0.249246	-0.21746	0.82785	0.999992	ins-18	I	8147400	8149723	1
WBGene00002102	3.66126	-0.573528	2.14717	-0.267109	0.789385	0.999992	ins-19	II	3126037	3126441	-1
WBGene00002103	1.91892	-0.00139001	3.82052	-0.000363827	0.99971	0.999992	ins-20	II	6010844	6011321	1
WBGene00002105	89.6579	-0.0241846	0.530011	-0.0456304	0.963605	0.999992	ins-22	III	10026289	10026673	1
WBGene00002106	82.7502	0.367335	0.554693	0.662231	0.507823	0.999992	ins-23	III	10028247	10028600	1
WBGene00002107	45.3868	-0.253458	0.582101	-0.43542	0.663258	0.999992	ins-24	I	14031147	14031667	-1
WBGene00002108	5.86104	0.7873	2.64419	0.297748	0.765896	0.999992	ins-25	I	14020364	14021155	1
WBGene00002109	130.94	-0.0427947	0.217904	-0.196392	0.844303	0.999992	ins-26	I	14037151	14037803	-1
WBGene00002110	168.536	0.0557375	0.35494	0.157033	0.875219	0.999992	ins-27	I	14027236	14027588	1
WBGene00002111	127.227	-0.0336946	0.283062	-0.119036	0.905247	0.999992	ins-28	I	14012369	14013629	-1
WBGene00002112	57.1018	0.133525	0.391739	0.340851	0.733216	0.999992	ins-29	I	14018785	14019759	1
WBGene00002113	101.328	-0.118539	0.261356	-0.453554	0.65015	0.999992	ins-30	I	14035096	14036057	-1
WBGene00002114	25.245	0.017891	1.99673	0.00896014	0.992851	0.999992	ins-31	II	3127041	3127790	1
WBGene00002115	4.1641	-0.0521459	2.03575	-0.0256151	0.979564	0.999992	ins-32	II	3802959	3803324	-1
WBGene00002116	77.4783	0.117451	0.568094	0.206746	0.836208	0.999992	ins-33	I	13637845	13639311	-1
WBGene00002117	324.803	-0.164953	0.179492	-0.918999	0.358096	0.999992	ins-34	IV	14106584	14107715	1
WBGene00002118	27.9052	-0.298571	0.492616	-0.606092	0.544454	0.999992	ins-35	V	20375536	20376301	1
WBGene00002120	78.7007	-0.182142	0.740143	-0.24609	0.805613	0.999992	ins-37	II	13835103	13835709	-1
WBGene00002123	825.931	0.0390588	0.140004	0.278984	0.780257	0.999992	inx-1	X	6943740	6956399	-1
WBGene00002124	3486.68	0.0655382	0.141101	0.464478	0.642305	0.999992	inx-2	X	11294962	11296731	-1
WBGene00002125	8294.9	0.0179727	0.112046	0.160404	0.872563	0.999992	inx-3	X	5996156	5998243	1
WBGene00002127	2123.16	-0.0078642	0.0826293	-0.0951744	0.924176	0.999992	inx-5	X	8300030	8302395	-1
WBGene00002128	344.53	0.192593	0.247807	0.777189	0.437048	0.999992	inx-6	IV	12746584	12749721	1
WBGene00002129	1925.56	0.0180731	0.236791	0.0763253	0.93916	0.999992	inx-7	IV	5943981	5946754	-1
WBGene00002130	12670.1	0.0445162	0.1539	0.289254	0.772387	0.999992	inx-8	IV	11673816	11675635	1
WBGene00002131	3035.53	0.10285	0.121464	0.846754	0.397132	0.999992	inx-9	IV	11676354	11678497	1
WBGene00002132	843.285	-0.0160643	0.144204	-0.1114	0.911299	0.999992	inx-10	V	9204703	9207467	-1
WBGene00002133	1368.1	0.0803118	0.155438	0.516679	0.60538	0.999992	inx-11	V	12487266	12493264	1
WBGene00002134	5262.09	-0.0200602	0.093291	-0.215029	0.829745	0.999992	inx-12	I	3755457	3759077	-1
WBGene00002135	5192.25	-0.000673771	0.112391	-0.00599486	0.995217	0.999992	inx-13	I	3748523	3753958	-1
WBGene00002136	15143.6	0.057523	0.154388	0.372587	0.709456	0.999992	inx-14	I	7350312	7352235	-1
WBGene00002137	2938.18	0.0207359	0.0708954	0.292485	0.769916	0.999992	inx-15	I	4159014	4161149	-1
WBGene00002138	3091.63	0.00851471	0.0631707	0.134789	0.892779	0.999992	inx-16	I	4162035	4165015	1
WBGene00002139	1253.78	0.0239367	0.0879777	0.272077	0.785563	0.999992	inx-17	I	4165135	4167229	1
WBGene00002140	209.42	0.0844379	0.272593	0.309758	0.756745	0.999992	inx-18	IV	606355	614021	1
WBGene00002141	81.3464	-0.193084	0.408745	-0.472383	0.636654	0.999992	inx-19	I	2451908	2464637	-1
WBGene00002142	62.4731	0.367802	0.509136	0.722404	0.470046	0.999992	inx-20	I	9874698	9879119	1
WBGene00002143	3993.91	0.00807208	0.120273	0.0671146	0.94649	0.999992	inx-21	I	3611909	3618317	1
WBGene00002144	13781.4	-0.0264256	0.046127	-0.572888	0.566721	0.999992	inx-22	I	3608395	3612301	1
WBGene00002146	1346.82	-0.0211861	0.102301	-0.207095	0.835935	0.999992	ipp-5	X	6031469	6034525	1
WBGene00002147	15750	0.0476975	0.133081	0.358409	0.720038	0.999992	ire-1	II	8112262	8124910	-1
WBGene00002148	19990.3	-0.0178019	0.0979434	-0.181757	0.855774	0.999992	gon-14	V	6606439	6611158	-1
WBGene00002149	94.3976	-0.125716	0.290596	-0.432613	0.665296	0.999992	irk-1	X	6766083	6772946	-1
WBGene00002150	126.668	-0.0150921	0.217923	-0.0692543	0.944787	0.999992	irk-2	X	703029	714478	-1
WBGene00002151	279.141	0.267614	0.261068	1.02507	0.305328	0.999992	irk-3	X	14353309	14370370	-1
WBGene00002152	38513.8	-0.0289676	0.0519792	-0.557291	0.577328	0.999992	iars-1	IV	10368607	10373136	1
WBGene00002153	14134.1	0.0327636	0.0943643	0.347203	0.728439	0.999992	iars-2	I	10180249	10184075	1
WBGene00002162	39196	-0.00172206	0.108211	-0.0159139	0.987303	0.999992	isp-1	IV	8133789	8136055	-1
WBGene00002163	590.85	0.13955	0.225547	0.618719	0.536101	0.999992	ist-1	X	7126648	7139646	1
WBGene00002169	31813.5	-0.036924	0.0946353	-0.390172	0.69641	0.999992	isw-1	III	6703993	6710084	-1
WBGene00002173	9828.64	0.0113732	0.0465129	0.244517	0.806831	0.999992	itr-1	IV	7675174	7696923	1
WBGene00002174	4293.1	-0.0197957	0.0901107	-0.219682	0.826119	0.999992	itx-1	I	2802822	2815786	1
WBGene00002175	3949.18	-0.0172167	0.0528418	-0.325816	0.744563	0.999992	jac-1	IV	15997858	16026847	-1
WBGene00002176	469.142	0.060607	0.191826	0.315948	0.752042	0.999992	jip-1	II	1326995	1350136	1
WBGene00002177	67.6205	0.0797428	0.580556	0.137356	0.890749	0.999992	jkk-1	X	5368468	5372059	1
WBGene00002178	259.942	-0.126073	0.186259	-0.676872	0.498487	0.999992	jnk-1	IV	6957641	6963716	1
WBGene00002179	3663.37	-0.0477517	0.127153	-0.375545	0.707255	0.999992	jph-1	I	7946186	7951593	-1
WBGene00002180	2220.17	-0.00802668	0.0642911	-0.124849	0.900643	0.999992	jtr-1	IV	1420929	1421770	1
WBGene00002181	968.755	-0.0138838	0.131704	-0.105417	0.916045	0.999992	kal-1	I	14128594	14142207	-1
WBGene00002182	392.888	0.0743243	0.194565	0.382001	0.70246	0.999992	kap-1	III	7339001	7343626	1
WBGene00002183	33384.1	-0.042566	0.0941096	-0.452302	0.651051	0.999992	kat-1	II	7073796	7075551	1
WBGene00002184	312.501	0.0725198	0.149934	0.483679	0.628614	0.999992	kel-1	II	11688970	11696003	1
WBGene00002185	5173.75	-0.0210971	0.0917447	-0.229955	0.818127	0.999992	kel-3	III	13464829	13471348	1
WBGene00002186	516.504	-0.0273526	0.59798	-0.0457416	0.963516	0.999992	kel-10	III	10098469	10101608	-1
WBGene00002187	2455.03	0.0497058	0.0835794	0.594714	0.552035	0.999992	kgb-1	IV	405621	410033	-1
WBGene00002188	159.958	0.0706445	0.289151	0.244317	0.806985	0.999992	kgb-2	IV	3606784	3609229	1
WBGene00002189	5233.24	0.0340613	0.12114	0.281172	0.778578	0.999992	kin-1	I	14913623	14951924	1
WBGene00002190	8716.39	0.0104045	0.110828	0.0938803	0.925204	0.999992	kin-2	X	5970677	5977854	-1
WBGene00002191	28370	0.0128123	0.058175	0.220237	0.825687	0.999992	kin-3	I	10734022	10736615	1
WBGene00002192	31228.4	0.020334	0.0737444	0.275736	0.782751	0.999992	kin-4	IV	11425742	11447060	1
WBGene00002193	260.108	-0.0238364	0.72038	-0.0330887	0.973604	0.999992	kin-5	IV	9967095	9969181	-1
WBGene00002194	9.56638	2.45781	2.08073	1.18122	0.237514	0.999992	kin-6	II	11640454	11641778	1
WBGene00002195	173.903	-0.132983	0.271928	-0.489037	0.624815	0.999992	kin-9	X	8432663	8437346	1
WBGene00002196	23462.3	0.00669989	0.0380275	0.176185	0.860148	0.999992	kin-10	I	8288959	8291077	-1
WBGene00002198	582.852	0.0774866	0.265643	0.291694	0.77052	0.999992	kin-14	I	7075918	7079566	-1
WBGene00002199	681.091	0.0179695	0.157148	0.114347	0.908963	0.999992	kin-15	II	9431383	9433709	-1
WBGene00002200	648.529	-0.00412014	0.115995	-0.0355199	0.971665	0.999992	kin-16	II	9434021	9436120	-1
WBGene00002201	21398.2	0.0119047	0.0613835	0.193939	0.846224	0.999992	kin-18	III	6118627	6124055	1
WBGene00002202	42182.2	-0.0105978	0.0381116	-0.278072	0.780957	0.999992	kin-19	III	4084003	4086636	-1
WBGene00002203	3804.76	0.0191319	0.1156	0.165501	0.86855	0.999992	kin-20	X	15269074	15281110	-1
WBGene00002204	84.1949	-0.206936	0.648142	-0.319276	0.749517	0.999992	kin-21	IV	9832935	9834822	1
WBGene00002205	17.6504	0.487313	1.27296	0.382819	0.701854	0.999992	kin-23	I	11640687	11642206	-1
WBGene00002206	91.7327	-0.0729955	0.831923	-0.0877431	0.930081	0.999992	kin-24	IV	9839057	9841084	-1
WBGene00002207	6566.69	0.00834494	0.0984746	0.0847421	0.932466	0.999992	sid-3	X	17186380	17193289	1
WBGene00002208	71.8179	0.237051	0.785195	0.3019	0.762728	0.999992	kin-26	IV	7875727	7877881	-1
WBGene00002210	2730.77	-0.0691538	0.0855949	-0.807919	0.419137	0.999992	kin-29	X	2843922	2852520	-1
WBGene00002211	127.112	0.119735	0.261307	0.458216	0.646797	0.999992	kin-30	V	15244756	15247707	1
WBGene00002212	119.991	0.0967696	0.576319	0.16791	0.866654	0.999992	kin-31	III	8671772	8673626	1
WBGene00002213	1613.89	-0.0497685	0.0891199	-0.558444	0.576541	0.999992	kin-32	I	5086317	5093793	1
WBGene00002214	23753.7	-0.0325563	0.0688363	-0.472953	0.636247	0.999992	klc-1	IV	11083735	11086050	1
WBGene00002215	5167.98	-0.0368853	0.0547624	-0.673552	0.500596	0.999992	klc-2	V	5576481	5581713	-1
WBGene00002216	1715.3	0.0227013	0.08383	0.270802	0.786544	0.999992	klp-3	II	7842353	7845653	1
WBGene00002217	4493.06	0.0170766	0.0769288	0.221979	0.82433	0.999992	klp-4	X	3171424	3178695	-1
WBGene00002218	38.3399	0.405419	0.670906	0.604287	0.545653	0.999992	klp-6	III	5030929	5036548	1
WBGene00002219	19312.5	-0.0533862	0.111016	-0.480889	0.630595	0.999992	klp-7	III	10805930	10810999	1
WBGene00002220	1548.39	-0.0886073	0.10194	-0.869214	0.38473	0.999992	gcc-1	X	3159940	3164424	1
WBGene00002221	11220.2	-0.141686	0.154242	-0.918596	0.358307	0.999992	klp-10	IV	7797192	7800252	1
WBGene00002222	780.435	0.0240577	0.215291	0.111745	0.911025	0.999992	klp-11	IV	8756735	8762057	-1
WBGene00002223	22814.7	0.000376081	0.081564	0.00461088	0.996321	0.999992	klp-12	IV	11341325	11359863	-1
WBGene00002224	198.032	0.0201314	0.204622	0.0983834	0.921628	0.999992	klp-13	X	5984975	5992103	1
WBGene00002225	26615.7	-0.0932613	0.14023	-0.665058	0.506014	0.999992	klp-15	I	5577055	5579394	-1
WBGene00002226	23501.4	-0.107099	0.124674	-0.859031	0.390324	0.999992	klp-16	I	9512428	9514755	1
WBGene00002227	185.79	-0.151814	0.594343	-0.255432	0.79839	0.999992	klp-17	II	11465940	11467641	-1
WBGene00002228	23699.5	-0.105544	0.0974535	-1.08302	0.278801	0.999992	klp-18	IV	7040211	7043694	1
WBGene00002229	35216.6	-0.0759066	0.0907042	-0.836859	0.402672	0.999992	klp-19	III	13302743	13307259	-1
WBGene00002230	2631.01	-0.130678	0.131719	-0.992097	0.32115	0.999992	klp-20	III	209992	230450	1
WBGene00002231	24118.9	-0.0131081	0.0602902	-0.217417	0.827883	0.999992	knl-1	III	8250636	8254286	1
WBGene00002232	2354.56	-0.0139896	0.0867742	-0.161219	0.871921	0.999992	kpc-1	I	11675850	11680975	1
WBGene00002233	271.676	0.0931844	0.295795	0.315031	0.752738	0.999992	kqt-1	X	6619022	6628017	1
WBGene00002234	945.299	-0.00583221	0.193265	-0.0301773	0.975926	0.999992	kqt-2	X	8243131	8246369	-1
WBGene00002235	620.446	-0.0851913	0.141113	-0.603711	0.546036	0.999992	kqt-3	II	13703877	13712911	1
WBGene00002238	72363.9	-0.0416318	0.0510752	-0.815109	0.41501	0.999992	kars-1	II	7070183	7072415	-1
WBGene00002239	1540.49	-0.0485667	0.0812026	-0.598093	0.549778	0.999992	ksr-1	X	8275158	8283301	1
WBGene00002240	9772.97	0.0443021	0.0871229	0.508501	0.611102	0.999992	ksr-2	I	12047469	12059798	-1
WBGene00002241	8447.1	-0.0563406	0.0858606	-0.656187	0.511704	0.999992	kup-1	V	12032257	12040873	-1
WBGene00002242	235.661	-0.0683804	0.222978	-0.306668	0.759096	0.999992	kvs-1	X	7690590	7707086	-1
WBGene00002243	459.787	-0.11716	0.181545	-0.645345	0.518703	0.999992	lad-2	IV	2964365	2978461	-1
WBGene00002244	28550.1	-0.0189702	0.0454944	-0.416979	0.676694	0.999992	laf-1	III	2769358	2779053	-1
WBGene00002245	14656	-0.00856805	0.0897165	-0.0955014	0.923917	0.999992	lag-1	IV	6095411	6110639	1
WBGene00002246	96.8585	0.0781576	0.375544	0.208118	0.835137	0.999992	lag-2	V	3188350	3189841	1
WBGene00002247	15743	-0.026112	0.114637	-0.227779	0.819818	0.999992	lam-1	IV	5173280	5183708	1
WBGene00002248	4609.96	0.00649437	0.123304	0.0526694	0.957995	0.999992	lam-3	I	10608466	10621433	1
WBGene00002249	24212.4	-0.0148155	0.0594925	-0.249032	0.803336	0.999992	lap-1	III	8399190	8401928	-1
WBGene00002250	43064.3	-0.0022364	0.0506171	-0.0441827	0.964759	0.999992	lap-2	V	13043712	13046355	1
WBGene00002251	24575.2	-0.0124798	0.0793934	-0.157189	0.875096	0.999992	lat-1	II	8896841	8908666	1
WBGene00002252	436.833	0.0217002	0.225949	0.0960402	0.923489	0.999992	lat-2	II	4359082	4368332	1
WBGene00002253	5763.96	-0.0155267	0.0791687	-0.196121	0.844515	0.999992	lbp-1	X	3259087	3259855	1
WBGene00002254	21526	-0.0597069	0.0612918	-0.974143	0.329986	0.999992	lbp-2	X	3260610	3261470	1
WBGene00002255	4027.59	-0.135939	0.149094	-0.911761	0.361895	0.999992	lbp-3	X	3257010	3258155	1
WBGene00002256	4722.86	-0.0282686	0.0700564	-0.403512	0.686571	0.999992	lbp-4	V	7820578	7821477	1
WBGene00002257	1169.14	-0.0170983	0.0871627	-0.196165	0.844481	0.999992	lbp-5	I	6731267	6732280	-1
WBGene00002258	23387.4	-0.0433676	0.103877	-0.417492	0.676319	0.999992	lbp-6	I	6728290	6729376	-1
WBGene00002259	847.631	-0.0113087	0.176028	-0.0642441	0.948776	0.999992	lbp-7	V	13879552	13880213	1
WBGene00002260	80.2567	-0.448657	0.488046	-0.919291	0.357943	0.999992	lbp-8	V	13890679	13891364	1
WBGene00002261	3554.93	-0.0073001	0.0826779	-0.0882956	0.929642	0.999992	ldb-1	X	11028917	11040612	1
WBGene00002262	15806.3	-0.0606719	0.13209	-0.45932	0.646004	0.999992	ldh-1	II	11724204	11726533	1
WBGene00002263	28532.1	-0.00916947	0.0720621	-0.127244	0.898747	0.999992	lea-1	V	10011871	10028158	1
WBGene00002264	41741.9	-0.0306911	0.140987	-0.217687	0.827673	0.999992	lec-1	II	13195549	13199603	1
WBGene00002265	33044.3	0.00862404	0.10357	0.0832678	0.933639	0.999992	lec-2	II	10009608	10016183	-1
WBGene00002266	2428.43	-0.055231	0.190109	-0.290522	0.771417	0.999992	lec-3	II	9991160	10000350	1
WBGene00002267	5354.92	-0.0341466	0.201456	-0.169499	0.865404	0.999992	lec-4	III	3771425	3773394	-1
WBGene00002268	18593.9	-0.0247172	0.0573417	-0.431051	0.666431	0.999992	lec-5	II	5839639	5841134	-1
WBGene00002269	24245.5	-0.0419501	0.0706654	-0.593644	0.55275	0.999992	lec-6	III	599509	600366	-1
WBGene00002270	71.0282	-0.00744167	0.596796	-0.0124694	0.990051	0.999992	lec-7	X	9852139	9852909	1
WBGene00002271	10846.1	-0.044377	0.128344	-0.345765	0.729519	0.999992	lec-8	X	9850209	9851375	1
WBGene00002272	7738.84	-0.0261688	0.064642	-0.404827	0.685605	0.999992	lec-9	X	17600412	17601503	1
WBGene00002273	11343.6	-0.0193721	0.148055	-0.130845	0.895898	0.999992	lec-10	V	6488203	6489120	-1
WBGene00002274	860.165	0.10415	0.118106	0.881838	0.377865	0.999992	lec-11	IV	6588184	6590307	-1
WBGene00002275	11066.5	-0.0114015	0.0434174	-0.262603	0.792857	0.999992	lem-2	II	14063450	14066170	1
WBGene00002276	11623.3	-0.0524735	0.0705249	-0.744042	0.456851	0.999992	lem-3	I	9578526	9581267	-1
WBGene00002278	3252.88	-0.0300323	0.093395	-0.321562	0.747784	0.999992	lep-2	IV	992240	998348	1
WBGene00002280	106162	-0.00741197	0.19628	-0.0377623	0.969877	0.999992	let-2	X	16380597	16389371	-1
WBGene00002282	481.427	-0.119202	0.227543	-0.523864	0.600373	0.999992	let-4	X	14577935	14580921	1
WBGene00002285	2.34701	0.385422	1.71764	0.22439	0.822454	0.999992	let-7	X	14744173	14744271	-1
WBGene00002295	9351.3	-0.0128287	0.0733013	-0.175013	0.861069	0.999992	let-19	II	8770975	8782020	1
WBGene00002297	16747.9	0.108993	0.0946615	1.15139	0.24957	0.999992	ect-2	II	10778389	10783962	-1
WBGene00002299	2451.36	0.0309621	0.0765906	0.404255	0.686025	0.999992	let-23	II	9197518	9207210	1
WBGene00002324	3707.99	-0.0406048	0.117435	-0.345763	0.729521	0.999992	let-49	I	14820381	14821651	1
WBGene00002335	8276.16	0.0127744	0.0495252	0.257937	0.796456	0.999992	let-60	IV	11688227	11691088	-1
WBGene00002344	68509.8	0.0279466	0.0473481	0.590237	0.555032	0.999992	let-70	IV	11080989	11082253	-1
WBGene00002348	16080.1	0.00354486	0.194212	0.0182525	0.985437	0.999992	myo-1	I	7258915	7267117	-1
WBGene00002363	43774.6	0.0267496	0.0645657	0.414301	0.678654	0.999992	let-92	IV	11856629	11860460	1
WBGene00002368	15403.1	-0.0135486	0.0845024	-0.160333	0.872618	0.999992	let-99	IV	12567842	12570622	1
WBGene00002393	85.4009	0.0789857	0.479481	0.164732	0.869155	0.999992	lpr-1	I	557375	561671	1
WBGene00002497	2212.21	-0.0101849	0.096192	-0.105881	0.915677	0.999992	let-268	II	10033309	10039980	-1
WBGene00002583	24181.3	-0.00905094	0.0746318	-0.121275	0.903473	0.999992	let-363	I	5245743	5263413	1
WBGene00002601	151.732	0.0124713	0.254772	0.0489507	0.960959	0.999992	let-381	I	6320289	6324018	-1
WBGene00002632	4138.94	0.00845617	0.0784667	0.107768	0.91418	0.999992	let-413	V	7972924	7977774	-1
WBGene00002637	42913.8	-0.0377515	0.0564745	-0.66847	0.503834	0.999992	let-418	V	5826833	5832866	1
WBGene00002694	24948.1	-0.00767085	0.0639802	-0.119894	0.904567	0.999992	let-502	I	4738171	4744321	-1
WBGene00002696	14830	-0.04543	0.0865592	-0.524844	0.599692	0.999992	let-504	I	4129469	4132292	-1
WBGene00002717	30110.3	0.0216997	0.0386613	0.561276	0.574609	0.999992	let-526	I	5300901	5317392	-1
WBGene00002783	19667.1	-0.0273477	0.0581768	-0.47008	0.638298	0.999992	let-607	I	6574004	6585510	1
WBGene00002804	11140.3	-0.0186104	0.0427669	-0.435159	0.663447	0.999992	let-630	I	5162599	5164884	-1
WBGene00002827	678.97	0.106073	0.137622	0.770756	0.440852	0.999992	let-653	IV	11885530	11891081	1
WBGene00002845	107685	-0.034724	0.0726685	-0.477842	0.632763	0.999992	let-711	III	6946718	6958882	1
WBGene00002850	32775.9	-0.0667681	0.0730891	-0.913517	0.360971	0.999992	let-716	III	6383552	6389401	1
WBGene00002855	23032.9	-0.0261155	0.0731538	-0.356994	0.721096	0.999992	let-721	III	6444693	6446943	-1
WBGene00002879	18261	-0.0315051	0.0913072	-0.345045	0.73006	0.999992	let-754	III	7949975	7951915	-1
WBGene00002881	644.281	-0.0418372	0.119355	-0.350528	0.725943	0.999992	let-756	III	6407129	6410018	1
WBGene00002889	29490.1	-0.0296575	0.0573802	-0.51686	0.605254	0.999992	let-765	III	6592567	6601171	-1
WBGene00002891	30464.1	-0.041956	0.10471	-0.400688	0.68865	0.999992	let-767	III	6338508	6340228	-1
WBGene00002915	19300.4	-0.00992914	0.164385	-0.0604017	0.951836	0.999992	let-805	III	2658083	2681112	1
WBGene00002957	16981.3	-0.030777	0.0494773	-0.622043	0.533914	0.999992	let-858	II	11022370	11027909	1
WBGene00002974	568.574	-0.027949	0.12929	-0.216174	0.828852	0.999992	lev-1	IV	13174157	13179457	-1
WBGene00002975	185.985	0.0239211	0.341866	0.069972	0.944216	0.999992	lev-8	X	11560915	11563697	1
WBGene00002976	480.111	0.0227005	0.183132	0.123957	0.90135	0.999992	lev-9	X	6281847	6291732	-1
WBGene00002977	2434.99	0.00234055	0.118204	0.019801	0.984202	0.999992	lev-10	I	14390333	14400222	1
WBGene00002978	88198.6	-0.00448713	0.163594	-0.0274285	0.978118	0.999992	lev-11	I	14621173	14631254	-1
WBGene00002979	3254.64	-0.0196705	0.0777232	-0.253084	0.800204	0.999992	lfe-2	I	5023889	5041149	1
WBGene00002980	28816.5	0.0774869	0.10049	0.771091	0.440653	0.999992	lgg-1	II	6346960	6347719	-1
WBGene00002981	11026.1	0.0882708	0.159153	0.55463	0.579148	0.999992	lgg-2	IV	10934186	10935914	-1
WBGene00002982	1753	-0.0049791	0.0681729	-0.0730364	0.941777	0.999992	lgg-3	III	5697477	5698013	-1
WBGene00002983	330.626	0.0217468	0.318486	0.0682816	0.945561	0.999992	lgx-1	X	5525199	5538514	-1
WBGene00002985	17721	-0.00547825	0.0819739	-0.0668291	0.946718	0.999992	lig-1	V	10814113	10816718	1
WBGene00002986	5778.58	-0.0180721	0.113604	-0.159079	0.873606	0.999992	lig-4	III	7521004	7524836	1
WBGene00002987	55.5775	-0.10179	0.441615	-0.230494	0.817708	0.999992	lim-4	X	3869753	3873295	-1
WBGene00002988	267.379	-0.0763401	0.270888	-0.281814	0.778086	0.999992	lim-6	X	1073908	1079451	1
WBGene00002989	722.047	0.0383679	0.116552	0.329192	0.742011	0.999992	lim-7	I	5716574	5725772	1
WBGene00002990	1019.58	0.0813987	0.162505	0.500899	0.616443	0.999992	lin-1	IV	2275864	2300351	-1
WBGene00002991	1246.45	-0.00415633	0.111827	-0.0371676	0.970351	0.999992	lin-2	X	12399517	12414037	-1
WBGene00002992	5674.91	0.0286837	0.0940227	0.305072	0.760312	0.999992	lin-3	IV	11054308	11063613	1
WBGene00002994	23196.8	-0.0910502	0.0828364	-1.09916	0.2717	0.999992	lin-5	II	7860574	7863563	1
WBGene00002996	3656.6	0.0183909	0.053372	0.344579	0.730411	0.999992	lin-7	II	14346877	14348792	-1
WBGene00002997	1471.76	-0.0853536	0.120172	-0.71026	0.477543	0.999992	lin-8	II	3056822	3060207	1
WBGene00002998	11263.2	0.0269072	0.0958828	0.280625	0.778998	0.999992	lin-9	III	8900237	8904160	-1
WBGene00002999	6684.35	0.0202747	0.0767962	0.264007	0.791775	0.999992	lin-10	I	8109746	8119314	-1
WBGene00003000	370.735	-0.0019604	0.185445	-0.0105714	0.991565	0.999992	lin-11	I	10248256	10255327	1
WBGene00003001	1167.17	-0.00946457	0.137132	-0.0690178	0.944975	0.999992	lin-12	III	9060096	9071760	-1
WBGene00003002	30183.8	-0.00123436	0.0622817	-0.019819	0.984188	0.999992	lin-13	III	7700338	7709491	-1
WBGene00003003	1900.08	0.00413004	0.0710584	0.0581218	0.953652	0.999992	lin-14	X	11465557	11484368	1
WBGene00003006	1266.57	0.0206625	0.102512	0.201562	0.840259	0.999992	lin-17	I	2706883	2717549	1
WBGene00003007	1500.12	-0.047292	0.114787	-0.411999	0.68034	0.999992	lin-18	X	3958497	3961907	1
WBGene00003008	41.9972	-0.0261494	0.579544	-0.0451206	0.964011	0.999992	lin-22	IV	3019738	3022315	1
WBGene00003009	20862.8	0.0699798	0.123158	0.568213	0.56989	0.999992	lin-23	II	6371295	6374544	1
WBGene00003010	5510.6	0.00755737	0.0907264	0.0832984	0.933614	0.999992	lin-24	IV	12129504	12135096	1
WBGene00003011	3185.61	0.138928	0.177117	0.784384	0.432815	0.999992	lin-25	V	12649858	12658718	1
WBGene00003012	11909.2	0.0137473	0.087984	0.156247	0.875838	0.999992	lin-26	II	7682198	7684760	1
WBGene00003014	3538.78	-0.0487693	0.103877	-0.469493	0.638718	0.999992	lin-28	I	8407802	8410804	-1
WBGene00003015	634.155	0.0437328	0.246318	0.177546	0.85908	0.999992	lin-29	II	11917642	11935343	-1
WBGene00003017	172.491	-0.0827352	0.384496	-0.215178	0.829628	0.999992	lin-31	II	3982549	3986944	1
WBGene00003018	81.967	0.238334	0.48247	0.493986	0.621316	0.999992	lin-32	X	2229208	2230122	-1
WBGene00003019	1019.64	-0.0119426	0.152158	-0.0784879	0.93744	0.999992	lin-33	IV	5930645	5933326	1
WBGene00003020	15945.6	0.0496257	0.178588	0.277878	0.781106	0.999992	lin-35	I	5807709	5815637	1
WBGene00003021	18765.1	-0.0798427	0.0851841	-0.937296	0.348606	0.999992	lin-36	III	8016648	8020873	-1
WBGene00003022	6911.71	-0.0176309	0.0798701	-0.220744	0.825292	0.999992	lin-37	III	7070800	7072552	-1
WBGene00003024	555.537	0.0901066	0.171483	0.525456	0.599266	0.999992	lin-39	III	7528641	7536632	-1
WBGene00003025	15887.9	-0.0138874	0.0808067	-0.171859	0.863548	0.999992	lin-40	V	3704988	3712796	1
WBGene00003026	71152	-0.0286623	0.104393	-0.274562	0.783653	0.999992	lin-41	I	9334812	9342496	-1
WBGene00003029	112.98	-0.029332	0.347447	-0.0844215	0.932721	0.999992	lin-44	I	4126056	4129307	1
WBGene00003030	15346.5	-0.00587759	0.112773	-0.0521189	0.958434	0.999992	lin-45	IV	6742538	6748424	-1
WBGene00003031	125.17	0.0422832	0.23972	0.176386	0.85999	0.999992	lin-46	V	12968855	12970730	1
WBGene00003033	80.2729	-0.0634562	0.330992	-0.191715	0.847965	0.999992	lin-48	III	3745461	3747451	1
WBGene00003034	10720.1	-0.00735881	0.0986936	-0.0745621	0.940563	0.999992	lin-49	IV	8620683	8626149	1
WBGene00003035	3453.46	-0.0627395	0.0918963	-0.682721	0.494783	0.999992	lin-52	III	9824081	9824750	-1
WBGene00003036	33447.2	-0.0326405	0.0523698	-0.62327	0.533107	0.999992	lin-53	I	9618207	9619760	-1
WBGene00003037	10706	-0.0127701	0.0588657	-0.216936	0.828259	0.999992	lin-54	IV	13241051	13243401	1
WBGene00003038	2382.73	0.0188858	0.117265	0.161052	0.872052	0.999992	lin-56	II	10450607	10452004	1
WBGene00003040	25028.2	-0.0328713	0.0640869	-0.512918	0.608008	0.999992	lin-59	I	3713142	3721157	-1
WBGene00003041	9056.92	0.0115669	0.111635	0.103614	0.917475	0.999992	lin-61	I	7248828	7251422	-1
WBGene00003043	12041.9	0.0432904	0.10711	0.404168	0.686089	0.999992	lip-1	IV	6842964	6845805	1
WBGene00003044	5752.65	-0.0194902	0.27841	-0.0700053	0.944189	0.999992	lir-1	II	7672010	7682359	1
WBGene00003045	3931.87	-0.0714746	0.0857775	-0.833256	0.4047	0.999992	lir-2	II	7667993	7671905	1
WBGene00003046	456.622	-0.256667	0.208831	-1.22906	0.219048	0.999992	lir-3	II	11183075	11184807	-1
WBGene00003047	11130.3	0.00892212	0.0397198	0.224626	0.82227	0.999992	lis-1	III	13371175	13376710	-1
WBGene00003048	9292.93	0.0228215	0.0599739	0.380524	0.703557	0.999992	lit-1	III	13701993	13724401	1
WBGene00003052	42532.5	-0.000573154	0.0438917	-0.0130584	0.989581	0.999992	lmn-1	I	8762986	8765633	1
WBGene00003053	11119.6	-4.78263e-05	0.0686181	-0.000696993	0.999444	0.999992	lmp-1	X	6376459	6377684	-1
WBGene00003055	12045.9	-0.0562799	0.117114	-0.480556	0.630832	0.999992	lon-1	III	5474478	5478005	1
WBGene00003056	2099.94	0.0564863	0.0984343	0.573848	0.566071	0.999992	lon-2	X	4738964	4749083	-1
WBGene00003057	227.568	0.104708	0.473454	0.221158	0.82497	0.999992	lon-3	V	12197437	12198645	-1
WBGene00003059	4961.24	-0.10289	0.0870338	-1.18218	0.237134	0.999992	lpd-2	I	6253701	6254947	1
WBGene00003060	15221.8	-0.0330538	0.0488546	-0.676575	0.498676	0.999992	lpd-3	I	3565012	3600729	-1
WBGene00003061	11909.7	-0.034991	0.108372	-0.322878	0.746788	0.999992	lpd-5	I	4372255	4373018	-1
WBGene00003062	21125.4	-0.0585356	0.0876244	-0.668029	0.504115	0.999992	lpd-6	I	3144410	3147793	-1
WBGene00003063	30386.3	-0.0521916	0.0691531	-0.754726	0.450414	0.999992	lpd-7	III	7573350	7575263	1
WBGene00003064	7534.05	-0.0286618	0.0647493	-0.442658	0.658013	0.999992	lpd-8	IV	10387413	10388345	1
WBGene00003065	8392.79	0.0183566	0.102283	0.179469	0.85757	0.999992	lpd-9	V	10579309	10580693	1
WBGene00003066	7064.59	-0.0138182	0.068697	-0.201148	0.840583	0.999992	lpl-1	IV	9092281	9093975	-1
WBGene00003067	4565.93	-0.0887185	0.0909005	-0.975996	0.329066	0.999992	lrg-1	III	9504764	9507081	1
WBGene00003068	6447	-0.0306668	0.0651893	-0.470427	0.63805	0.999992	lrk-1	I	10879769	10894239	-1
WBGene00003071	8552.96	-0.00212783	0.0496547	-0.0428526	0.965819	0.999992	lrp-1	I	7614176	7634135	1
WBGene00003072	8973.23	-0.0887298	0.101787	-0.871723	0.38336	0.999992	lrp-2	I	3935272	3953991	-1
WBGene00003073	38745.9	-0.037925	0.0458573	-0.827023	0.408224	0.999992	lars-1	III	4181543	4186825	-1
WBGene00003074	5847.87	-0.0161488	0.0939294	-0.171925	0.863496	0.999992	lars-2	I	7457153	7460756	-1
WBGene00003075	55.4125	0.0839738	0.575571	0.145897	0.884003	0.999992	lrx-1	V	12252623	12255450	1
WBGene00003076	5958.42	-0.0126385	0.0776539	-0.162755	0.870712	0.999992	lsm-1	II	11126932	11127530	1
WBGene00003077	3116.48	-0.0189837	0.0858058	-0.22124	0.824906	0.999992	lsm-3	IV	13387469	13389209	1
WBGene00003078	5476.79	0.0208701	0.053912	0.387114	0.698672	0.999992	lsm-4	II	7252230	7253222	-1
WBGene00003079	3596.35	-0.0214496	0.0875144	-0.245097	0.806381	0.999992	lsm-5	V	15569935	15570742	1
WBGene00003080	2720.95	-0.0610519	0.0819615	-0.744885	0.456341	0.999992	lsm-6	I	1701361	1701808	1
WBGene00003081	5458.25	-0.0383169	0.10017	-0.382519	0.702077	0.999992	lsm-7	IV	10933502	10934200	1
WBGene00003082	5647.85	-0.00998833	0.0528253	-0.189082	0.850028	0.999992	lsm-8	IV	6326526	6329461	1
WBGene00003083	11068.7	-0.00898033	0.0828737	-0.108362	0.913709	0.999992	lst-1	I	10588177	10590464	1
WBGene00003084	2767.75	-0.0228367	0.0924423	-0.247037	0.80488	0.999992	lst-2	X	4378004	4383366	-1
WBGene00003085	50156.7	-0.0193175	0.0450333	-0.42896	0.667952	0.999992	ccar-1	IV	14071503	14076743	1
WBGene00003086	12819.1	-0.0983766	0.111805	-0.879891	0.378918	0.999992	lst-4	IV	14061005	14069854	-1
WBGene00003087	3359.17	-0.0107724	0.0747933	-0.144029	0.885478	0.999992	lsy-2	X	2089659	2093253	1
WBGene00003089	561.303	0.145241	0.196655	0.738556	0.460177	0.999992	ltd-1	II	8088427	8092754	-1
WBGene00003090	31755.5	-0.0751032	0.0900068	-0.834417	0.404046	0.999992	lys-1	V	10277827	10279127	1
WBGene00003091	3918.77	-0.00922231	0.251395	-0.0366845	0.970737	0.999992	lys-2	V	10280310	10281474	-1
WBGene00003092	62.7083	-0.024537	0.364652	-0.0672889	0.946352	0.999992	lys-3	V	10282204	10283544	-1
WBGene00003093	36978.7	-0.00679567	0.140858	-0.0482449	0.961521	0.999992	lys-4	IV	11621443	11623174	-1
WBGene00003094	524.404	-0.0133294	0.135952	-0.0980449	0.921897	0.999992	lys-5	IV	11624255	11625582	-1
WBGene00003095	616.876	-0.0513168	0.153177	-0.335015	0.737614	0.999992	lys-6	IV	11626910	11627947	-1
WBGene00003096	26544.9	-0.0317348	0.17006	-0.18661	0.851967	0.999992	lys-7	V	3481421	3482600	-1
WBGene00003097	19278.9	-0.0489301	0.058277	-0.839613	0.401126	0.999992	lys-8	II	5586165	5587651	1
WBGene00003099	157.134	-0.00205581	0.268692	-0.00765118	0.993895	0.999992	lys-10	IV	8332826	8333559	1
WBGene00003100	117.041	0.268673	0.357683	0.751149	0.452563	0.999992	mab-3	II	9732137	9738035	1
WBGene00003102	148.172	0.0415049	0.208481	0.199082	0.842199	0.999992	mab-5	III	7776835	7783454	-1
WBGene00003104	129.654	-0.00654384	0.331891	-0.0197168	0.984269	0.999992	mab-7	X	892228	898117	-1
WBGene00003106	37.5472	-0.65279	0.565635	-1.15408	0.248466	0.999992	mab-9	II	516014	521605	1
WBGene00003107	1630.38	0.0522849	0.121851	0.429091	0.667857	0.999992	mab-10	II	10528084	10533880	1
WBGene00003111	2920.7	-0.0135814	0.124586	-0.109012	0.913193	0.999992	mab-20	I	1644588	1651394	-1
WBGene00003112	303.678	0.0427187	0.221635	0.192743	0.84716	0.999992	mab-21	III	4600737	4603052	1
WBGene00003114	3.50905	0.254715	2.85903	0.0890912	0.929009	0.999992	mab-23	V	10633058	10635411	1
WBGene00003119	10498.7	-0.0393757	0.106383	-0.370132	0.711284	0.999992	mac-1	II	13311459	13320911	-1
WBGene00003123	26420.4	-0.0286925	0.0783446	-0.366235	0.71419	0.999992	mag-1	I	11912005	11912677	-1
WBGene00003124	478.343	-0.179912	0.290603	-0.619098	0.535852	0.999992	mai-1	X	3114668	3116538	-1
WBGene00003129	6417.81	-0.0853559	0.111723	-0.763995	0.44487	0.999992	map-1	IV	3683537	3686865	-1
WBGene00003130	22293.8	-0.0139156	0.0930926	-0.149481	0.881174	0.999992	map-2	IV	16847829	16854943	-1
WBGene00003132	24750.1	-0.0291561	0.0656082	-0.444397	0.656756	0.999992	mat-1	I	5123916	5127199	-1
WBGene00003133	22188.5	-0.0354888	0.0547629	-0.648045	0.516956	0.999992	mat-2	II	11112719	11120788	1
WBGene00003134	10552.7	-0.0132093	0.056733	-0.232833	0.815891	0.999992	mat-3	III	475454	482322	1
WBGene00003136	6382.39	0.135013	0.176486	0.76501	0.444266	0.999992	mau-2	I	8125801	8130091	1
WBGene00003142	3258.49	-0.0513695	0.10874	-0.472408	0.636636	0.999992	mau-8	IV	13378016	13380407	1
WBGene00003143	882.248	-0.00494146	0.223414	-0.0221179	0.982354	0.999992	max-1	V	13098910	13110337	-1
WBGene00003144	21212.8	-0.000946343	0.0576221	-0.0164232	0.986897	0.999992	max-2	II	13014331	13025838	-1
WBGene00003148	14574.9	-0.0227316	0.0749611	-0.303245	0.761703	0.999992	mbf-1	IV	11479358	11480369	-1
WBGene00003149	3806.92	-0.0917501	0.109067	-0.841223	0.400223	0.999992	mbk-1	X	14819909	14824540	-1
WBGene00003150	44428.1	-0.00394911	0.0865209	-0.0456435	0.963594	0.999992	mbk-2	IV	13009116	13035955	1
WBGene00003151	17160.2	0.000580721	0.0455624	0.0127456	0.989831	0.999992	mca-1	IV	9625910	9634948	-1
WBGene00003153	43940.8	-0.00589192	0.0527905	-0.111609	0.911133	0.999992	mca-3	IV	3103157	3133147	-1
WBGene00003154	46915.6	-0.00185757	0.03771	-0.0492592	0.960713	0.999992	mcm-2	II	12001510	12006625	-1
WBGene00003155	38028.8	-0.0289568	0.0649057	-0.446136	0.655499	0.999992	mcm-3	V	15056719	15059599	-1
WBGene00003156	32461.7	-0.0351093	0.0602974	-0.582269	0.560385	0.999992	mcm-4	I	2318291	2321847	-1
WBGene00003157	41601.7	-0.0457254	0.0614315	-0.744332	0.456676	0.999992	mcm-5	III	4288264	4291283	-1
WBGene00003158	44691.6	-0.0493974	0.071979	-0.686275	0.49254	0.999992	mcm-6	III	9794367	9798643	1
WBGene00003159	49647	-0.0474872	0.0863809	-0.549742	0.582496	0.999992	mcm-7	V	4347166	4349768	1
WBGene00003160	18920.6	-0.0645121	0.0631827	-1.02104	0.307235	0.999992	mdf-1	V	9541782	9544226	-1
WBGene00003161	6277.54	0.0848164	0.128968	0.657655	0.51076	0.999992	mdf-2	IV	2636228	2641117	-1
WBGene00003162	76719.8	-0.0221127	0.0857871	-0.257762	0.79659	0.999992	mdh-2	III	6606247	6608106	-1
WBGene00003163	2380.9	0.557776	0.609326	0.915399	0.359982	0.999992	mdl-1	X	6742351	6743899	1
WBGene00003164	7244.09	-0.0325747	0.0700945	-0.464726	0.642128	0.999992	mdt-6	V	7058547	7059624	-1
WBGene00003165	311.396	-0.0589474	0.14713	-0.400648	0.68868	0.999992	mec-1	V	6956537	6966422	1
WBGene00003166	260.941	0.0523543	0.17616	0.297197	0.766316	0.999992	mec-2	X	5567240	5590815	1
WBGene00003167	110.308	-0.0836885	0.261372	-0.320189	0.748825	0.999992	mec-3	IV	10458863	10461766	-1
WBGene00003168	34.4148	-0.0284704	0.432052	-0.0658957	0.947461	0.999992	mec-4	X	16803368	16807125	-1
WBGene00003169	2502.64	-0.0387811	0.18163	-0.213517	0.830924	0.999992	mec-5	X	15944009	15948951	1
WBGene00003170	160.941	0.294265	0.4653	0.632421	0.527112	0.999992	mec-6	I	6724917	6728330	1
WBGene00003171	1263.05	0.0100679	0.146535	0.0687062	0.945223	0.999992	mec-7	X	7774859	7776689	-1
WBGene00003172	2646.4	0.0414901	0.10175	0.407764	0.683447	0.999992	mec-8	I	9441010	9450731	-1
WBGene00003173	114.628	0.0192815	0.25064	0.0769288	0.93868	0.999992	mec-9	V	9907632	9915103	-1
WBGene00003174	188.451	0.00911227	0.208901	0.0436201	0.965207	0.999992	mec-10	X	8465832	8470256	-1
WBGene00003175	2177.16	-0.0659016	0.127545	-0.516692	0.605371	0.999992	mec-12	III	3131574	3139234	-1
WBGene00003176	9.5997	-0.132013	1.93683	-0.0681592	0.945659	0.999992	mec-14	III	7190207	7192992	-1
WBGene00003177	11116	0.00278902	0.058682	0.0475276	0.962093	0.999992	mec-15	II	10236936	10239695	-1
WBGene00003178	1047.89	0.0266442	0.198602	0.134159	0.893277	0.999992	mec-17	IV	7983854	7987183	-1
WBGene00003179	136.72	-0.180395	0.270692	-0.666421	0.505142	0.999992	mec-18	X	4271169	4274229	-1
WBGene00003181	3.83784	-0.000743359	3.67216	-0.000202431	0.999838	0.999992	med-2	III	6884503	6885027	1
WBGene00003182	815.513	0.176714	0.148926	1.18659	0.235388	0.999992	mef-2	I	9095957	9100862	1
WBGene00003183	15938.6	-0.0196008	0.0942387	-0.20799	0.835236	0.999992	mei-1	I	8294881	8296940	1
WBGene00003184	16100.7	-0.0430164	0.083639	-0.51431	0.607035	0.999992	mei-2	I	6564749	6565868	-1
WBGene00003185	10106.6	0.0637587	0.0653571	0.975544	0.32929	0.999992	mek-1	X	7479248	7481010	1
WBGene00003186	7449.52	0.03744	0.068919	0.543246	0.58696	0.999992	mek-2	I	3005403	3013448	-1
WBGene00003196	19899.2	-0.0170093	0.0535879	-0.317409	0.750933	0.999992	mel-11	II	9358531	9369098	1
WBGene00003209	18727.3	0.119207	0.188177	0.633484	0.526418	0.999992	mel-26	I	9132538	9135753	1
WBGene00003210	32237.1	-0.0357994	0.0538383	-0.664944	0.506087	0.999992	mel-28	III	4786080	4792391	1
WBGene00003214	91908.9	-0.0382646	0.0872132	-0.438748	0.660844	0.999992	mel-32	III	6440145	6443000	-1
WBGene00003216	6888.17	-0.0129735	0.0557389	-0.232754	0.815952	0.999992	memi-1	IV	4758982	4760428	-1
WBGene00003218	29659.3	-0.0148313	0.0513459	-0.288851	0.772695	0.999992	mep-1	IV	11524642	11527954	1
WBGene00003219	4422.37	0.0202449	0.0745336	0.271621	0.785913	0.999992	mes-1	X	11857478	11862373	1
WBGene00003220	8855.84	-0.00349881	0.0646429	-0.0541253	0.956835	0.999992	mes-2	II	14383973	14388454	1
WBGene00003221	9219.23	0.102007	0.129838	0.785651	0.432072	0.999992	mes-3	I	4996839	5003161	1
[truncated: 17,634 more rows]
